# Supplementary material for: Organocatalytic formal [3 + 3] cyclization of α-(6-indolyl) propargylic alcohols
Source: Royal Society of Chemistry journal article supplement (doi:10.1039/d2ob01206e), 2022-01-01
Supplement: d2ob01206e1.pdf [file d2ob01206e1.pdf]

# Supporting Information

Zhibin Yue,<sup>a</sup> Ziyang Wang,<sup>a</sup> Yunfeng Zhang,<sup>c</sup> Xuling Chen,<sup>b</sup> Pengfei Li,<sup>\*b</sup> and  
Wenjun Li<sup>\*a</sup>

<sup>a</sup> Department of Medicinal Chemistry, School of Pharmacy, Qingdao University, Qingdao, 266021, China.

<sup>b</sup> Shenzhen Grubbs Institute and Department of Chemistry, Guangdong Provincial Key Laboratory of Catalysis, Southern University of Science and Technology (SUSTech), Shenzhen 518055, China.

<sup>c</sup> Department of Orthopedics, Qingdao Municipal Hospital, Qingdao, 266011, China.

|                                                            |           |
|------------------------------------------------------------|-----------|
| <b>A: General Information and Starting Materials</b> ..... | <b>2</b>  |
| <b>B: General Procedure</b> .....                          | <b>2</b>  |
| <b>C: The Optimization of 1a and 4a</b> .....              | <b>4</b>  |
| <b>D: Characterization Data</b> .....                      | <b>5</b>  |
| <b>E: Large Scale Reaction</b> .....                       | <b>17</b> |
| <b>F: Control Experiments</b> .....                        | <b>17</b> |
| <b>G: ESI-MS Studies</b> .....                             | <b>20</b> |
| <b>H: NMR Analysis</b> .....                               | <b>21</b> |
| <b>I: X-Ray Analysis Data</b> .....                        | <b>56</b> |
| <b>J: Reference</b> .....                                  | <b>58</b> |

## A: General Information and Starting Materials

**General Information.** Proton nuclear magnetic resonance ( $^1\text{H}$  NMR) spectra and carbon nuclear magnetic resonance ( $^{13}\text{C}$  NMR) spectra were recorded on a Bruker ACF300 spectrometer (500 MHz and 126 MHz). Chemical shifts for protons are reported in parts per million downfield from tetramethylsilane and are referenced to residual protium in the NMR solvent ( $\text{CDCl}_3$ :  $\delta$  7.26,  $(\text{CD}_3)_2\text{SO}$ :  $\delta$  2.50). Chemical shifts for carbon are reported in parts per million downfield from tetramethylsilane and are referenced to the carbon resonances of the solvent ( $\text{CDCl}_3$ :  $\delta$  77.16,  $(\text{CD}_3)_2\text{SO}$ :  $\delta$  39.50). Data are represented as follows: chemical shift, integration, multiplicity (br = broad, s = singlet, d = doublet, t = triplet, q = quartet, m = multiplet), coupling constants in Hertz (Hz). All high resolution mass spectra were obtained on a Finnigan/MAT 95XL-T mass spectrometer. Optical Rotation was measured on a Rudolph Autopol I polarimeter. For thin layer chromatography (TLC), Merck pre-coated TLC plates (Merck 60 F254) were used, and compounds were visualized with a UV light at 254 nm. Flash chromatography separations were performed on Merck 60 (0.040-0.063 mm) mesh silica gel.

**Starting Materials.** All solvents, inorganic reagents were from commercial sources and used without purification unless otherwise noted. The propargylic alcohol and was prepared following the literature procedures.<sup>1-2</sup>

## B: General Procedure

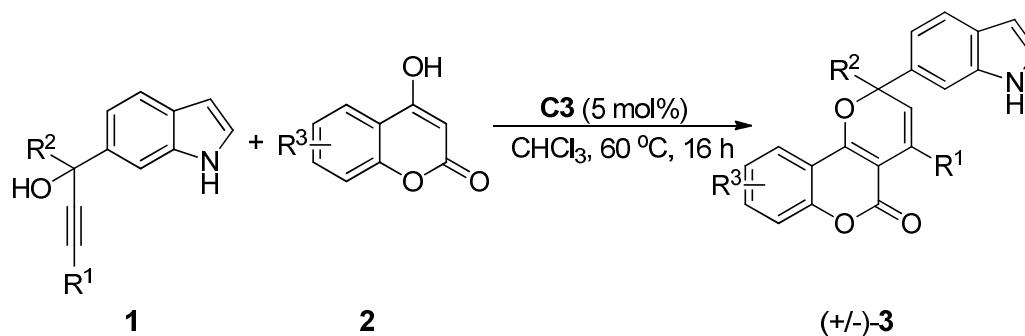

To a solution of  $\text{CHCl}_3$  (0.5 mL) were added  $\alpha$ -indolyl propargylic alcohols **1** (0.05 mmol), coumarins **2** (0.06 mmol) and **C3** (0.0025 mmol). The reaction mixture was stirred at  $60^\circ\text{C}$  for 16 h, then the solvent was removed under vacuum. The residue was purified by silica gel chromatography to yield the desired product (+/-)-**3**.

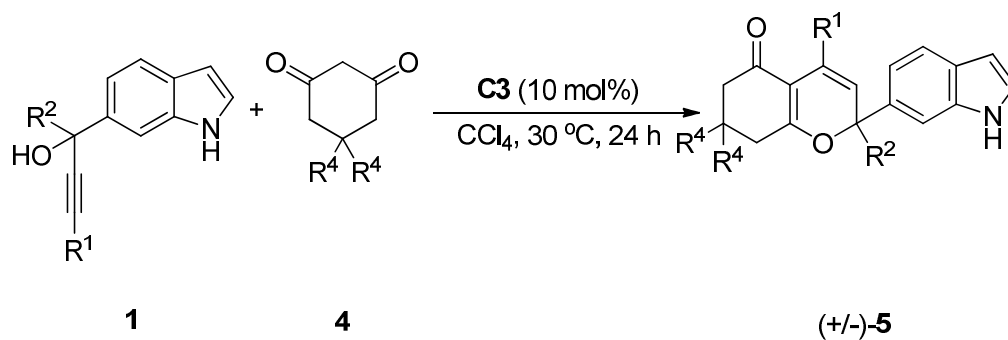

To a solution of  $\text{CCl}_4$  (0.3 mL) were added  $\alpha$ -indolyl propargylic alcohols **1** (0.05 mmol), 1,3-cyclohexanediones **4** (0.06 mmol) and **C3** (0.005 mmol). The reaction mixture was stirred at 30 °C for 24 h, then the solvent was removed under vacuum. The residue was purified by silica gel chromatography to yield the desired product **(+/-)-5**.

### C: The optimization of **1a** and **4a**<sup>a</sup>

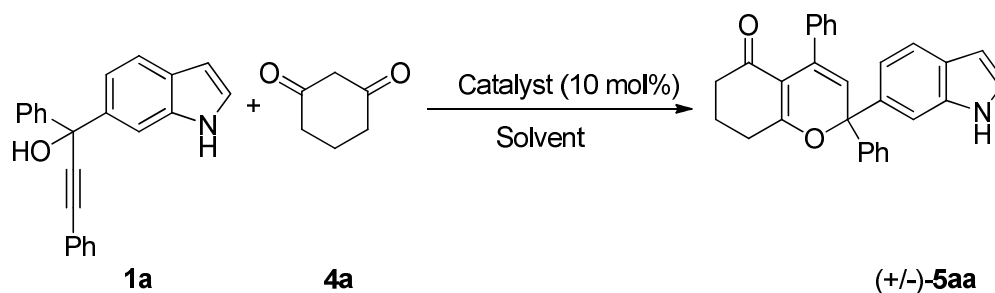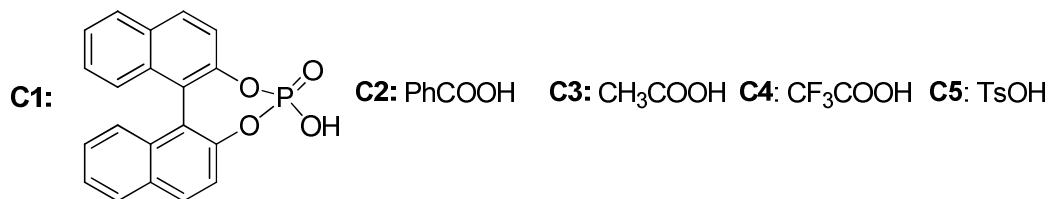

| Entry           | Cat.      | Solvent           | Yield[%] <sup>b</sup> |
|-----------------|-----------|-------------------|-----------------------|
| 1               | <b>C1</b> | DCM               | 39                    |
| 2               | <b>C2</b> | DCM               | 37                    |
| 3               | <b>C3</b> | DCM               | 57                    |
| 4               | <b>C4</b> | DCM               | <5                    |
| 5               | <b>C5</b> | DCM               | <5                    |
| 6               | <b>C3</b> | toluene           | 60                    |
| 7               | <b>C3</b> | PhCF <sub>3</sub> | 78                    |
| 8               | <b>C3</b> | PhCl              | 36                    |
| 9               | <b>C3</b> | xylene            | 55                    |
| 10              | <b>C3</b> | CHCl <sub>3</sub> | 60                    |
| 11              | <b>C3</b> | CCl <sub>4</sub>  | 82                    |
| 12              | <b>C3</b> | DCE               | 47                    |
| 13              | <b>C3</b> | THF               | <5                    |
| 14 <sup>c</sup> | <b>C3</b> | CCl <sub>4</sub>  | 91                    |
| 15 <sup>d</sup> | <b>C3</b> | CCl <sub>4</sub>  | 77                    |
| 18 <sup>e</sup> | <b>C3</b> | CHCl <sub>3</sub> | 71                    |

<sup>a</sup> Reaction conditions: a mixture of **1a** (0.05 mmol), **4a** (0.06 mmol) and catalyst (10 mol%) in the solvent (0.3 mL) was stirred at room temperature for 24 h. <sup>b</sup> Isolated yield. <sup>c</sup> The reaction was stirred at 30 °C for 24 h. <sup>d</sup> The reaction was stirred at 50 °C for 6 h. <sup>e</sup> 5 mol% of **C3** was used at 60 °C for 16 h.

## D: Characterization Data

### 2-(1*H*-indol-6-yl)-2,4-diphenylpyrano[3,2-*c*]chromen-5(2*H*)-one (3aa)

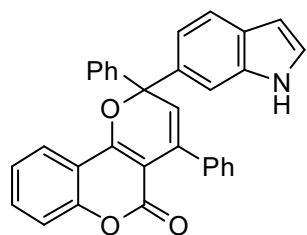

Eluent for flash column chromatography: petroleum ether/ethyl acetate = 15:1. White solid, 22.8 mg, 98% yield. Mp 188.6-191.6 °C. <sup>1</sup>H NMR ((CD<sub>3</sub>)<sub>2</sub>SO, 500 MHz): □ (ppm) 11.23 (s, 1H), 8.22-8.20 (m, 1H), 7.76 (t, *J* = 10.0 Hz, 1H), 7.66-7.64 (m, 3H), 7.58-7.52 (m, 4H), 7.46-7.38 (m, 8H), 7.20-7.18 (d, *J* = 10.0 Hz, 1H), 6.44 (s, 1H), 6.35 (s, 1H). <sup>13</sup>C NMR ((CD<sub>3</sub>)<sub>2</sub>SO, 126 MHz): □ (ppm) 160.1, 158.0, 153.4, 144.2, 138.2, 136.0, 135.7, 133.7, 133.3, 128.9, 128.4, 128.1, 128.0, 127.8, 127.3, 127.1, 126.6, 125.2, 123.7, 120.7, 118.3, 116.9, 115.3, 110.4, 102.9, 101.4, 86.4. HRMS (ESI): exact mass calculated for [M+H]<sup>+</sup> (C<sub>32</sub>H<sub>22</sub>NO<sub>3</sub>) requires *m/z* 468.1594, found *m/z* 468.1596.

### 4-(4-Fluorophenyl)-2-(1*H*-indol-6-yl)-2-phenylpyrano[3,2-*c*]chromen-5(2*H*)-one (3ba)

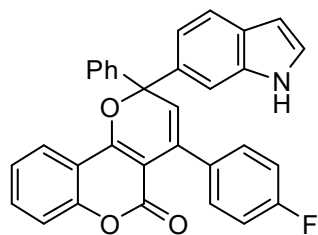

Eluent for flash column chromatography: petroleum ether/ethyl acetate = 15:1. White solid, 23.0 mg, 95% yield. Mp 179.4-181.3 °C. <sup>1</sup>H NMR ((CD<sub>3</sub>)<sub>2</sub>SO, 500 MHz): □ (ppm) 11.17 (s, 1H), 8.15-8.13 (m, 1H), 7.69 (m, 1H), 7.60-7.58 (m, 3H), 7.54-7.50 (m, 3H), 7.47-7.44 (m, 1H), 7.41-7.36 (m, 4H), 7.33-7.30 (m, 1H), 7.20-7.16 (m, 2H), 7.14-7.12 (m, 1H), 6.39 (s, 1H), 6.32 (s, 1H). <sup>13</sup>C NMR ((CD<sub>3</sub>)<sub>2</sub>SO, 126 MHz): □ (ppm) 162.3 (d, *J* = 244.4 Hz), 160.1, 158.1, 153.4, 144.1, 135.8 (d, *J* = 40.0 Hz), 134.5, 133.7, 132.3, 130.3 (d, *J* = 8.8 Hz), 128.9, 128.3, 127.8, 127.3, 127.1, 126.6, 125.2, 123.7, 120.6, 118.3, 116.9, 115.3, 114.9 (d, *J* = 21.3 Hz), 110.4, 102.7, 101.4, 86.3. HRMS (ESI): exact mass calculated for [M+H]<sup>+</sup> (C<sub>32</sub>H<sub>21</sub>FNO<sub>3</sub>) requires *m/z* 486.1500, found *m/z* 486.1499.

### 4-(4-Chlorophenyl)-2-(1*H*-indol-6-yl)-2-phenylpyrano[3,2-*c*]chromen-5(2*H*)-one (3ca)

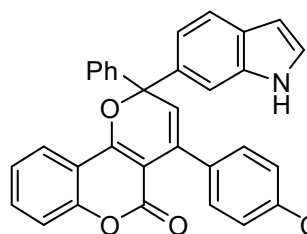

Eluent for flash column chromatography: petroleum ether/ethyl acetate = 15:1. White solid, 23.7 mg, 95% yield. Mp 179.3-181.4 °C. <sup>1</sup>H NMR ((CD<sub>3</sub>)<sub>2</sub>SO, 500 MHz): □ (ppm) 11.16 (s, 1H), 8.15-8.14 (m, 1H), 7.72-7.68 (m, 1H), 7.59-7.57 (m, 3H), 7.52-7.50 (m, 3H), 7.48-7.45 (m, 1H), 7.42-7.36 (m, 6H), 7.32-7.30 (m, 1H), 7.13-7.11 (m, 1H), 6.39-6.38 (m, 1H), 6.36 (s, 1H). <sup>13</sup>C NMR ((CD<sub>3</sub>)<sub>2</sub>SO, 126 MHz): □ (ppm) 160.2, 158.1, 153.4, 144.0, 137.0, 135.9, 135.6, 133.8, 132.7, 132.1, 130.0, 128.9, 128.4, 128.0, 127.8, 127.7, 127.1, 126.6, 125.2, 123.7, 120.7, 118.3, 116.9, 115.3, 110.3, 102.6, 101.4, 86.4. HRMS (ESI): exact mass calculated for [M+H]<sup>+</sup> (C<sub>32</sub>H<sub>21</sub>ClNO<sub>3</sub>)

requires  $m/z$  502.1204, found  $m/z$  502.1205.

**4-(4-Bromophenyl)-2-(1*H*-indol-6-yl)-2-phenylpyrano[3,2-*c*]chromen-5(2*H*)-one (3da)**

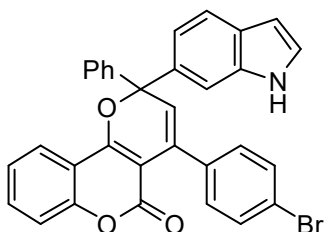

Eluent for flash column chromatography: petroleum ether/ethyl acetate = 15:1. White solid, 25.8 mg, 95% yield. Mp 170.1-172.9 °C.  $^1\text{H}$  NMR ( $\text{CDCl}_3$ , 500 MHz):  $\square$  (ppm) 8.29 (s, 1H), 8.05-8.03 (m, 1H), 7.60 (d,  $J = 10.0$  Hz, 1H), 7.55-7.54 (m, 1H), 7.52-7.47 (m, 5H), 7.38-7.29 (m, 6H), 7.25 (d,  $J = 10.0$  Hz, 1H), 7.21-7.18 (m, 2H), 6.52 (s, 1H), 6.02 (s, 1H).  $^{13}\text{C}$  NMR ( $\text{CDCl}_3$ , 126 MHz):  $\square$  (ppm) 160.6, 158.8, 153.6, 143.7, 137.0, 136.3, 135.2, 132.8, 132.7, 131.0, 129.3, 128.4, 128.1, 127.8, 126.8, 126.4, 125.6, 124.1, 123.3, 121.9, 120.9, 119.4, 116.7, 115.5, 110.4, 102.5, 102.2, 86.7. HRMS (ESI): exact mass calculated for  $[\text{M}+\text{H}]^+$  ( $\text{C}_{32}\text{H}_{21}\text{BrNO}_3$ ) requires  $m/z$  546.0699, found  $m/z$  546.0703.

**2-(1*H*-indol-6-yl)-2-phenyl-4-(*p*-tolyl)pyrano[3,2-*c*]chromen-5(2*H*)-one (3ea)**

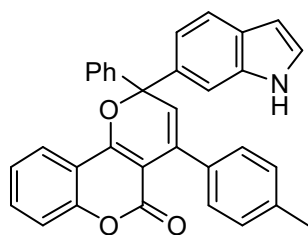

Eluent for flash column chromatography: petroleum ether/ethyl acetate = 15:1. White solid, 21.8 mg, 91% yield. Mp 176.8-178.1 °C.  $^1\text{H}$  NMR ( $\text{CDCl}_3$ , 500 MHz):  $\square$  (ppm) 8.26 (s, 1H), 8.04-8.03 (m, 1H), 7.59-7.50 (m, 5H), 7.36-7.27 (m, 5H), 7.26-7.15 (m, 6H), 6.51 (s, 1H), 6.01 (s, 1H), 2.38 (s, 3H).  $^{13}\text{C}$  NMR ( $\text{CDCl}_3$ , 126 MHz):  $\square$  (ppm) 160.4, 158.8, 153.6, 144.0, 137.6, 136.6, 135.1, 135.0, 133.6, 132.4, 128.7, 128.3, 128.0, 127.7, 127.4, 126.9, 125.7, 125.5, 124.0, 123.3, 120.8, 119.5, 116.6, 115.7, 110.5, 102.7, 102.5, 86.7, 21.3. HRMS (ESI): exact mass calculated for  $[\text{M}+\text{H}]^+$  ( $\text{C}_{33}\text{H}_{24}\text{NO}_3$ ) requires  $m/z$  482.1751, found  $m/z$  482.1753.

**2-(1*H*-indol-6-yl)-4-(4-methoxyphenyl)-2-phenylpyrano[3,2-*c*]chromen-5(2*H*)-one (3fa)**

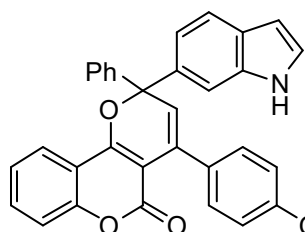

Eluent for flash column chromatography: petroleum ether/ethyl acetate = 12:1. White solid, 21.3 mg, 86% yield. Mp 198.1-201.9 °C.  $^1\text{H}$  NMR ( $(\text{CD}_3)_2\text{SO}$ , 500 MHz):  $\square$  (ppm) 11.21 (s, 1H), 8.14 (d,  $J = 10.0$  Hz, 1H), 7.70-7.67 (m, 1H), 7.58-7.56 (m, 3H), 7.50 (d,  $J = 10.0$  Hz, 1H), 7.47-7.44 (m, 1H), 7.40-7.35 (m, 6H), 7.32-7.29 (m, 1H), 7.12 (d,  $J = 10.0$  Hz, 1H), 6.91-6.90 (m, 2H), 6.38 (s, 1H), 6.21 (s, 1H), 3.77 (s, 3H).  $^{13}\text{C}$  NMR ( $(\text{CD}_3)_2\text{SO}$ , 126 MHz):  $\square$  (ppm) 160.1, 159.3, 158.0, 153.4, 144.3, 136.0, 135.6, 133.6, 132.9, 130.3, 129.3, 128.8, 128.3, 127.8, 127.0, 126.5, 126.2, 125.1, 123.6, 120.6, 118.3, 116.8, 115.5, 113.5, 110.3, 103.0, 101.4, 86.3, 55.6. HRMS (ESI): exact mass calculated for  $[\text{M}+\text{H}]^+$  ( $\text{C}_{33}\text{H}_{24}\text{NO}_4$ ) requires  $m/z$  498.1700, found  $m/z$  498.1704.

**4-(3-Fluorophenyl)-2-(1*H*-indol-6-yl)-2-phenylpyrano[3,2-*c*]chromen-5(2*H*)-one (3ga)**

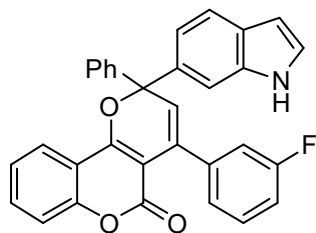

Eluent for flash column chromatography: petroleum ether/ethyl acetate = 15:1. White solid, 21.3 mg, 88% yield. Mp 164.1-167.6 °C. <sup>1</sup>H NMR (CDCl<sub>3</sub>, 500 MHz): □ (ppm) 8.27 (s, 1H), 8.06-8.04 (m, 1H), 7.60 (d, *J* = 10.0 Hz, 1H), 7.57 (s, 1H), 7.56-7.53 (m, 1H), 7.51-7.50 (m, 2H), 7.39-7.28 (m, 6H), 7.25-7.24 (m, 1H), 7.22-7.18 (m, 2H), 7.17-7.15 (m, 1H), 7.06-7.02 (m, 1H), 6.54 (s, 1H), 6.05 (s, 1H). <sup>13</sup>C NMR (CDCl<sub>3</sub>, 126 MHz): □ (ppm) 162.4 (d, *J* = 244.4 Hz), 160.5, 158.7, 153.6, 143.7, 140.2 (d, *J* = 8.8 Hz), 136.3, 135.1, 132.8, 132.7, 129.3 (d, *J* = 8.8 Hz), 128.4, 128.1, 127.8, 126.8, 126.7, 125.5, 124.1, 123.4, 123.3, 120.9, 119.4, 116.7, 115.5, 114.8 (d, *J* = 7.5 Hz), 114.6 (d, *J* = 6.3 Hz), 110.3, 102.6, 102.3, 86.7. HRMS (ESI): exact mass calculated for [M+H]<sup>+</sup> (C<sub>32</sub>H<sub>21</sub>FNO<sub>3</sub>) requires *m/z* 486.1500, found *m/z* 486.1501.

**4-(3-Chlorophenyl)-2-(1*H*-indol-6-yl)-2-phenylpyrano[3,2-*c*]chromen-5(2*H*)-one (3ha)**

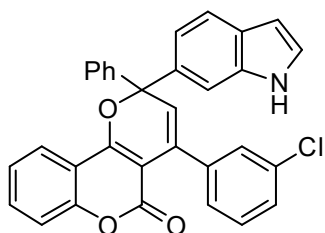

Eluent for flash column chromatography: petroleum ether/ethyl acetate = 15:1. White solid, 21.8 mg, 87% yield. Mp 166.6-167.9 °C. <sup>1</sup>H NMR ((CD<sub>3</sub>)<sub>2</sub>SO, 500 MHz): □ (ppm) 11.17 (s, 1H), 8.16-8.14 (m, 1H), 7.71-7.68 (m, 1H), 7.60-7.59 (m, 4H), 7.51 (d, *J* = 10.0 Hz, 1H), 7.48-7.47 (m, 1H), 7.45-7.43 (m, 2H), 7.40-7.36 (m, 5H), 7.33-7.30 (m, 1H), 7.14-7.12 (m, 1H), 6.40 (s, 1H), 6.39-6.38 (m, 1H). <sup>13</sup>C NMR ((CD<sub>3</sub>)<sub>2</sub>SO, 126 MHz): □ (ppm) 160.2, 158.1, 153.4, 143.9, 140.3, 135.8, 135.6, 133.8, 132.9, 131.9, 129.9, 128.9, 128.8, 128.4, 128.2, 127.9, 127.8, 127.1, 126.9, 126.6, 125.2, 123.7, 120.7, 118.3, 116.9, 115.3, 110.3, 102.6, 101.4, 86.4. HRMS (ESI): exact mass calculated for [M+H]<sup>+</sup> (C<sub>32</sub>H<sub>21</sub>ClNO<sub>3</sub>) requires *m/z* 502.1024, found *m/z* 502.1026.

**4-(3-Bromophenyl)-2-(1*H*-indol-6-yl)-2-phenylpyrano[3,2-*c*]chromen-5(2*H*)-one (3ia)**

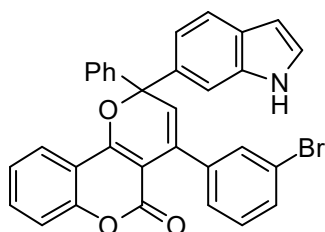

Eluent for flash column chromatography: petroleum ether/ethyl acetate = 15:1. White solid, 23.3 mg, 85% yield. Mp 131.4-134.3 °C. <sup>1</sup>H NMR (CDCl<sub>3</sub>, 500 MHz): □ (ppm) 8.30 (s, 1H), 8.07-8.05 (m, 1H), 7.63-7.61 (m, 2H), 7.58-7.54 (m, 2H), 7.52-7.48 (m, 3H), 7.40-7.33 (m, 5H), 7.32-7.28 (m, 2H), 7.25-7.23 (m, 1H), 7.21-7.19 (m, 1H), 6.55 (s, 1H), 6.04 (s, 1H). <sup>13</sup>C NMR (CDCl<sub>3</sub>, 126 MHz): □ (ppm) 160.6, 158.7, 153.6, 143.6, 140.1, 136.2, 135.1, 132.7, 132.5, 130.8, 130.4, 129.3, 128.4, 128.1, 127.8, 126.9, 126.8, 126.4, 125.6, 124.1, 123.3, 122.0, 120.9, 119.4, 116.7, 115.5, 110.4, 102.5, 102.2, 86.7. HRMS (ESI): exact mass calculated for [M+H]<sup>+</sup> (C<sub>32</sub>H<sub>21</sub>BrNO<sub>3</sub>) requires *m/z* 546.0699, found *m/z* 546.0701.

### 2-(1*H*-indol-6-yl)-2-phenyl-4-(*m*-tolyl)pyrano[3,2-*c*]chromen-5(2*H*)-one (3ja)

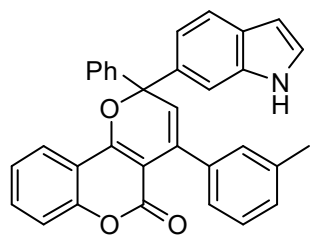

Eluent for flash column chromatography: petroleum ether/ethyl acetate = 15:1. White solid, 20.4 mg, 85% yield. Mp 186.2-191.0 °C. <sup>1</sup>H NMR ((CD<sub>3</sub>)<sub>2</sub>SO, 500 MHz): □ (ppm) 11.17 (s, 1H), 8.14 (d, *J* = 10.0 Hz, 1H), 7.70-7.67 (m, 1H), 7.59-7.57 (m, 3H), 7.51 (d, *J* = 10.0 Hz, 1H), 7.47-7.44 (m, 1H), 7.41-7.36 (m, 4H), 7.32-7.30 (m, 2H), 7.23-7.22 (m, 2H), 7.13-7.12 (m, 2H), 6.38 (s, 1H), 6.25 (s, 1H), 2.33 (s, 3H). <sup>13</sup>C NMR ((CD<sub>3</sub>)<sub>2</sub>SO, 126 MHz): □ (ppm) 160.1, 158.0, 153.4, 144.2, 138.1, 137.2, 135.9, 135.6, 133.7, 133.4, 128.9, 128.7, 128.5, 128.3, 128.0, 127.8, 127.1, 127.0, 126.6, 125.2, 125.1, 123.6, 120.6, 118.3, 116.8, 115.3, 110.4, 103.0, 101.4, 86.4, 21.4. HRMS (ESI): exact mass calculated for [M+H]<sup>+</sup> (C<sub>33</sub>H<sub>24</sub>NO<sub>3</sub>) requires *m/z* 482.1751, found *m/z* 482.1751.

### 2-(1*H*-indol-6-yl)-4-(3-methoxyphenyl)-2-phenylpyrano[3,2-*c*]chromen-5(2*H*)-one (3ka)

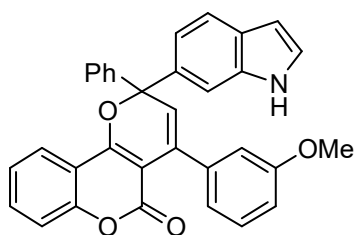

Eluent for flash column chromatography: petroleum ether/ethyl acetate = 12:1. White solid, 21.6 mg, 87% yield. Mp 139.1-141.9 °C. <sup>1</sup>H NMR (CDCl<sub>3</sub>, 500 MHz): □ (ppm) 8.28 (s, 1H), 8.04 (d, *J* = 10.0 Hz, 1H), 7.59-7.57 (m, 2H), 7.53-7.49 (m, 3H), 7.36-7.33 (m, 2H), 7.32-7.28 (m, 3H), 7.25 (s, 1H), 7.22-7.21 (m, 1H), 7.19-7.18 (m, 1H), 7.03-7.01 (m, 1H), 6.98 (s, 1H), 6.88-6.86 (m, 1H), 6.51 (s, 1H), 6.04 (s, 1H), 3.80 (s, 3H). <sup>13</sup>C NMR (CDCl<sub>3</sub>, 126 MHz): □ (ppm) 160.4, 159.1, 158.7, 153.6, 143.9, 139.5, 136.4, 135.1, 133.6, 132.5, 128.9, 128.3, 128.0, 127.7, 126.8, 126.2, 125.5, 124.0, 123.3, 120.8, 120.2, 119.4, 116.6, 115.6, 113.6, 113.1, 110.5, 102.7, 102.4, 86.7, 55.3. HRMS (ESI): exact mass calculated for [M+H]<sup>+</sup> (C<sub>33</sub>H<sub>24</sub>NO<sub>4</sub>) requires *m/z* 498.1700, found *m/z* 498.1700.

### 4-(2-Fluorophenyl)-2-(1*H*-indol-6-yl)-2-phenylpyrano[3,2-*c*]chromen-5(2*H*)-one (3la)

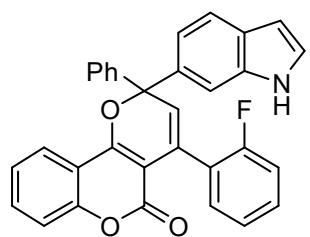

Eluent for flash column chromatography: petroleum ether/ethyl acetate = 15:1. White solid, 20.6 mg, 85% yield. Mp 171.8-173.5 °C. <sup>1</sup>H NMR (CDCl<sub>3</sub>, 500 MHz): □ (ppm) 8.39 (s, 1H), 8.06-8.05 (m, 1H), 7.66-7.64 (m, 2H), 7.57-7.49 (m, 4H), 7.41-7.28 (m, 7H), 7.23-7.18 (m, 2H), 7.12-7.10 (m, 1H), 6.56 (s, 1H), 6.11 (s, 1H). <sup>13</sup>C NMR (CDCl<sub>3</sub>, 126 MHz): □ (ppm) 160.1 (d, *J* = 234.4 Hz), 159.1, 153.4, 143.8, 136.4, 135.2, 132.4, 129.9, 129.8, 129.6 (d, *J* = 8.8 Hz), 128.4, 128.2, 128.1, 127.7, 127.4, 126.9, 126.3 (d, *J* = 15.0 Hz), 125.6, 124.0, 123.9 (d, *J* = 3.8 Hz), 123.3, 120.8, 119.3, 116.6, 115.6, 115.1 (d, *J* = 21.4 Hz), 110.5, 102.7, 102.4, 86.4. HRMS (ESI): exact mass calculated for [M+H]<sup>+</sup> (C<sub>32</sub>H<sub>21</sub>FNO<sub>3</sub>) requires *m/z* 486.1500, found *m/z*



486.1501.

**2-(1*H*-indol-6-yl)-2-phenyl-4-(*o*-tolyl)pyrano[3,2-*c*]chromen-5(2*H*)-one (3ma)**

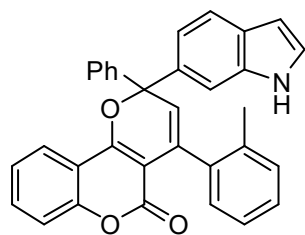

Eluent for flash column chromatography: petroleum ether/ethyl acetate = 15:1. White solid, 20.9 mg, 87% yield.

Mp 196.8-199.1 °C. <sup>1</sup>H NMR (CDCl<sub>3</sub>, 500 MHz): □ (ppm) 8.29 (s, 1H), 8.04 (d, *J* = 10.0 Hz, 1H), 7.63-7.48 (m, 5H), 7.39-7.28 (m, 5H), 7.23-7.16 (m, 6H), 6.53 (s, 1H), 5.95 (s, 1H), 2.25 (s, 3H). <sup>13</sup>C NMR (CDCl<sub>3</sub>, 126 MHz): □ (ppm) 159.0, 158.8, 153.5, 138.6, 137.6, 135.9, 135.2, 132.9, 132.4, 129.5, 128.4, 128.3, 128.2, 127.9, 127.7, 126.7, 126.0, 125.5, 124.0, 123.3, 120.8, 119.3, 116.6, 115.6, 110.4, 110.0, 102.9, 102.4, 86.5, 20.1. HRMS (ESI): exact mass calculated for [M+H]<sup>+</sup> (C<sub>33</sub>H<sub>24</sub>NO<sub>3</sub>) requires *m/z* 482.1751, found *m/z* 482.1753.

**2-(1*H*-indol-6-yl)-2-phenyl-4-(thiophen-3-yl)pyrano[3,2-*c*]chromen-5(2*H*)-one (3na)**

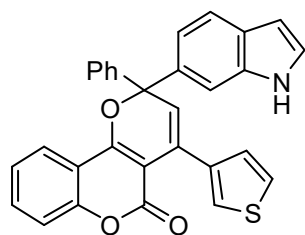

Eluent for flash column chromatography: petroleum ether/ethyl acetate = 15:1. White solid, 21.5 mg, 91% yield.

Mp 164.1-169.2 °C. <sup>1</sup>H NMR (CDCl<sub>3</sub>, 500 MHz): □ (ppm) 8.24 (s, 1H), 7.99 (d, *J* = 10.0 Hz, 1H), 7.56-7.54 (m, 2H), 7.50-7.45 (m, 3H), 7.37 (s, 1H), 7.33-7.27 (m, 4H), 7.24-7.21 (m, 2H), 7.19-7.18 (m, 1H), 7.15 (d, *J* = 10.0 Hz, 1H), 7.11-7.10 (m, 1H), 6.48 (s, 1H), 6.06 (s, 1H). <sup>13</sup>C NMR (CDCl<sub>3</sub>, 126 MHz): □ (ppm) 160.3, 158.8, 153.5, 143.8, 138.3, 136.4, 135.1, 132.5, 128.7, 128.3, 128.0, 127.9, 127.7, 126.9, 125.5, 124.6, 124.0, 123.3, 122.5, 120.8, 119.5, 116.6, 115.6, 110.5, 102.6, 102.5, 86.5. HRMS (ESI): exact mass calculated for [M+H]<sup>+</sup> (C<sub>30</sub>H<sub>20</sub>NO<sub>3</sub>S) requires *m/z* 474.1158, found *m/z* 474.1161.

**4-Cyclopropyl-2-(1*H*-indol-6-yl)-2-phenylpyrano[3,2-*c*]chromen-5(2*H*)-one (3oa)**

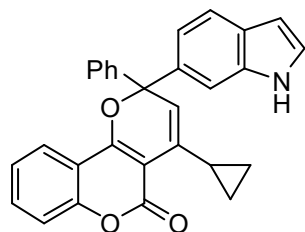

Eluent for flash column chromatography: petroleum ether/ethyl acetate = 10:1. White solid, 15.3 mg, 71% yield.

Mp 126.5-129.8 °C. <sup>1</sup>H NMR (CDCl<sub>3</sub>, 500 MHz): □ (ppm) 8.27 (s, 1H), 7.96 (d, *J* = 10.0 Hz, 1H), 7.57-7.56 (m, 1H), 7.50-7.47 (m, 1H), 7.45 (s, 1H), 7.41-7.39 (m, 2H), 7.35-7.29 (m, 3H), 7.25-7.22 (m, 3H), 7.09-7.07 (m, 1H), 6.52 (s, 1H), 5.64 (s, 1H), 2.52-2.50 (m, 1H), 0.91-0.87 (m, 2H), 0.64-0.57 (m, 2H). <sup>13</sup>C NMR (CDCl<sub>3</sub>, 126 MHz): □ (ppm) 159.7, 159.1, 153.4, 144.4, 137.4, 135.1, 134.6, 132.2, 128.2, 127.8, 127.5, 126.8, 125.3, 123.9, 123.3, 120.7, 119.7, 119.4, 116.4, 115.5, 110.2, 103.6, 102.5, 86.3, 13.1, 7.3, 7.1. HRMS (ESI): exact mass calculated for [M+H]<sup>+</sup> (C<sub>29</sub>H<sub>22</sub>NO<sub>3</sub>) requires *m/z* 432.1594, found *m/z* 432.1594.

#### 4-Butyl-2-(1*H*-indol-6-yl)-2-phenylpyrano[3,2-*c*]chromen-5(2*H*)-one (3pa)

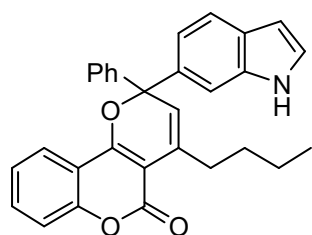

Eluent for flash column chromatography: petroleum ether/ethyl acetate = 16:1. White solid, 16.3 mg, 73% yield. Mp 63.2-65.0 °C. <sup>1</sup>H NMR (CDCl<sub>3</sub>, 500 MHz): □ (ppm) 8.27 (s, 1H), 7.98 (d, *J* = 10.0 Hz, 1H), 7.59 (d, *J* = 10.0 Hz, 1H), 7.51-7.248(m, 2H), 7.46-7.44 (m, 2H), 7.37-7.31 (m, 3H), 7.28-7.27 (s, 1H), 7.25-7.23 (m, 2H), 7.15-7.13 (m, 1H), 6.53 (s, 1H), 5.81 (s, 1H), 2.90-2.76 (m, 2H), 1.56-1.52 (m, 2H), 1.46-1.40 (m, 2H), 0.94 (t, *J* = 10.0 Hz, 3H). <sup>13</sup>C NMR (CDCl<sub>3</sub>, 126 MHz): □ (ppm) 159.7, 153.3, 144.5, 137.4, 135.1, 133.1, 132.1, 128.6, 128.2, 127.8, 127.5, 126.8, 125.3, 123.9, 123.2, 122.6, 120.7, 119.4, 116.4, 115.6, 110.3, 102.9, 102.5, 86.3, 32.8, 31.4, 22.6, 14.1. HRMS (ESI): exact mass calculated for [M+H]<sup>+</sup> (C<sub>30</sub>H<sub>26</sub>NO<sub>3</sub>) requires *m/z* 448.1907, found *m/z* 448.1904.

#### 2-(4-Chlorophenyl)-2-(1*H*-indol-6-yl)-4-phenylpyrano[3,2-*c*]chromen-5(2*H*)-one (3qa)

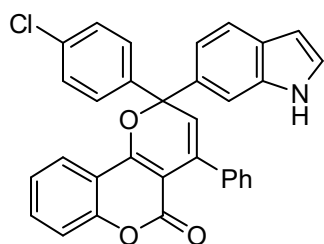

Eluent for flash column chromatography: petroleum ether/ethyl acetate = 15:1. White solid, 23.8 mg, 95% yield. Mp 175.1-179.4 °C. <sup>1</sup>H NMR ((CD<sub>3</sub>)<sub>2</sub>SO, 500 MHz): □ (ppm) 11.18 (s, 1H), 8.15-8.13 (m, 1H), 7.71-7.68 (m, 1H), 7.61-7.59 (m, 3H), 7.52 (d, *J* = 10.0 Hz, 1H), 7.48-7.44 (m, 5H), 7.40-7.34 (m, 5H), 7.12-7.10 (m, 1H), 6.39-6.38 (m, 1H), 6.25 (s, 1H). <sup>13</sup>C NMR ((CD<sub>3</sub>)<sub>2</sub>SO, 126 MHz): □ (ppm) 159.9, 157.9, 153.4, 143.1, 138.0, 135.6, 135.5, 133.8, 133.6, 133.1, 128.9, 128.6, 128.1, 128.0, 127.9, 127.2, 126.8, 125.2, 123.7, 120.8, 118.2, 116.9, 115.2, 110.4, 102.9, 101.5, 85.9. HRMS (ESI): exact mass calculated for [M+H]<sup>+</sup> (C<sub>32</sub>H<sub>21</sub>ClNO<sub>3</sub>) requires *m/z* 502.1204, found *m/z* 502.1205.

#### 2-(1*H*-indol-6-yl)-4-phenyl-2-(*p*-tolyl)pyrano[3,2-*c*]chromen-5(2*H*)-one (3ra)

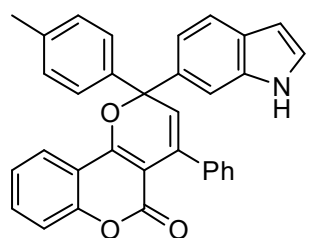

Eluent for flash column chromatography: petroleum ether/ethyl acetate = 15:1. White solid, 23.1 mg, 96% yield. Mp 185.2-189.9 °C. <sup>1</sup>H NMR (CDCl<sub>3</sub>, 500 MHz): □ (ppm) 8.26 (s, 1H), 8.03 (d, *J* = 10.0 Hz, 1H), 7.60-7.58 (m, 2H), 7.53-7.50 (m, 1H), 7.44-7.33 (m, 8H), 7.30-7.27 (m, 1H), 7.22-7.15 (m, 4H), 6.52 (s, 1H), 6.01 (s, 1H), 2.34 (s, 3H). <sup>13</sup>C NMR (CDCl<sub>3</sub>, 126 MHz): □ (ppm) 160.5, 158.9, 153.6, 140.9, 138.4, 137.9, 136.7, 135.2, 133.6, 132.4, 129.0, 127.9, 127.8, 127.6, 127.5, 126.9, 126.3, 125.4, 124.0, 123.3, 120.8, 119.4, 116.6, 115.7, 110.4, 102.6, 102.4, 86.7, 21.1. HRMS (ESI): exact mass calculated for [M+H]<sup>+</sup> (C<sub>33</sub>H<sub>24</sub>NO<sub>3</sub>) requires *m/z* 482.1751, found *m/z* 482.1752.

#### 2-(3-Chlorophenyl)-2-(1*H*-indol-6-yl)-4-phenylpyrano[3,2-*c*]chromen-5(2*H*)-one (3sa)

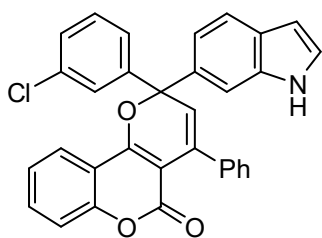

Eluent for flash column chromatography: petroleum ether/ethyl acetate = 15:1. White solid, 21.3 mg, 85% yield. Mp 170.1-172.2 °C.  $^1\text{H}$  NMR ( $(\text{CD}_3)_2\text{SO}$ , 500 MHz):  $\square$  (ppm) 11.20 (s, 1H), 8.18-8.17 (m, 1H), 7.71-7.67 (m, 1H), 7.64 (s, 1H), 7.61-7.60 (m, 1H), 7.58-7.56 (m, 1H), 7.53-7.52 (m, 1H), 7.50-7.42 (m, 4H), 7.40-7.33 (m, 6H), 7.15-7.13 (m, 1H), 6.40-6.39 (m, 1H), 6.34 (s, 1H).  $^{13}\text{C}$  NMR ( $(\text{CD}_3)_2\text{SO}$ , 126 MHz):  $\square$  (ppm) 159.9, 157.9, 153.4, 146.7, 137.9, 135.6, 135.2, 133.8, 133.7, 133.7, 130.9, 128.4, 128.2, 128.1, 128.0, 127.9, 127.3, 126.7, 126.4, 125.3, 125.2, 123.7, 120.8, 118.2, 116.9, 115.2, 110.4, 102.9, 101.5, 85.8. HRMS (ESI): exact mass calculated for  $[\text{M}+\text{H}]^+$  ( $\text{C}_{32}\text{H}_{21}\text{ClNO}_3$ ) requires  $m/z$  502.1204, found  $m/z$  502.1204.

### 2-(1H-indol-6-yl)-4-phenyl-2-(*o*-tolyl)pyrano[3,2-*c*]chromen-5(2H)-one (3ta)

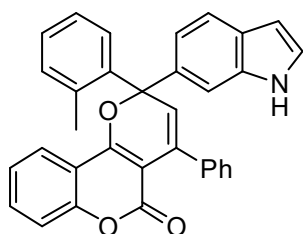

Eluent for flash column chromatography: petroleum ether/ethyl acetate = 15:1. White solid, 21.6 mg, 90% yield. Mp 199.4-200.6 °C.  $^1\text{H}$  NMR ( $(\text{CD}_3)_2\text{SO}$ , 500 MHz):  $\square$  (ppm) 11.14 (s, 1H), 8.09 (d,  $J = 10.0$  Hz, 1H), 7.69-7.65 (m, 1H), 7.57-7.53 (m, 2H), 7.50 (s, 1H), 7.45-7.33 (m, 8H), 7.28-7.26 (m, 2H), 7.21-7.19 (m, 1H), 7.06-7.04 (m, 1H), 6.41 (s, 1H), 6.00 (s, 1H), 2.16 (s, 3H).  $^{13}\text{C}$  NMR ( $(\text{CD}_3)_2\text{SO}$ , 126 MHz):  $\square$  (ppm) 160.2, 158.0, 153.4, 140.5, 138.1, 136.9, 135.8, 135.4, 133.7, 133.0, 129.0, 128.2, 128.1, 127.9, 127.8, 127.1, 126.2, 126.0, 125.1, 123.4, 120.7, 118.2, 117.0, 115.2, 110.4, 102.4, 101.5, 87.6, 21.6. HRMS (ESI): exact mass calculated for  $[\text{M}+\text{H}]^+$  ( $\text{C}_{33}\text{H}_{24}\text{NO}_3$ ) requires  $m/z$  482.1751, found  $m/z$  482.1751.

### 2-Ethyl-2-(1H-indol-6-yl)-4-phenylpyrano[3,2-*c*]chromen-5(2H)-one (3ua)

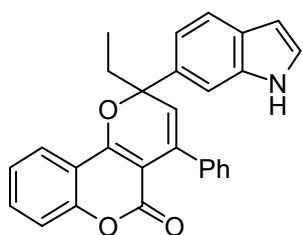

Eluent for flash column chromatography: petroleum ether/ethyl acetate = 14:1. White solid, 14.6 mg, 70% yield. Mp 82.4-86.3 °C.  $^1\text{H}$  NMR ( $\text{CDCl}_3$ , 500 MHz):  $\square$  (ppm) 8.21 (s, 1H), 8.07 (d,  $J = 12.0$  Hz, 1H), 7.61 (d,  $J = 12.0$  Hz, 1H), 7.56-7.52 (m, 2H), 7.40-7.33 (m, 6H), 7.31-7.27 (m, 2H), 7.21-7.20 (m, 1H), 6.52 (s, 1H), 5.96 (s, 1H), 2.41-2.27 (m, 2H), 1.02 (t,  $J = 10.0$  Hz, 3H).  $^{13}\text{C}$  NMR ( $\text{CDCl}_3$ , 126 MHz):  $\square$  (ppm) 161.2, 158.8, 153.5, 138.4, 136.4, 135.2, 134.3, 132.3, 127.8, 127.7, 127.6, 125.1, 125.0, 123.9, 123.1, 120.8, 117.3, 116.6, 115.7, 108.6, 102.7, 102.4, 85.9, 35.5, 8.7. HRMS (ESI): exact mass calculated for  $[\text{M}+\text{H}]^+$  ( $\text{C}_{28}\text{H}_{22}\text{NO}_3$ ) requires  $m/z$  420.1594, found  $m/z$  420.1594.

### 9-Chloro-2-(1H-indol-6-yl)-2,4-diphenylpyrano[3,2-*c*]chromen-5(2H)-one (3ab)

Eluent for flash column chromatography: petroleum ether/ethyl acetate = 15:1. White solid, 23.1 mg, 92% yield. Mp 144.0-150.5 °C.  $^1\text{H}$  NMR ( $\text{CDCl}_3$ , 500 MHz):  $\square$  (ppm) 8.27 (s, 1H), 7.97 (s, 1H), 7.61 (d,  $J = 10.0$  Hz, 1H), 7.56 (s, 1H), 7.50-7.49 (m, 1H),

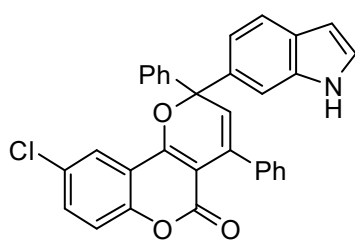

7.48-7.47 (m, 1H), 7.45-7.41 (m, 3H), 7.39-7.32 (m, 6H), 7.24-7.23 (m, 1H), 7.21-7.18 (m, 2H), 6.53 (s, 1H), 6.05 (s, 1H).  $^{13}\text{C}$  NMR ( $\text{CDCl}_3$ , 126 MHz):  $\square$  (ppm) 159.2, 158.3, 151.9, 143.6, 137.7, 136.1, 135.1, 133.5, 132.4, 129.6, 128.4, 128.2, 128.0, 127.9, 127.8, 127.6, 126.9, 126.7, 125.6, 122.6, 120.9, 119.5, 118.1, 116.8, 110.5, 103.3, 102.5, 87.1. HRMS (ESI): exact mass calculated for  $[\text{M}+\text{H}]^+$  ( $\text{C}_{32}\text{H}_{21}\text{ClNO}_3$ ) requires  $m/z$  502.1204, found  $m/z$  502.1206.

### 2-(1H-indol-6-yl)-9-methyl-2,4-diphenylpyrano[3,2-c]chromen-5(2H)-one (3ac)

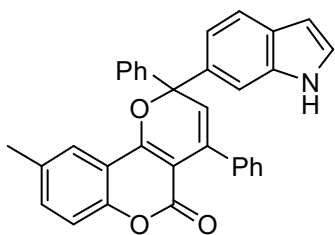

Eluent for flash column chromatography: petroleum ether/ethyl acetate = 15:1. White solid, 21.8 mg, 91% yield. Mp 122.6-127.6 °C.  $^1\text{H}$  NMR ( $\text{CDCl}_3$ , 500 MHz):  $\square$  (ppm) 8.28 (s, 1H), 7.80 (s, 1H), 7.60-7.58 (m, 2H), 7.51 (d,  $J = 10.0$  Hz, 2H), 7.44-7.43 (m, 2H), 7.38-7.31 (m, 7H), 7.22-7.20 (m, 2H), 7.16-7.14 (d,  $J = 10.0$  Hz, 1H), 6.52 (s, 1H), 6.01 (s, 1H), 2.44 (s, 3H).  $^{13}\text{C}$  NMR ( $\text{CDCl}_3$ , 126 MHz):  $\square$  (ppm) 160.4, 159.0, 151.8, 143.9, 138.1, 136.5, 135.1, 133.9, 133.8, 133.6, 128.3, 128.0, 127.9, 127.8, 127.7, 127.6, 126.9, 126.0, 125.5, 122.8, 120.8, 119.5, 116.4, 115.3, 110.6, 102.5, 102.4, 86.7, 21.0. HRMS (ESI): exact mass calculated for  $[\text{M}+\text{H}]^+$  ( $\text{C}_{33}\text{H}_{24}\text{NO}_3$ ) requires  $m/z$  482.1751, found  $m/z$  482.1752.

### 8-Chloro-2-(1H-indol-6-yl)-2,4-diphenylpyrano[3,2-c]chromen-5(2H)-one (3ad)

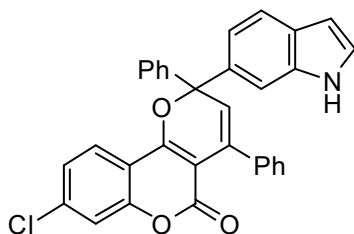

Eluent for flash column chromatography: petroleum ether/ethyl acetate = 15:1. White solid, 21.7 mg, 87% yield. Mp 150.2-156.9 °C.  $^1\text{H}$  NMR ( $\text{CDCl}_3$ , 500 MHz):  $\square$  (ppm) 8.25 (s, 1H), 7.95 (d,  $J = 10.0$  Hz, 1H), 7.59 (d,  $J = 10.0$  Hz, 1H), 7.55 (s, 1H), 7.49-7.48 (m, 2H), 7.44-7.42 (m, 2H), 7.39-7.27 (m, 8H), 7.21 (t,  $J = 10.0$  Hz, 1H), 7.19-7.17 (m, 1H), 6.52 (s, 1H), 6.04 (s, 1H).  $^{13}\text{C}$  NMR ( $\text{CDCl}_3$ , 126 MHz):  $\square$  (ppm) 159.9, 158.3, 153.8, 143.7, 138.4, 137.7, 136.2, 135.1, 133.5, 128.3, 128.1, 128.0, 127.9, 127.8, 127.6, 126.8, 126.4, 125.6, 124.7, 124.3, 120.9, 119.4, 116.9, 114.3, 110.5, 102.6, 102.5, 87.0. HRMS (ESI): exact mass calculated for  $[\text{M}+\text{H}]^+$  ( $\text{C}_{32}\text{H}_{21}\text{ClNO}_3$ ) requires  $m/z$  502.1204, found  $m/z$  502.1206.

### 2-(1H-indol-6-yl)-8-methyl-2,4-diphenylpyrano[3,2-c]chromen-5(2H)-one (3ae)

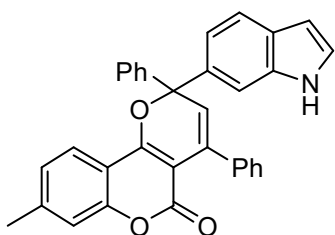

Eluent for flash column chromatography: petroleum ether/ethyl acetate = 15:1. White solid, 23.0 mg, 96% yield. Mp 163.5-168.6 °C.  $^1\text{H}$  NMR ( $\text{CDCl}_3$ , 500 MHz):  $\square$  (ppm) 8.25 (s, 1H), 7.92 (d,  $J = 5.0$  Hz, 1H), 7.59-7.57 (m, 2H), 7.51 (d,  $J = 5.0$  Hz, 2H), 7.44-7.43 (m, 2H), 7.38-7.30 (m, 6H), 7.20-7.18 (m, 2H), 7.11 (d,  $J = 10.0$

Hz, 1H), 7.06 (s, 1H), 6.51 (s, 1H), 6.00 (s, 1H), 2.43 (s, 3H).  $^{13}\text{C}$  NMR ( $\text{CDCl}_3$ , 126 MHz):  $\square$  (ppm) 160.7, 159.1, 153.8, 144.0, 143.9, 138.1, 136.5, 135.1, 133.9, 128.2, 127.9, 127.8, 127.7, 127.6, 127.5, 126.8, 125.8, 125.5, 125.3, 123.1, 120.8, 119.5, 116.8, 113.1, 110.5, 102.4, 101.8, 86.6, 21.9. HRMS (ESI): exact mass calculated for  $[\text{M}+\text{H}]^+$  ( $\text{C}_{33}\text{H}_{24}\text{NO}_3$ ) requires  $m/z$  482.1751, found  $m/z$  482.1753.

#### 2-(1*H*-indol-6-yl)-2,4-diphenyl-7,8-dihydro-2*H*-chromen-5(6*H*)-one (5aa)

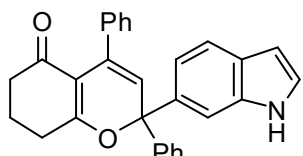

Eluent for flash column chromatography: petroleum ether/ethyl acetate = 7:1. White solid, 18.9 mg, 91% yield. Mp 192.3-194.4 °C.  $^1\text{H}$  NMR ( $(\text{CD}_3)_2\text{SO}$ , 500 MHz):  $\square$  (ppm) 11.11 (s, 1H), 7.50 (d,  $J = 10.0$  Hz, 1H), 7.46-7.44 (m, 3H), 7.38-7.35 (m, 3H), 7.31-7.25 (m, 6H), 7.02-7.00 (m, 1H), 6.39 (s, 1H), 5.94 (s, 1H), 2.70-2.54 (m, 2H), 2.18-2.15 (m, 2H), 1.95-1.93 (m, 2H).  $^{13}\text{C}$  NMR ( $(\text{CD}_3)_2\text{SO}$ , 126 MHz):  $\square$  (ppm) 193.0, 173.3, 145.0, 139.7, 136.9, 135.7, 133.9, 128.6, 128.0, 127.9, 127.6, 127.4, 126.8, 126.5, 124.0, 120.4, 118.4, 113.6, 110.3, 101.4, 85.4, 37.5, 29.2, 19.9. HRMS (ESI): exact mass calculated for  $[\text{M}+\text{H}]^+$  ( $\text{C}_{29}\text{H}_{24}\text{NO}_2$ ) requires  $m/z$  418.1802, found  $m/z$  418.1801.

#### 4-(4-Chlorophenyl)-2-(1*H*-indol-6-yl)-2-phenyl-7,8-dihydro-2*H*-chromen-5(6*H*)-one (5ca)

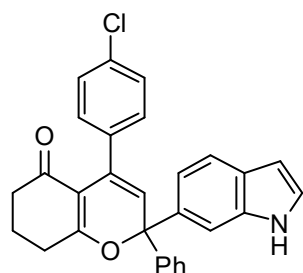

Eluent for flash column chromatography: petroleum ether/ethyl acetate = 8:1. White solid, 20.2 mg, 90% yield. Mp 205.7-207.5 °C.  $^1\text{H}$  NMR ( $\text{CDCl}_3$ , 500 MHz):  $\square$  (ppm) 8.25 (s, 1H), 7.60 (d,  $J = 5.0$  Hz, 1H), 7.47 (s, 1H), 7.42-7.40 (m, 2H), 7.35-7.27 (m, 6H), 7.23-7.22 (m, 1H), 7.12-7.10 (m, 1H), 6.54 (s, 1H), 5.74 (s, 1H), 2.65-2.46 (m, 2H), 2.33-2.19 (m, 2H), 2.04-1.97 (m, 2H).  $^{13}\text{C}$  NMR ( $\text{CDCl}_3$ , 126 MHz):  $\square$  (ppm) 193.7, 173.4, 144.3, 137.9, 136.9, 135.2, 133.3, 132.9, 128.5, 128.2, 127.9, 127.7, 127.5, 126.7, 125.3, 123.5, 120.7, 119.5, 113.6, 110.3, 102.4, 86.0, 37.3, 29.4, 19.9. HRMS (ESI): exact mass calculated for  $[\text{M}+\text{H}]^+$  ( $\text{C}_{29}\text{H}_{23}\text{ClNO}_2$ ) requires  $m/z$  452.1412, found  $m/z$  452.1414.

#### 2-(1*H*-indol-6-yl)-2-phenyl-4-(*p*-tolyl)-7,8-dihydro-2*H*-chromen-5(6*H*)-one (5ea)

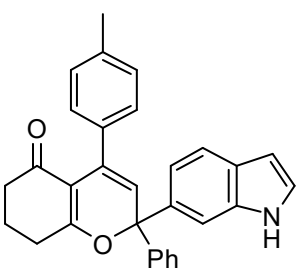

Eluent for flash column chromatography: petroleum ether/ethyl acetate = 8:1. White solid, 20.3 mg, 94% yield. Mp 135.1-137.5 °C.  $^1\text{H}$  NMR ( $\text{CDCl}_3$ , 500 MHz):  $\square$  (ppm) 8.22 (s, 1H), 7.57 (d,  $J = 5.0$  Hz, 1H), 7.48 (s, 1H), 7.42-7.40 (m, 2H), 7.33-7.27 (m, 3H), 7.22-7.19 (m, 3H), 7.13-7.10 (m, 3H), 6.52 (s, 1H), 5.72 (s, 1H), 2.63-2.44 (m, 2H), 2.34 (s, 3H), 2.27-2.18 (m, 2H), 2.03-1.96 (m, 2H).  $^{13}\text{C}$  NMR ( $\text{CDCl}_3$ , 126 MHz):  $\square$  (ppm) 193.8, 173.0, 144.6, 137.2, 136.9, 136.5, 135.1, 134.2, 128.5, 128.1, 127.6, 127.4, 126.9, 126.8, 125.2, 122.7, 120.6, 119.7, 114.1,

110.5, 102.3, 86.0, 37.4, 29.4, 21.3, 20.0. HRMS (ESI): exact mass calculated for  $[M+H]^+$  ( $C_{30}H_{26}NO_2$ ) requires  $m/z$  432.1958, found  $m/z$  432.1963.

**4-(3-Chlorophenyl)-2-(1*H*-indol-6-yl)-2-phenyl-7,8-dihydro-2*H*-chromen-5(6*H*)-one (5ha)**

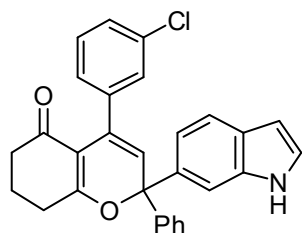

Eluent for flash column chromatography: petroleum ether/ethyl acetate = 8:1. White solid, 18.9 mg, 84% yield. Mp 98.8-100.7 °C.  $^1H$  NMR ( $CDCl_3$ , 500 MHz):  $\delta$  (ppm) 8.25 (s, 1H), 7.59 (d,  $J = 5.0$  Hz, 1H), 7.46 (s, 1H), 7.41-7.39 (m, 2H), 7.34-7.27 (m, 4H), 7.24-7.21 (m, 3H), 7.17-7.15 (m, 1H), 7.10-7.09 (m, 1H), 6.53 (s, 1H), 5.74 (s, 1H), 2.63-2.45 (m, 2H), 2.33-2.18 (m, 2H), 2.05-1.97 (m, 2H).  $^{13}C$  NMR ( $CDCl_3$ , 126 MHz):  $\delta$  (ppm) 193.6, 173.4, 144.2, 141.4, 136.8, 135.2, 133.6, 133.2, 128.8, 128.2, 127.7, 127.6, 127.3, 127.2, 126.7, 125.5, 125.3, 124.0, 120.7, 119.5, 113.6, 110.4, 102.4, 86.0, 37.3, 29.4, 19.9. HRMS (ESI): exact mass calculated for  $[M+H]^+$  ( $C_{29}H_{23}ClNO_2$ ) requires  $m/z$  452.1412, found  $m/z$  452.1416.

**2-(1*H*-indol-6-yl)-4-(3-methoxyphenyl)-2-phenyl-7,8-dihydro-2*H*-chromen-5(6*H*)-one (5ka)**

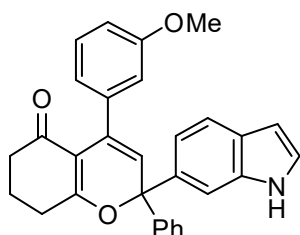

Eluent for flash column chromatography: petroleum ether/ethyl acetate = 6:1. White solid, 19.4 mg, 87% yield. Mp 71.1-73.8 °C.  $^1H$  NMR ( $CDCl_3$ , 500 MHz):  $\delta$  (ppm) 8.23 (s, 1H), 7.57 (d,  $J = 10.0$  Hz, 1H), 7.50 (s, 1H), 7.41-7.40 (m, 2H), 7.33-7.27 (m, 3H), 7.23-7.21 (m, 2H), 7.11-7.09 (m, 1H), 6.90-6.88 (m, 2H), 6.83-6.82 (m, 1H), 6.52 (s, 1H), 5.76 (s, 1H), 3.81 (s, 3H), 2.62-2.45 (m, 2H), 2.31-2.19 (m, 2H), 2.03-1.96 (m, 2H).  $^{13}C$  NMR ( $CDCl_3$ , 126 MHz):  $\delta$  (ppm) 193.5, 172.9, 159.1, 144.4, 140.9, 137.1, 135.2, 134.2, 128.6, 128.1, 127.6, 127.5, 126.7, 125.2, 123.3, 120.6, 119.9, 119.6, 114.1, 113.4, 112.2, 110.4, 102.4, 86.0, 55.2, 37.3, 29.4, 19.9. HRMS (ESI): exact mass calculated for  $[M+H]^+$  ( $C_{30}H_{26}NO_3$ ) requires  $m/z$  448.1907, found  $m/z$  448.1911.

**2-(1*H*-indol-6-yl)-2-phenyl-4-(*o*-tolyl)-7,8-dihydro-2*H*-chromen-5(6*H*)-one (5ma)**

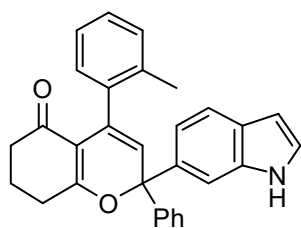

Eluent for flash column chromatography: petroleum ether/ethyl acetate = 8:1. White solid, 20.0 mg, 93% yield. Mp 114.0-117.3 °C.  $^1H$  NMR ( $(CD_3)_2SO$ , 500 MHz):  $\delta$  (ppm) 11.15 (s, 1H), 7.53 (d,  $J = 10.0$  Hz, 1H), 7.44-7.37 (m, 6H), 7.32-7.29 (m, 1H), 7.15-7.08 (m, 4H), 7.05-7.03 (m, 1H), 6.41 (s, 1H), 5.75 (s, 1H), 2.71-2.60 (m, 2H), 2.13 (s, 5H), 1.92-1.87 (m, 2H).  $^{13}C$  NMR ( $CDCl_3$ , 126 MHz):  $\delta$  (ppm) 193.2, 171.8, 140.7, 135.8, 135.2, 133.2, 129.6, 128.7, 128.4, 127.9, 127.5, 126.9, 126.8, 126.5, 125.6, 123.7, 120.4, 118.4, 113.6, 110.2, 109.9, 101.4, 85.2, 37.4, 29.1, 20.4, 20.3. HRMS (ESI):

exact mass calculated for  $[M+H]^+$  ( $C_{30}H_{26}NO_2$ ) requires  $m/z$  432.1958, found  $m/z$  432.1964.

**2-(1*H*-indol-6-yl)-2-phenyl-4-(thiophen-3-yl)-7,8-dihydro-2*H*-chromen-5(6*H*)-one (5na)**

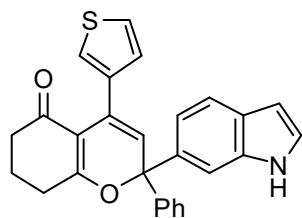

Eluent for flash column chromatography: petroleum ether/ethyl acetate = 8:1. White solid, 17.3 mg, 82% yield. Mp 208.6-212.0 °C.  $^1H$  NMR ( $(CD_3)_2SO$ , 500 MHz):  $\square$  (ppm) 11.11 (s, 1H), 7.50 (d,  $J = 10.0$  Hz, 1H), 7.46-7.43 (m, 4H), 7.39-7.35 (m, 4H), 7.31-7.28 (m, 1H), 7.04-7.00 (m, 2H), 6.40 (s, 1H), 6.06 (s, 1H), 2.68-2.53 (m, 2H), 2.19-2.16 (m, 2H), 1.94-1.92 (m, 2H).  $^{13}C$  NMR ( $CDCl_3$ , 126 MHz):  $\square$  (ppm) 193.2, 173.0, 144.9, 140.0, 136.9, 135.7, 128.7, 128.6, 128.5, 128.0, 127.6, 126.8, 126.6, 124.6, 123.1, 122.1, 120.3, 118.4, 113.9, 110.3, 101.4, 85.3, 37.5, 29.2, 19.9. HRMS (ESI): exact mass calculated for  $[M+H]^+$  ( $C_{27}H_{22}NO_2S$ ) requires  $m/z$  424.1366, found  $m/z$  424.1371.

**2-(4-Fluorophenyl)-2-(1*H*-indol-6-yl)-4-phenyl-7,8-dihydro-2*H*-chromen-5(6*H*)-one (5va)**

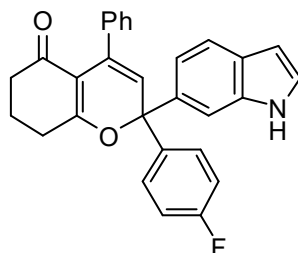

Eluent for flash column chromatography: petroleum ether/ethyl acetate = 8:1. White solid, 19.3 mg, 89% yield. Mp 155.5-158.7 °C.  $^1H$  NMR ( $CDCl_3$ , 500 MHz):  $\square$  (ppm) 8.28 (s, 1H), 7.59 (d,  $J = 10.0$  Hz, 1H), 7.46 (s, 1H), 7.39-7.36 (m, 2H), 7.32-7.31 (m, 4H), 7.29-7.28 (m, 1H), 7.21-7.19 (m, 1H), 7.08 (d,  $J = 10.0$  Hz, 1H), 7.01-6.98 (m, 2H), 6.52 (s, 1H), 5.70 (s, 1H), 2.60-2.44 (m, 2H), 2.32-2.17 (m, 2H), 2.03-1.98 (m, 2H).  $^{13}C$  NMR ( $CDCl_3$ , 126 MHz):  $\square$  (ppm) 193.8, 173.0, 162.1 (d,  $J = 246.9$  Hz), 140.31, 139.3, 136.8, 135.2, 134.5, 128.7 (d,  $J = 7.6$  Hz), 127.8, 127.5, 127.4, 127.1, 125.4, 122.9, 120.7, 119.4, 114.9 (d,  $J = 21.4$  Hz), 114.1, 110.4, 102.3, 85.6, 37.3, 29.4, 19.9. HRMS (ESI): exact mass calculated for  $[M+H]^+$  ( $C_{29}H_{23}FNO_2$ ) requires  $m/z$  436.1707, found  $m/z$  436.1714.

**2-(1*H*-indol-6-yl)-2-(4-methoxyphenyl)-4-phenyl-7,8-dihydro-2*H*-chromen-5(6*H*)-one (5wa)**

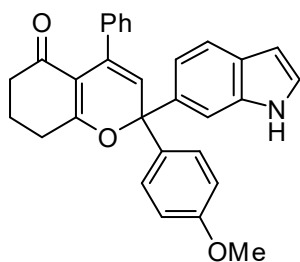

Eluent for flash column chromatography: petroleum ether/ethyl acetate = 6:1. White solid, 19.8 mg, 89% yield. Mp 73.5-75.7 °C.  $^1H$  NMR ( $CDCl_3$ , 500 MHz):  $\square$  (ppm) 8.26 (s, 1H), 7.58 (d,  $J = 10.0$  Hz, 1H), 7.46 (s, 1H), 7.33-7.28 (m, 7H), 7.20-7.19 (m, 1H), 7.12-7.10 (m, 1H), 6.85-6.82 (m, 2H), 6.52 (s, 1H), 5.72 (s, 1H), 3.79 (s, 3H), 2.55-2.50 (m, 2H), 2.28-2.23 (m, 2H), 2.00-1.98 (m, 2H).  $^{13}C$  NMR ( $CDCl_3$ , 126 MHz):  $\square$  (ppm) 193.8, 173.2, 159.0, 139.5, 137.4, 136.5, 135.2,

134.1, 128.3, 127.7, 127.4, 127.2, 127.1, 125.2, 123.4, 120.5, 119.5, 113.9, 113.4, 110.3, 102.3, 85.9, 55.3, 37.4, 29.4, 20.0. HRMS (ESI): exact mass calculated for  $[M+H]^+$  ( $C_{30}H_{26}NO_3$ ) requires  $m/z$  448.1907, found  $m/z$  448.14913.

**2-(1*H*-indol-6-yl)-7,7-dimethyl-2,4-diphenyl-7,8-dihydro-2*H*-chromen-5(6*H*)-one (5ab)**

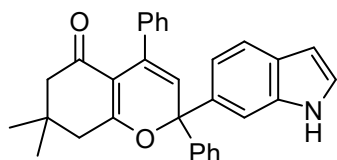

Eluent for flash column chromatography: petroleum ether/ethyl acetate = 8:1. White solid, 11.6 mg, 52% yield. Mp 58.2-60.2 °C.  $^1H$  NMR ( $CDCl_3$ , 500 MHz):  $\square$  (ppm) 8.21 (s, 1H), 7.58 (d,  $J = 10.0$  Hz, 1H), 7.23 (s, 1H), 7.44-7.43 (m, 2H), 7.35-7.28 (m, 8H), 7.25-7.24 (m, 1H), 7.12 (d,  $J = 10.0$  Hz, 1H), 6.54 (s, 1H), 5.75 (s, 1H), 2.51-2.39 (m, 2H), 2.17-2.16 (m, 2H), 1.12 (s, 3H), 1.04 (s, 3H).  $^{13}C$  NMR ( $CDCl_3$ , 126 MHz):  $\square$  (ppm) 193.6, 171.6, 144.5, 139.5, 137.2, 135.1, 134.4, 128.1, 127.7, 127.6, 127.5, 127.3, 127.2, 126.7, 125.2, 123.1, 120.6, 119.6, 110.3, 102.4, 85.9, 51.4, 42.9, 31.7, 28.6, 28.0. HRMS (ESI): exact mass calculated for  $[M+H]^+$  ( $C_{31}H_{28}N_2O_2$ ) requires  $m/z$  446.2115, found  $m/z$  446.2108.



## E: Large Scale Reaction

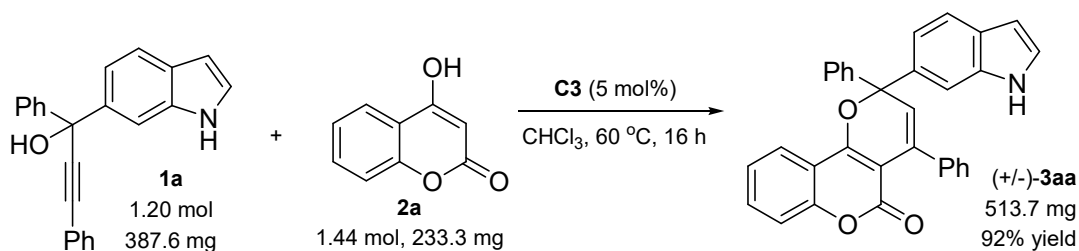

To a solution of  $\text{CHCl}_3$  (12.0 mL) were added **1a** (387.6 mg, 1.2 mmol), **2a** (233.3 mg, 1.4 mmol) and **C3** (3.6 mg, 0.06 mmol). The reaction mixture was stirred at  $60\text{ }^\circ\text{C}$  for 16 h. The solvent was evaporated to give the crude product, which was purified by silica gel chromatography (PE/EA = 4:1) to provide the desired product (+/-)-**3aa** as a white solid (513.7 mg, 92% yield).

## F: Control Experiments

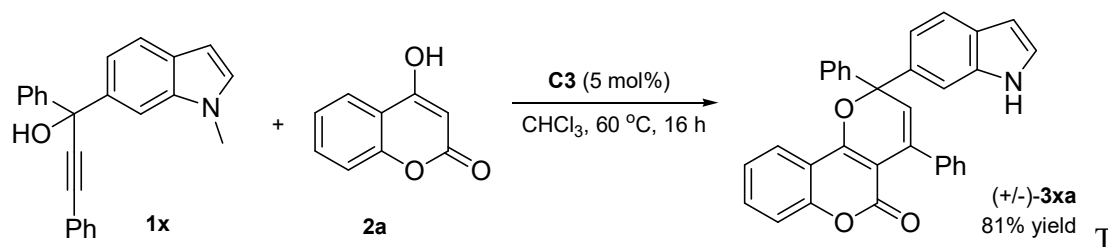

To a solution of  $\text{CHCl}_3$  (0.5 mL) were added **1x** (16.85 mg, 0.05 mmol), **2a** (11.58 mg, 0.06 mmol) and **C3** (0.15 mg, 0.0025 mmol). The reaction mixture was stirred at  $60\text{ }^\circ\text{C}$  for 16 h. The solvent was evaporated to give the crude product, which was purified by silica gel chromatography (PE/EA = 18:1) to provide the desired product (+/-)-**3xa** as a white solid (19.6 mg, 81% yield).

## 2-(1-Methyl-1H-indol-6-yl)-2,4-diphenylpyrano[3,2-c]chromen-5(2H)-one (**3xa**)

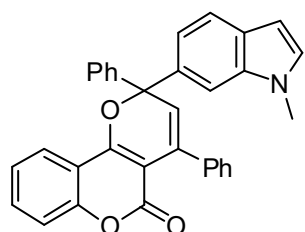

Eluent for flash column chromatography: petroleum ether/ethyl acetate = 18:1. White solid, 19.6 mg, 81% yield. Mp  $108.7\text{--}110.1\text{ }^\circ\text{C}$ .  $^1\text{H NMR}$  ( $\text{CDCl}_3$ , 500 MHz):  $\delta$  (ppm) 8.09 (d,  $J = 10.0\text{ Hz}$ , 1H), 7.59 (d,  $J = 10.0\text{ Hz}$ , 1H), 7.55-7.53 (m, 4H), 7.48-7.47 (m, 2H), 7.42-7.31 (m, 7H), 7.27 (d,  $J = 10.0\text{ Hz}$ , 1H), 7.20 (d,  $J = 10.0\text{ Hz}$ , 1H), 7.10-7.09 (m, 1H), 6.48-6.47 (m, 1H), 6.09 (s, 1H), 3.77 (s, 3H).  $^{13}\text{C NMR}$  ( $\text{CDCl}_3$ , 126 MHz):  $\delta$  (ppm) 160.4, 158.7, 153.6, 143.9, 138.1, 136.2, 136.0, 133.8, 132.5, 130.1, 128.3, 128.1, 127.9, 127.9, 127.6, 126.9, 126.3, 124.0, 123.3, 120.9, 118.9, 116.7, 115.7, 108.3, 102.8, 100.9, 86.8, 32.9. HRMS (ESI): exact mass calculated for  $[\text{M}+\text{H}]^+$  ( $\text{C}_{33}\text{H}_{24}\text{N}_2\text{O}_3$ ) requires  $m/z$  482.1751, found  $m/z$



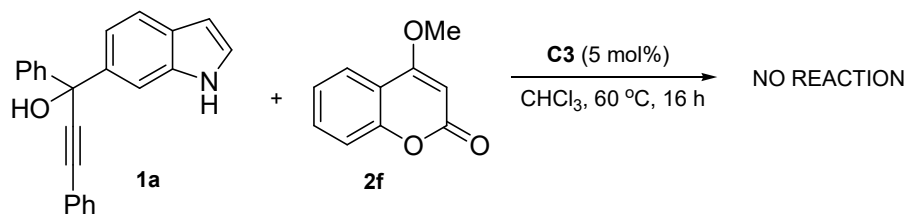

To a solution of  $\text{CHCl}_3$  (0.5 mL) were added **1a** (16.15 mg, 0.05 mmol), **2f** (10.56 mg, 0.06 mmol) **C3** (0.15 mg, 0.0025 mmol). The reaction mixture was stirred at 60 °C for 16 h. We found the reaction didn't occur.

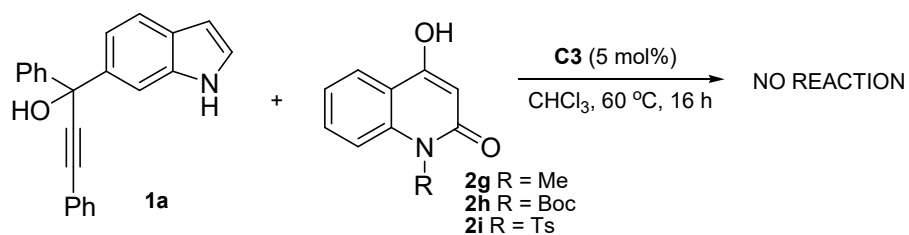

To a solution of  $\text{CHCl}_3$  (0.5 mL) were added **1a** (16.15 mg, 0.05 mmol), **2g-i** (0.06 mmol), **C3** (0.15 mg, 0.0025 mmol). The reaction mixture was stirred at 60 °C for 16 h. We found the reaction didn't occur.

## G: ESI-MS Studies

a) ESI(+)-MS spectra for the reaction of catalyst **C3** and propargylic alcohol **1a** for 2 h; b) ESI(+)-MS spectra for the 1,10-conjugate addition of propargylic alcohol **1a** catalyzed by catalyst **C3** for 12 h. Other unidentified ions are likely to correspond to either impurities or side-reaction products.

a)

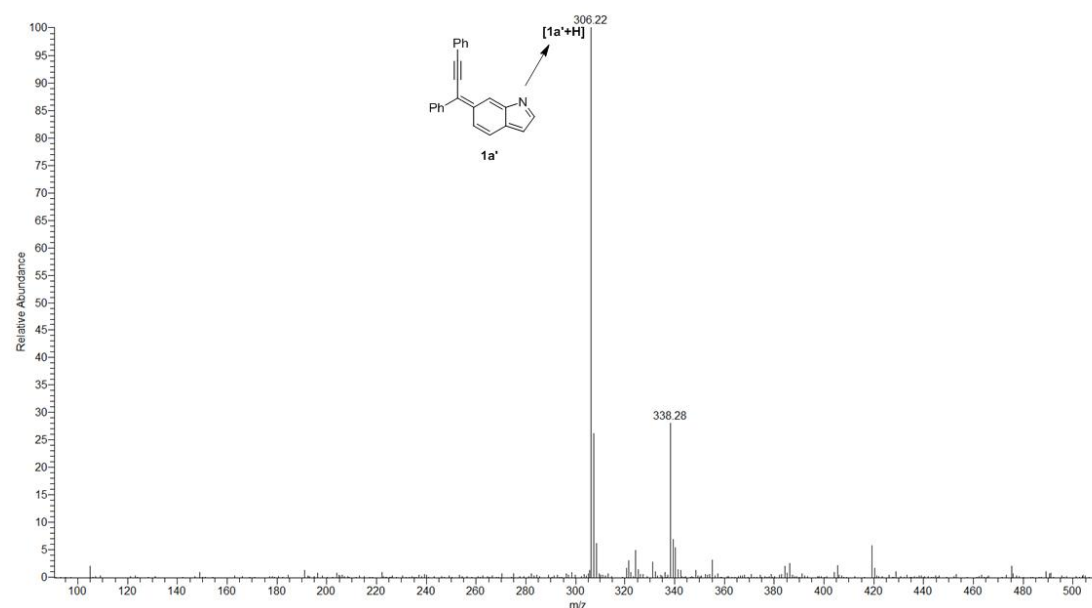

b)

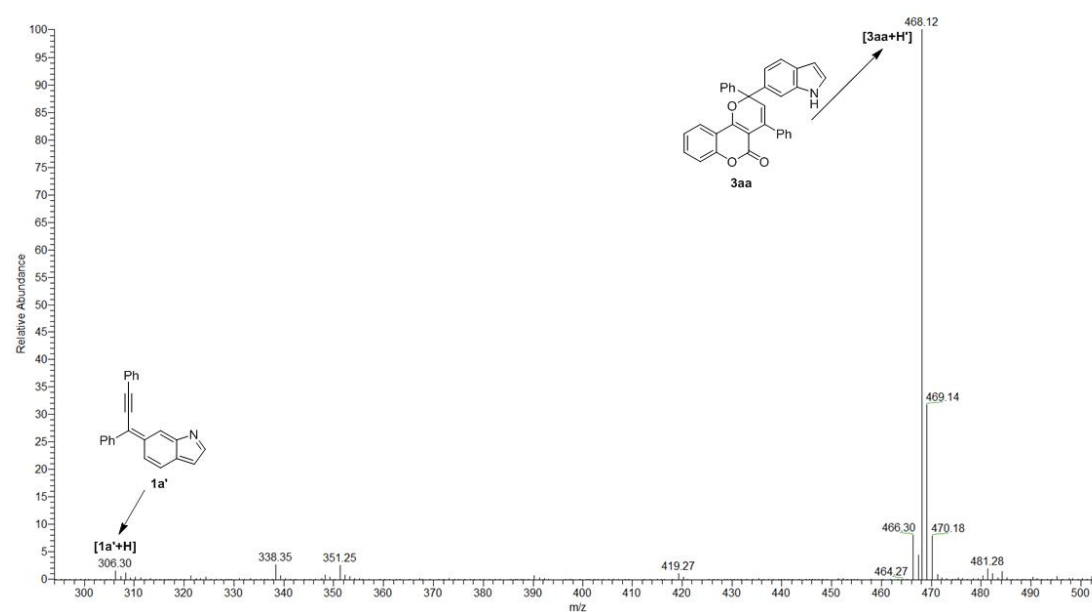







**4-(4-Bromophenyl)-2-(1*H*-indol-6-yl)-2-phenylpyrano[3,2-*c*]chromen-5(2*H*)-one  
(3da)**

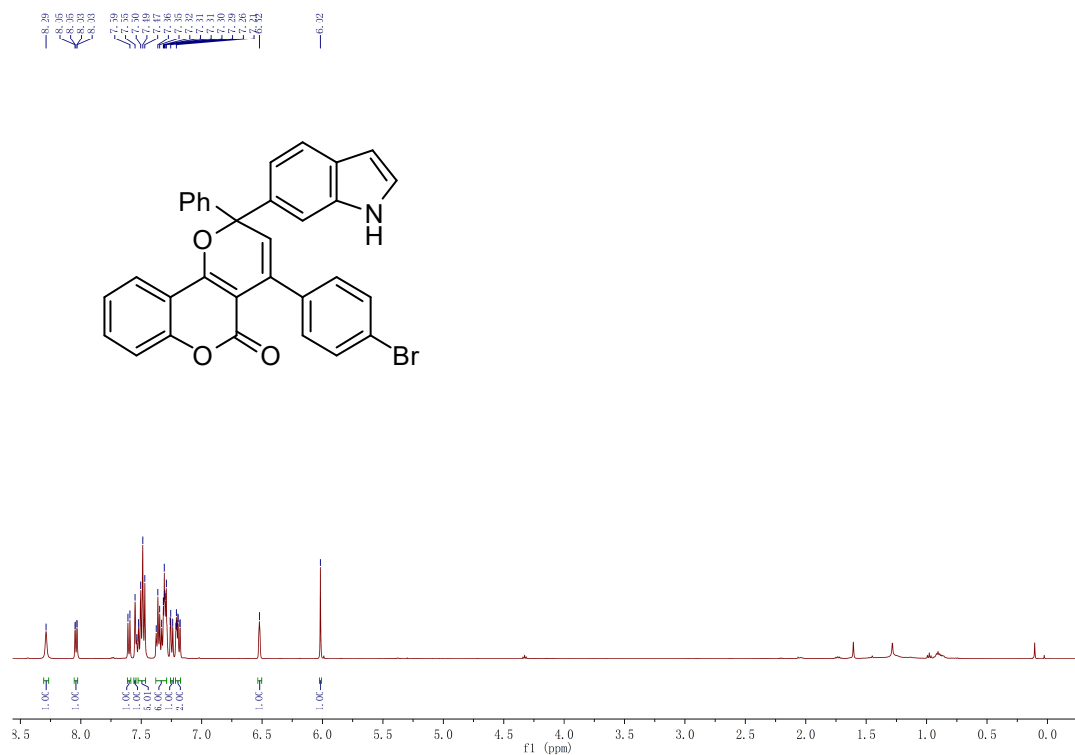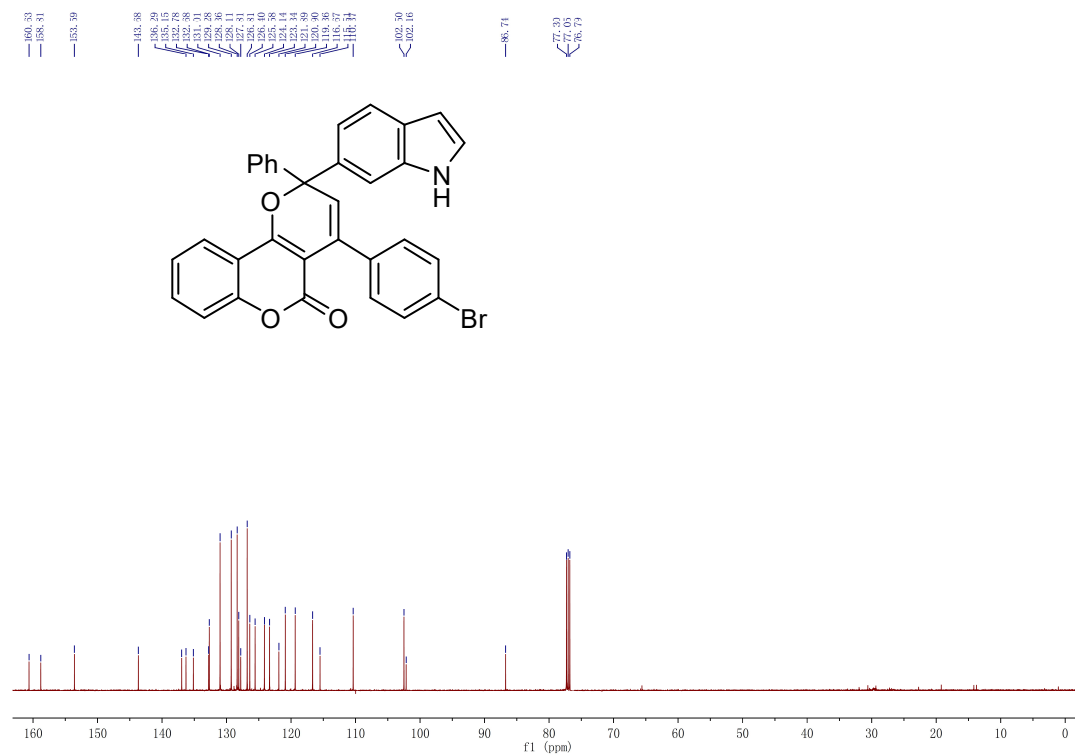



# 2-(1*H*-indol-6-yl)-2-phenyl-4-(*p*-tolyl)pyrano[3,2-*c*]chromen-5(2*H*)-one (3ea)

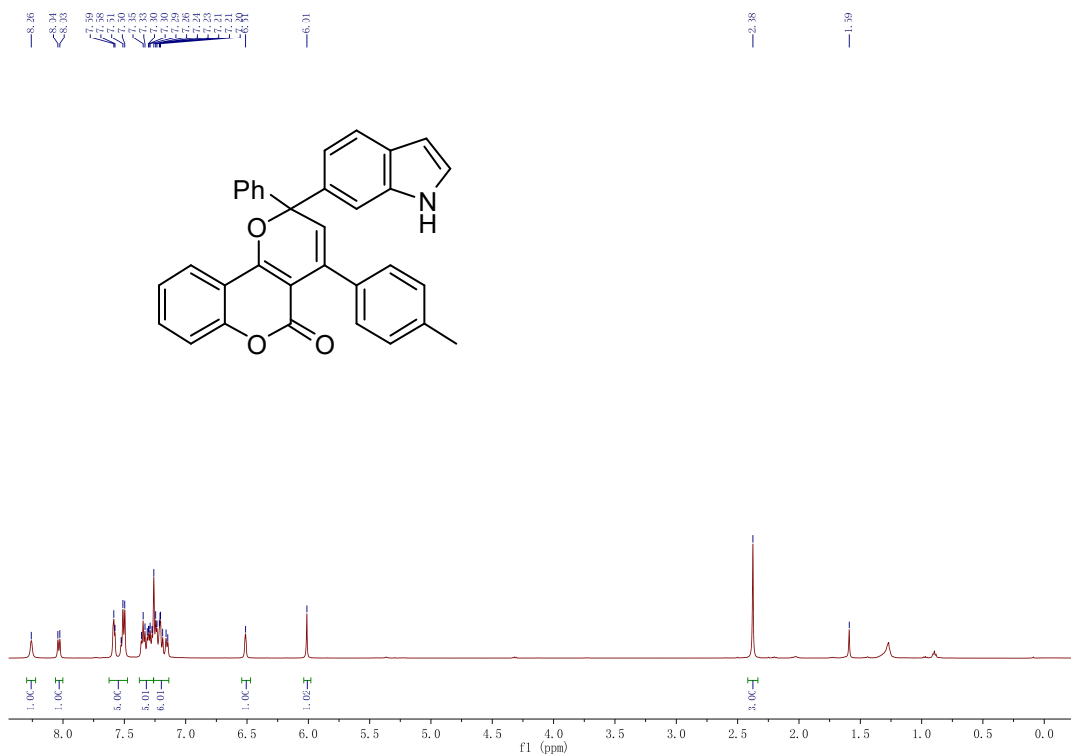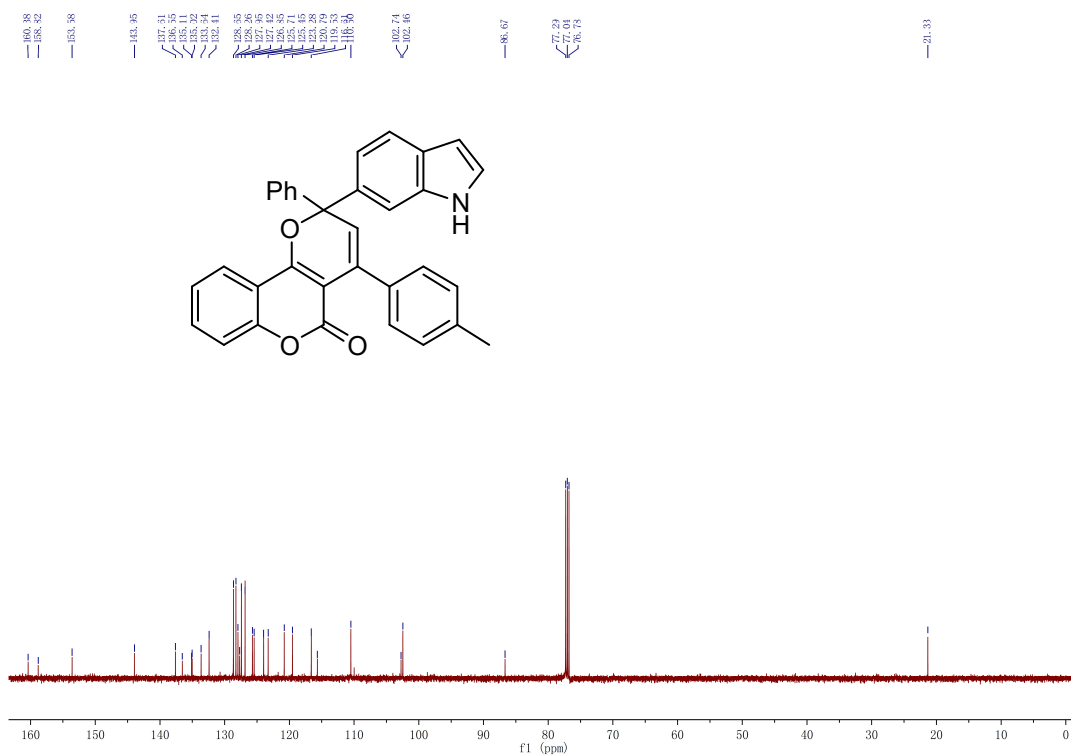

**2-(1*H*-indol-6-yl)-4-(4-methoxyphenyl)-2-phenylpyrano[3,2-*c*]chromen-5(2*H*)-one (3fa)**

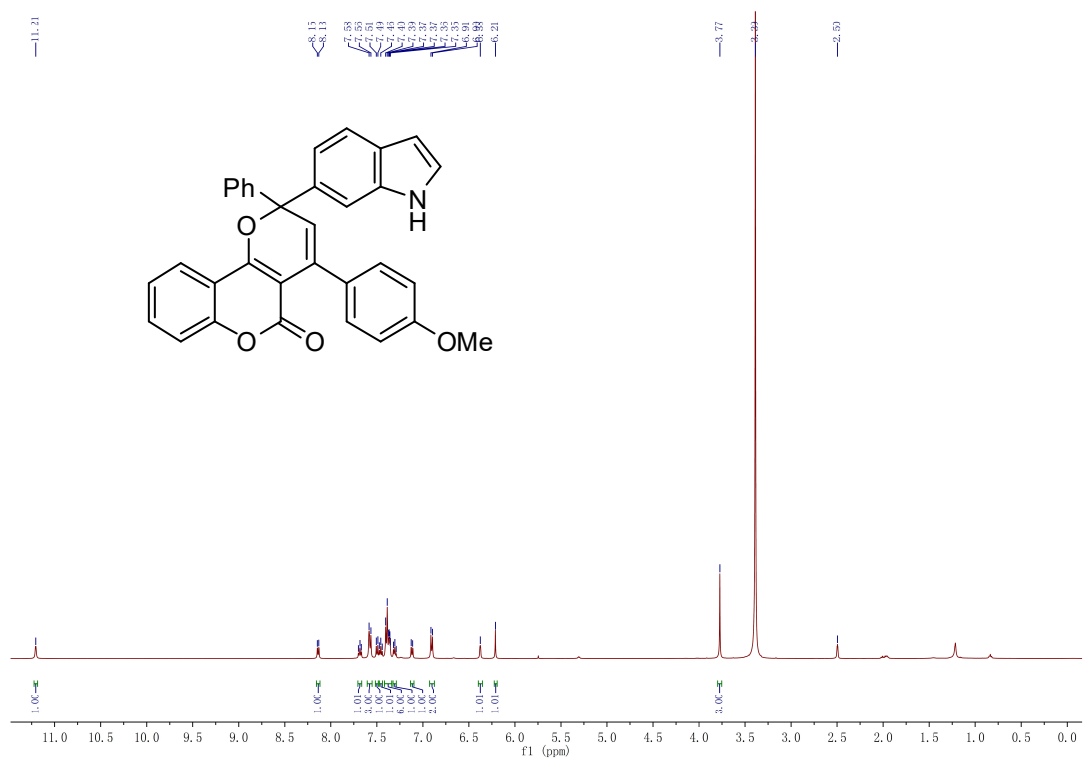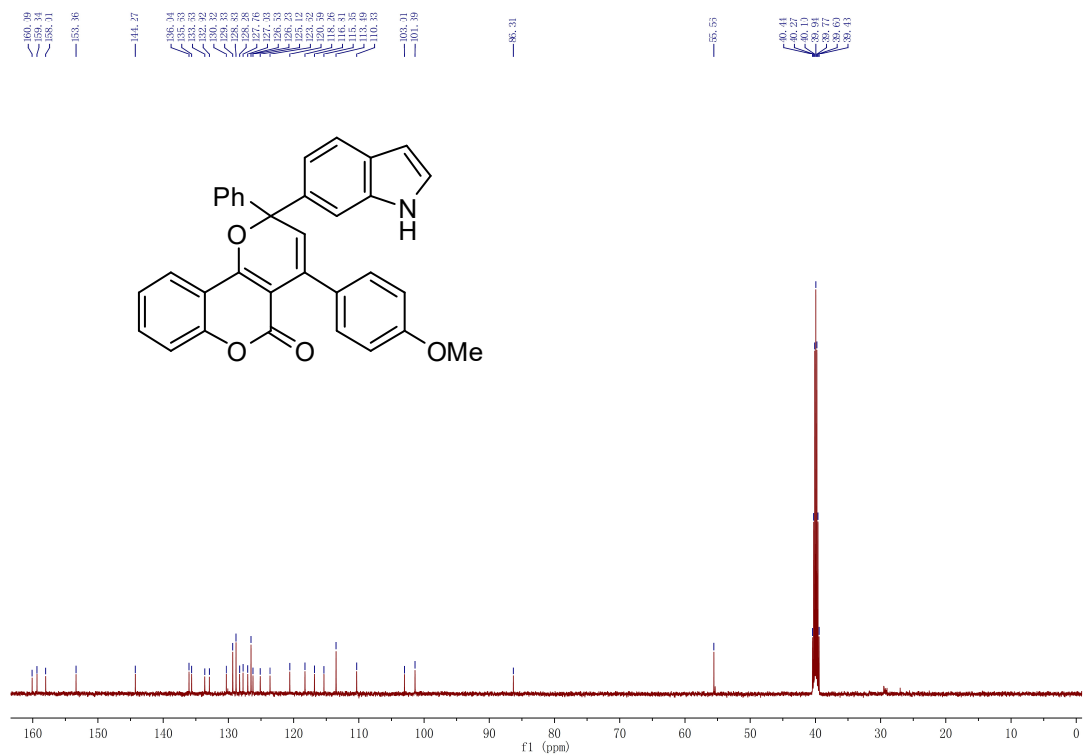

**4-(3-Fluorophenyl)-2-(1*H*-indol-6-yl)-2-phenylpyrano[3,2-*c*]chromen-5(2*H*)-one  
(3ga)**

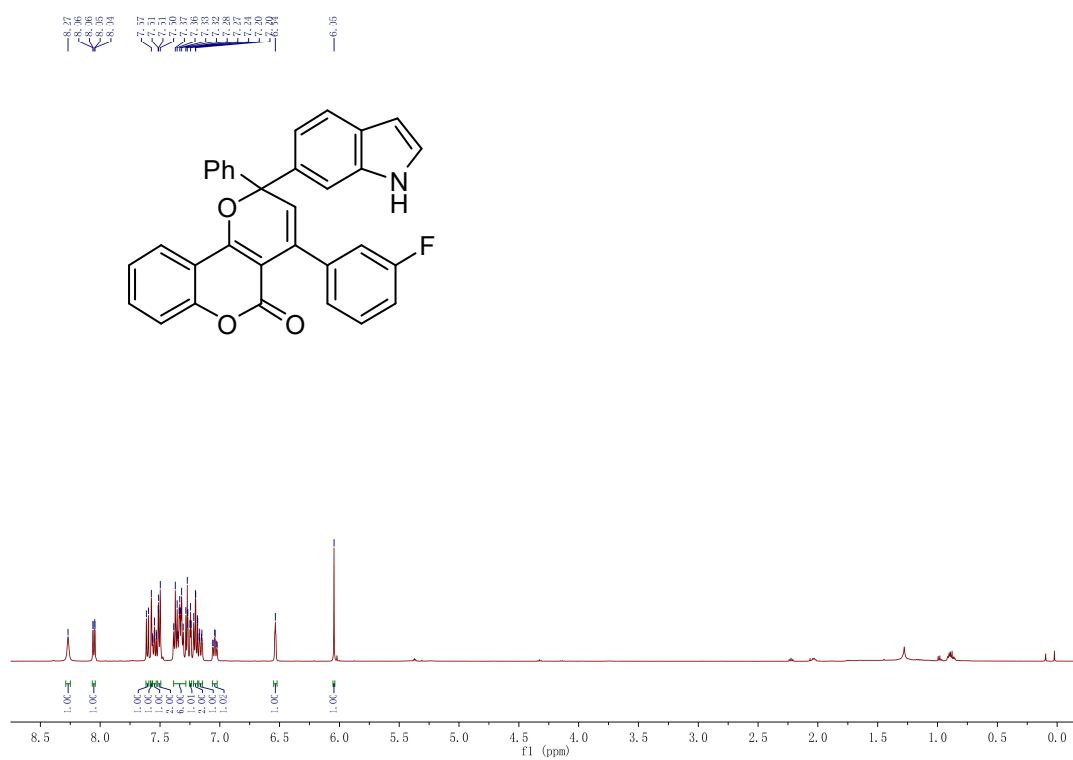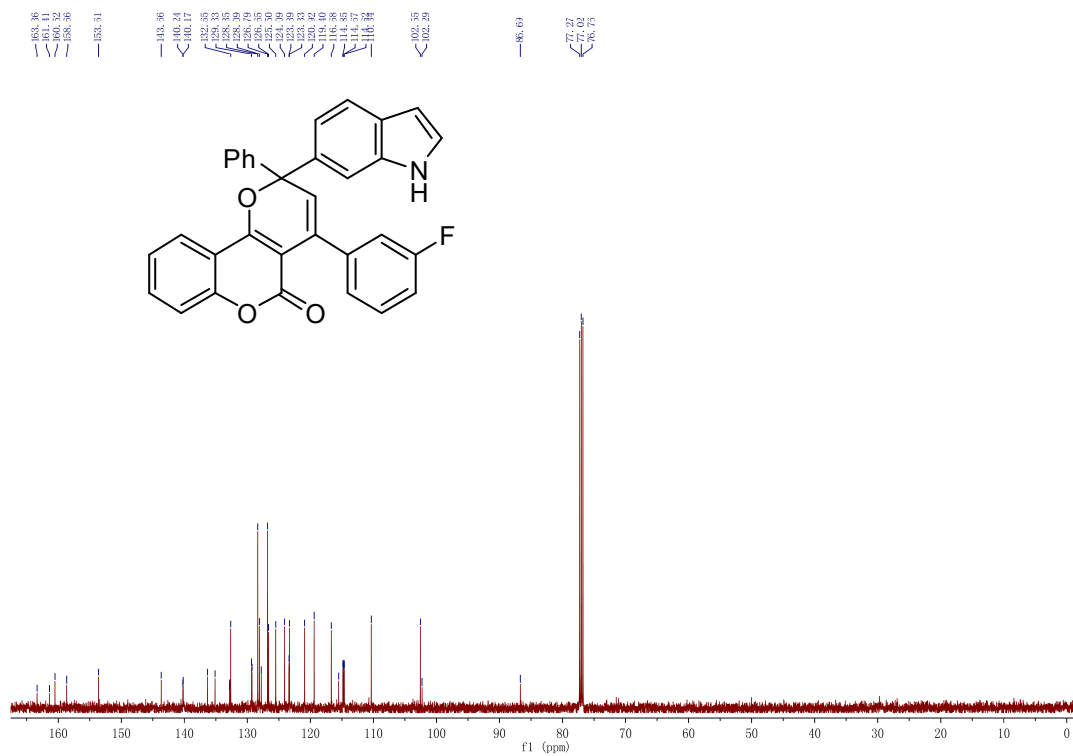



**4-(3-Bromophenyl)-2-(1*H*-indol-6-yl)-2-phenylpyrano[3,2-*c*]chromen-5(2*H*)-one  
(3ia)**

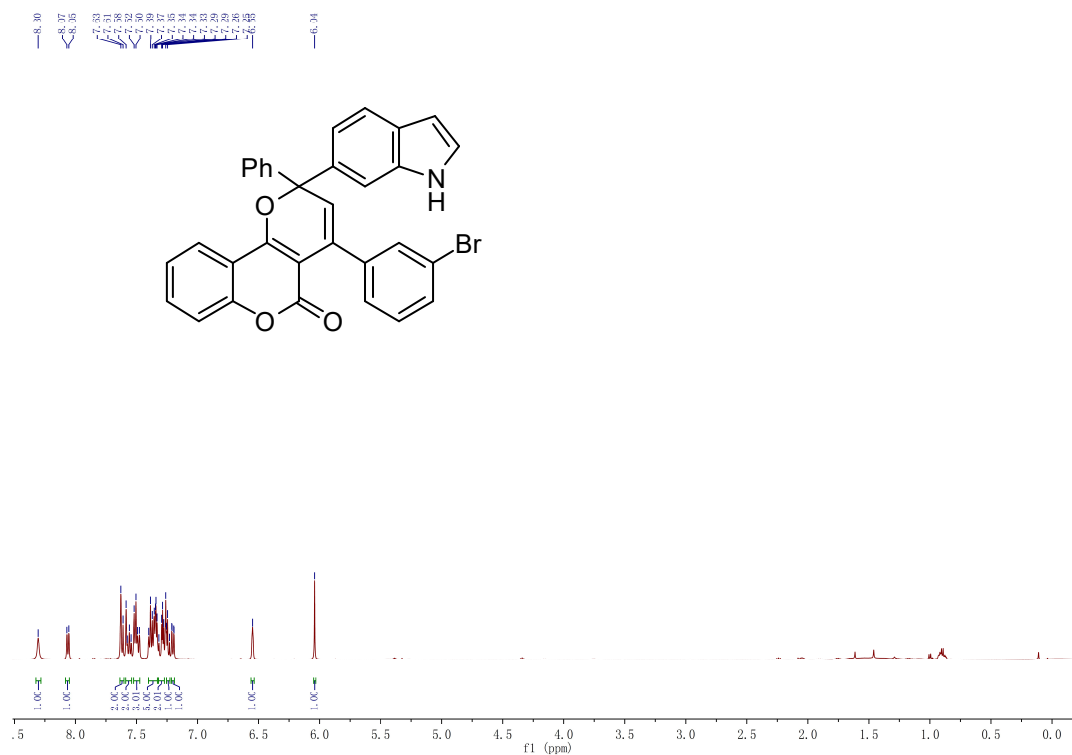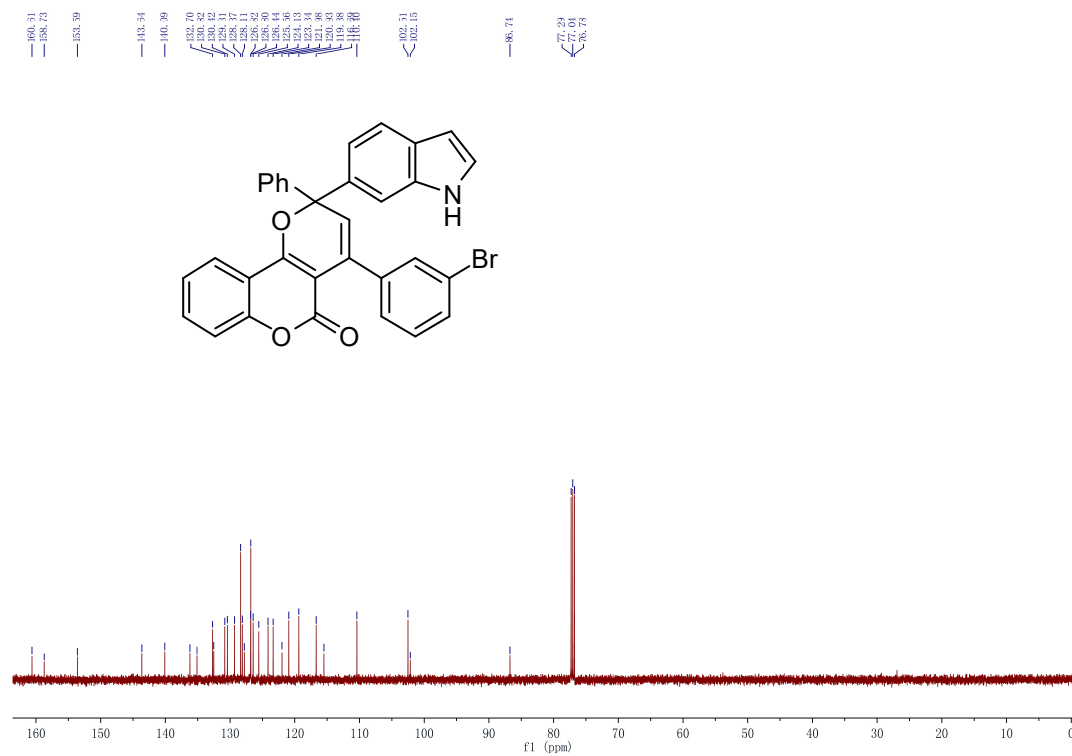

**2-(1*H*-indol-6-yl)-2-phenyl-4-(*m*-tolyl)pyrano[3,2-*c*]chromen-5(2*H*)-one (3ja)**

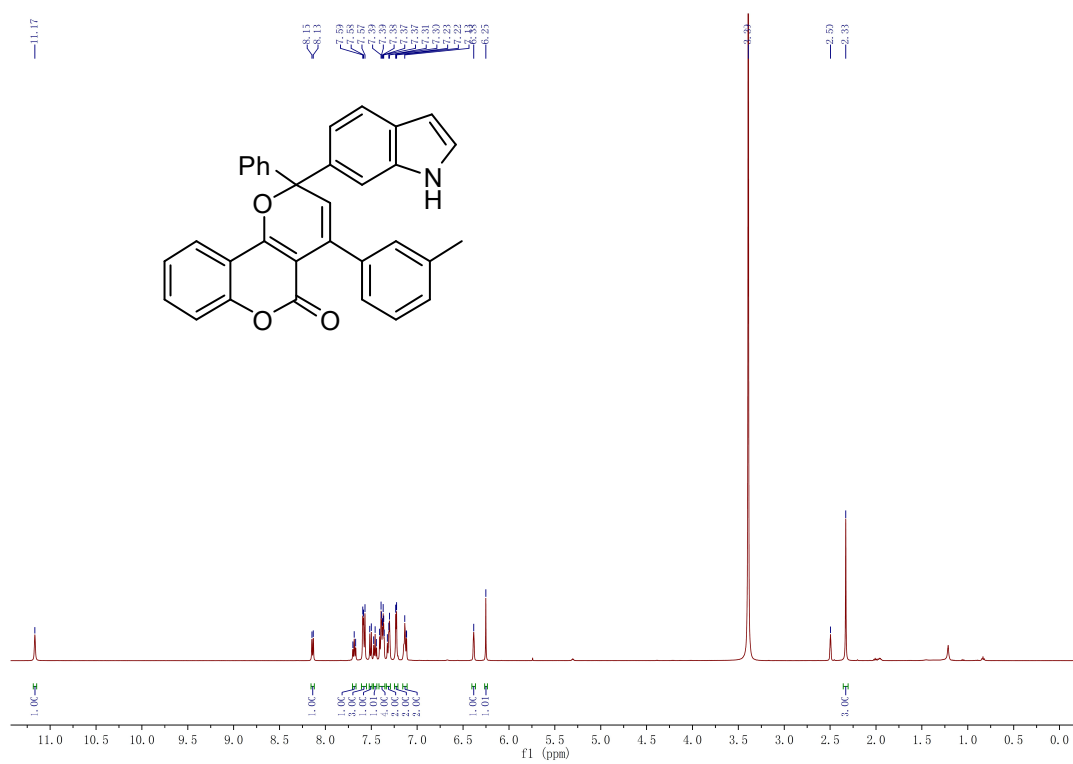

**2-(1*H*-indol-6-yl)-4-(3-methoxyphenyl)-2-phenylpyrano[3,2-*c*]chromen-5(2*H*)-one (3ka)**

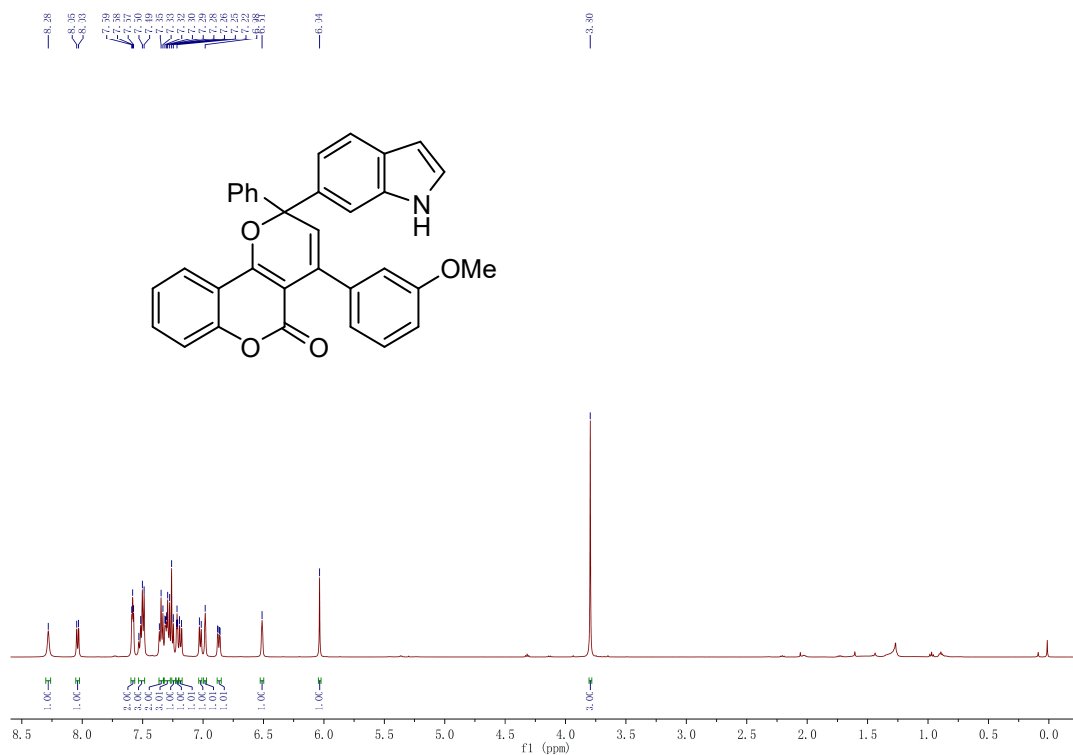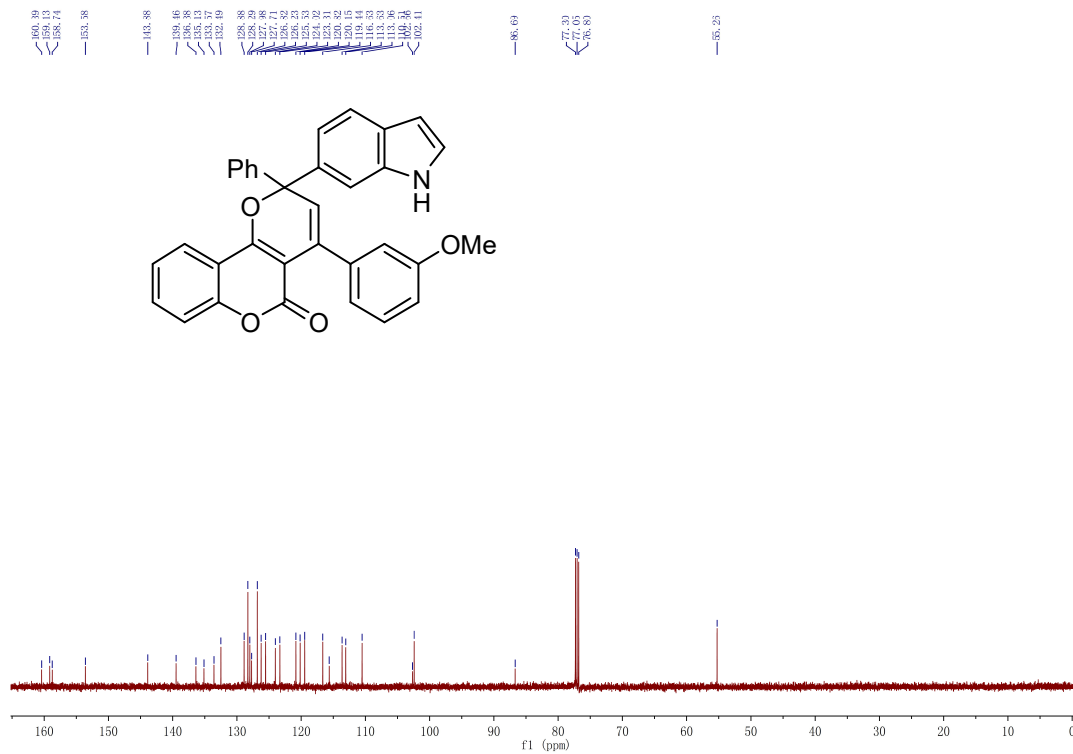

**4-(2-Fluorophenyl)-2-(1*H*-indol-6-yl)-2-phenylpyrano[3,2-*c*]chromen-5(2*H*)-one  
(3la)**

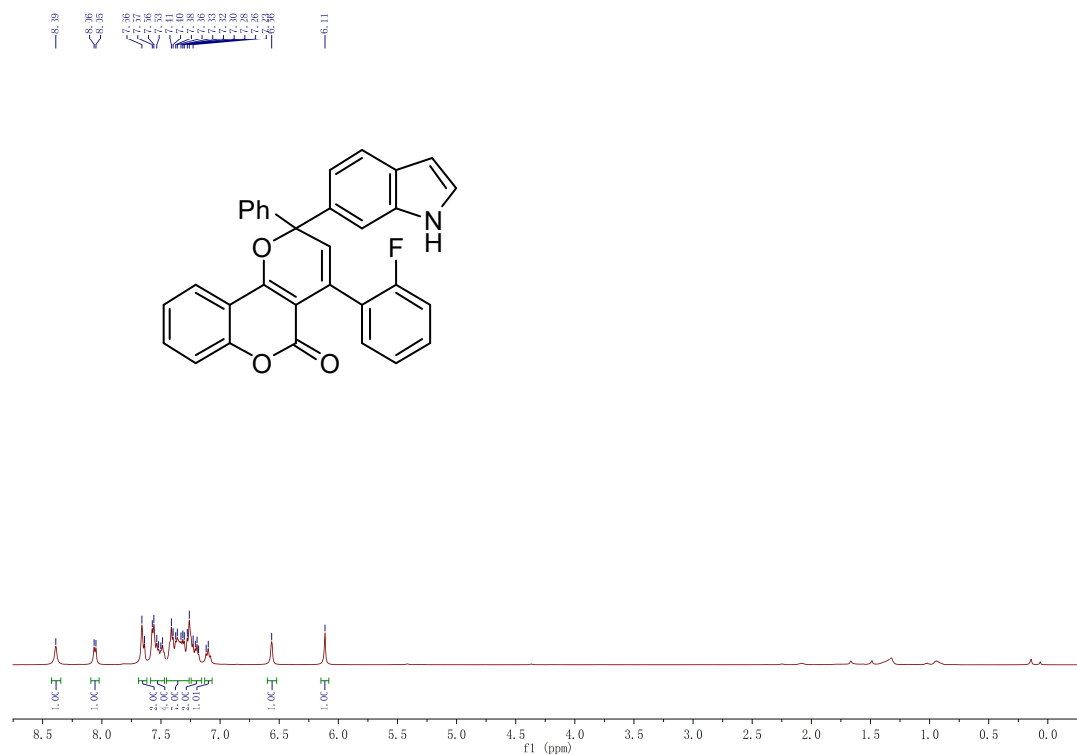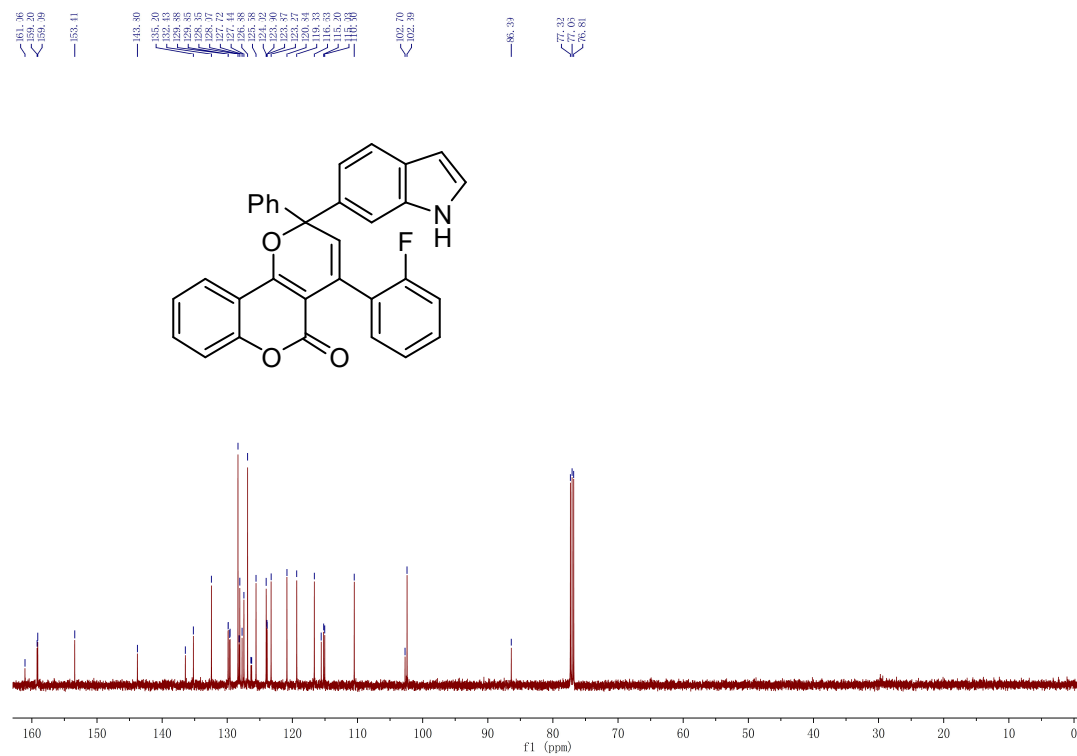



# 2-(1*H*-indol-6-yl)-2-phenyl-4-(*o*-tolyl)pyrano[3,2-*c*]chromen-5(2*H*)-one (3ma)

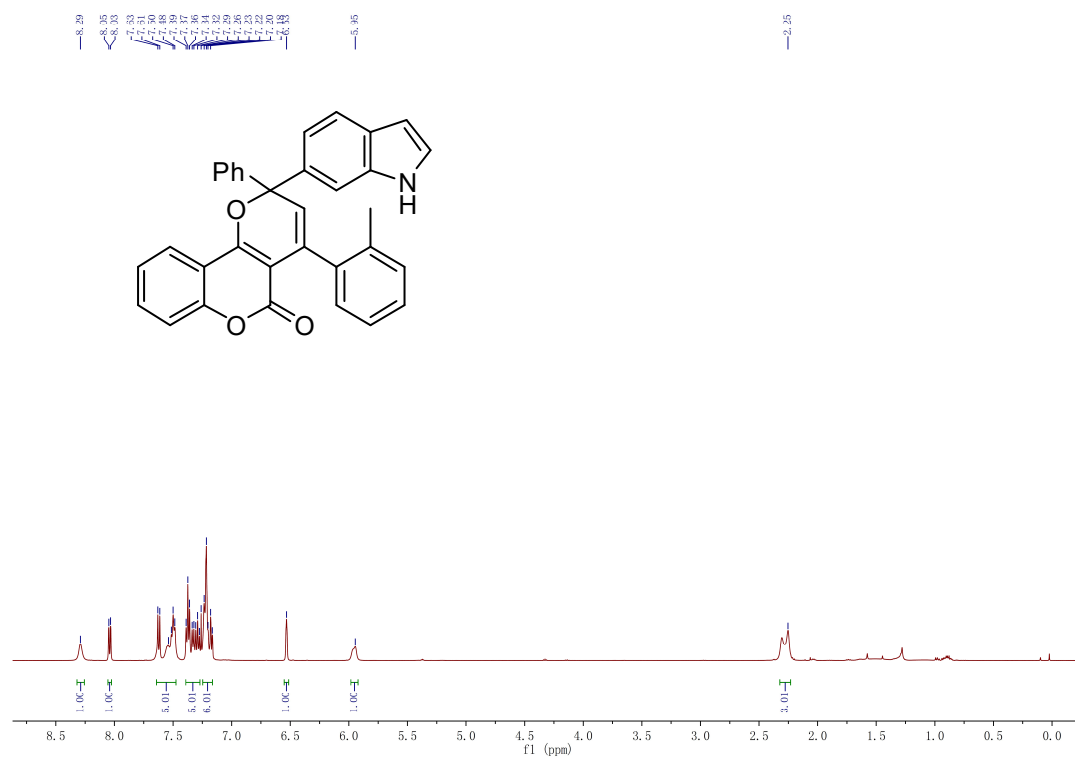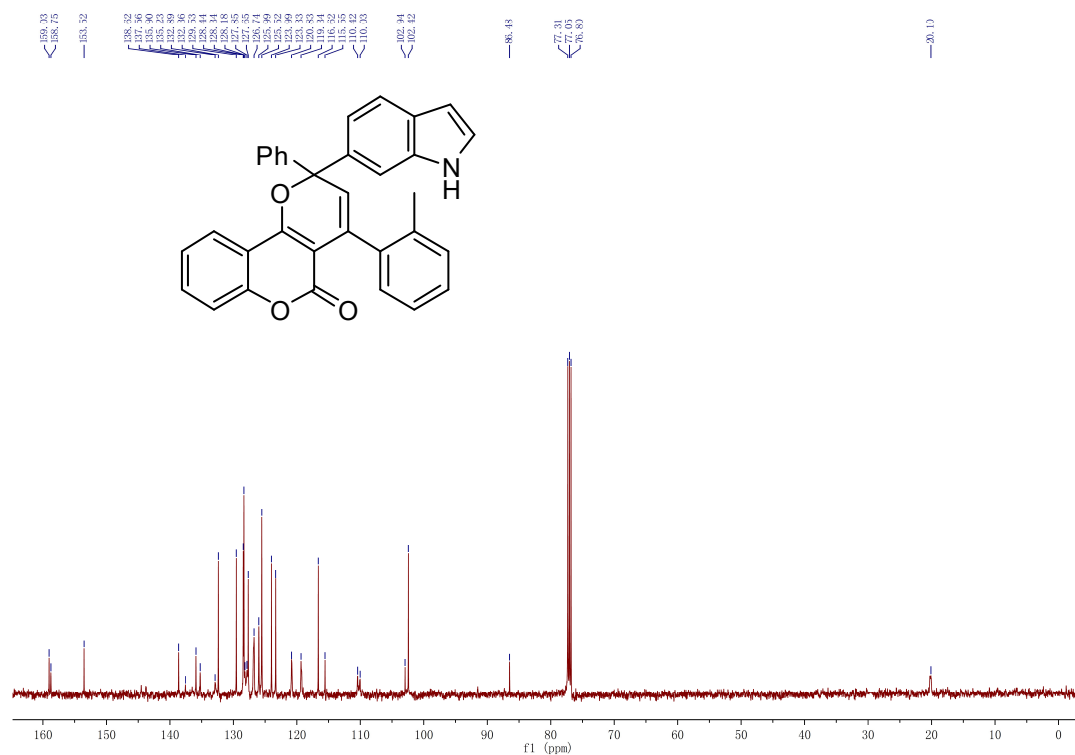

**2-(1*H*-indol-6-yl)-2-phenyl-4-(thiophen-3-yl)pyrano[3,2-*c*]chromen-5(2*H*)-one  
(3na)**

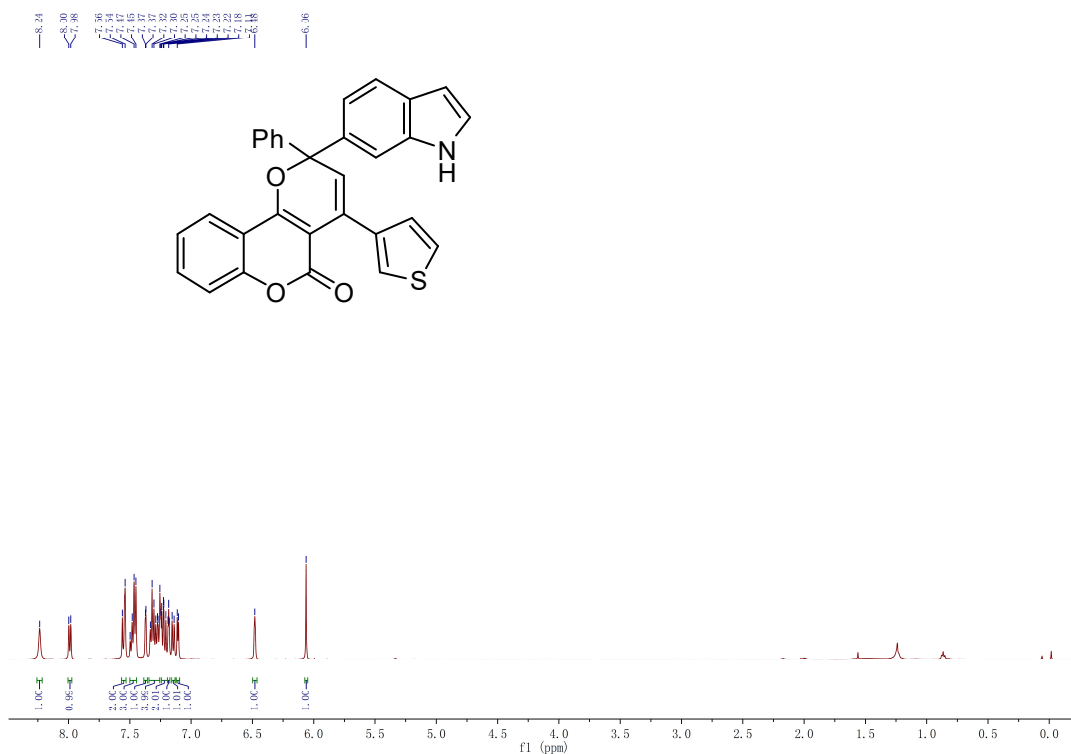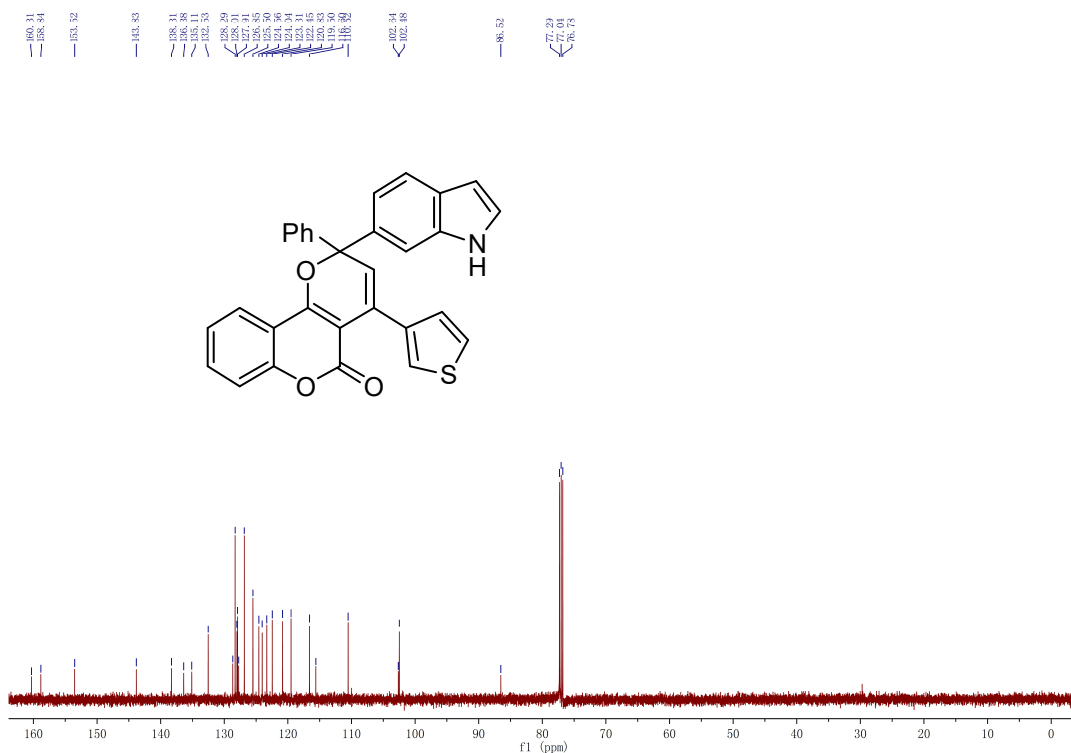

# 4-Cyclopropyl-2-(1*H*-indol-6-yl)-2-phenylpyrano[3,2-*c*]chromen-5(2*H*)-one (3oa)

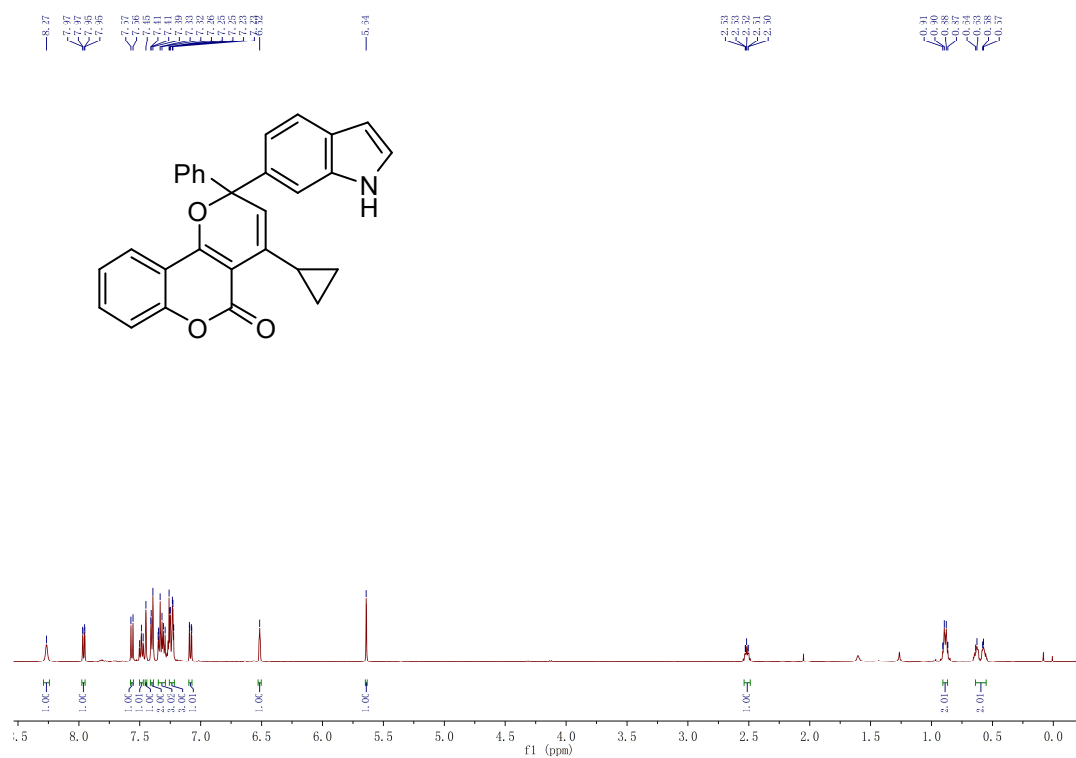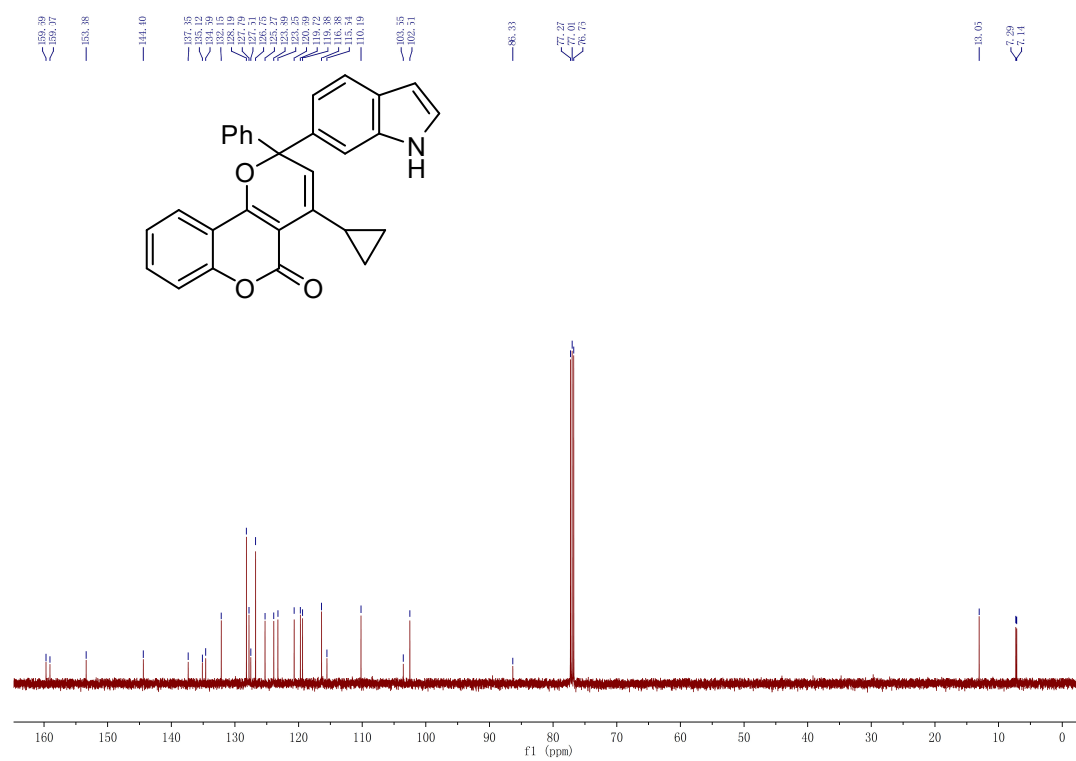



**2-(4-Chlorophenyl)-2-(1*H*-indol-6-yl)-4-phenylpyrano[3,2-*c*]chromen-5(2*H*)-one (3qa)**

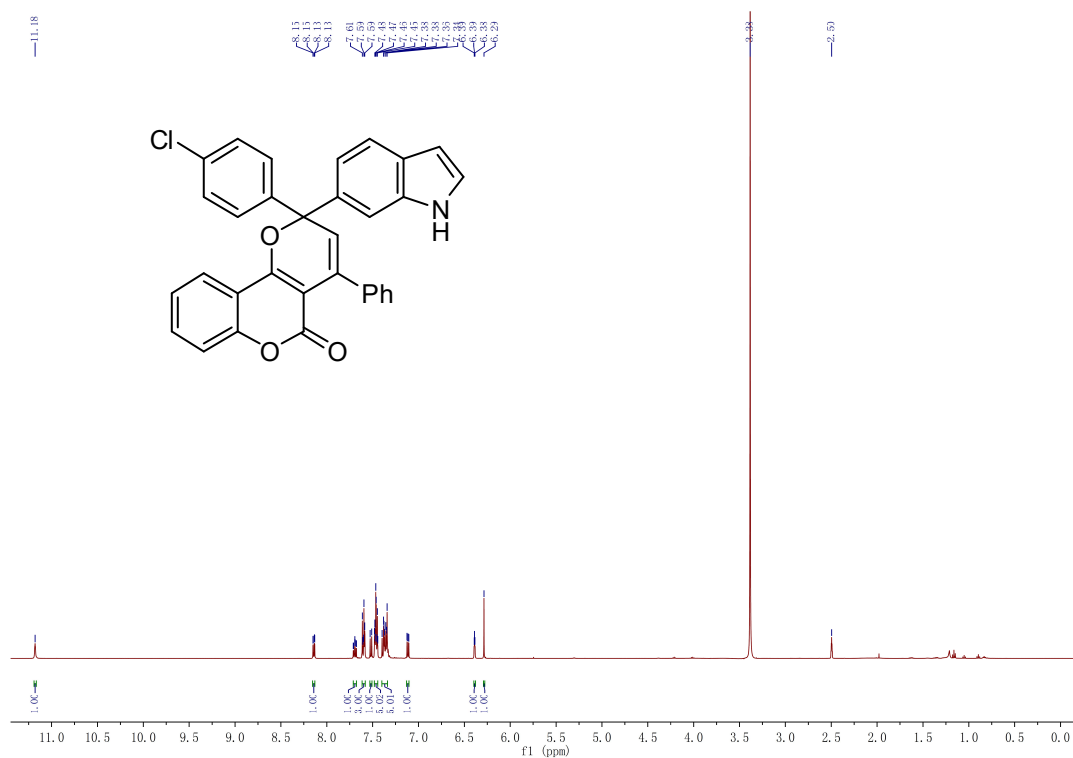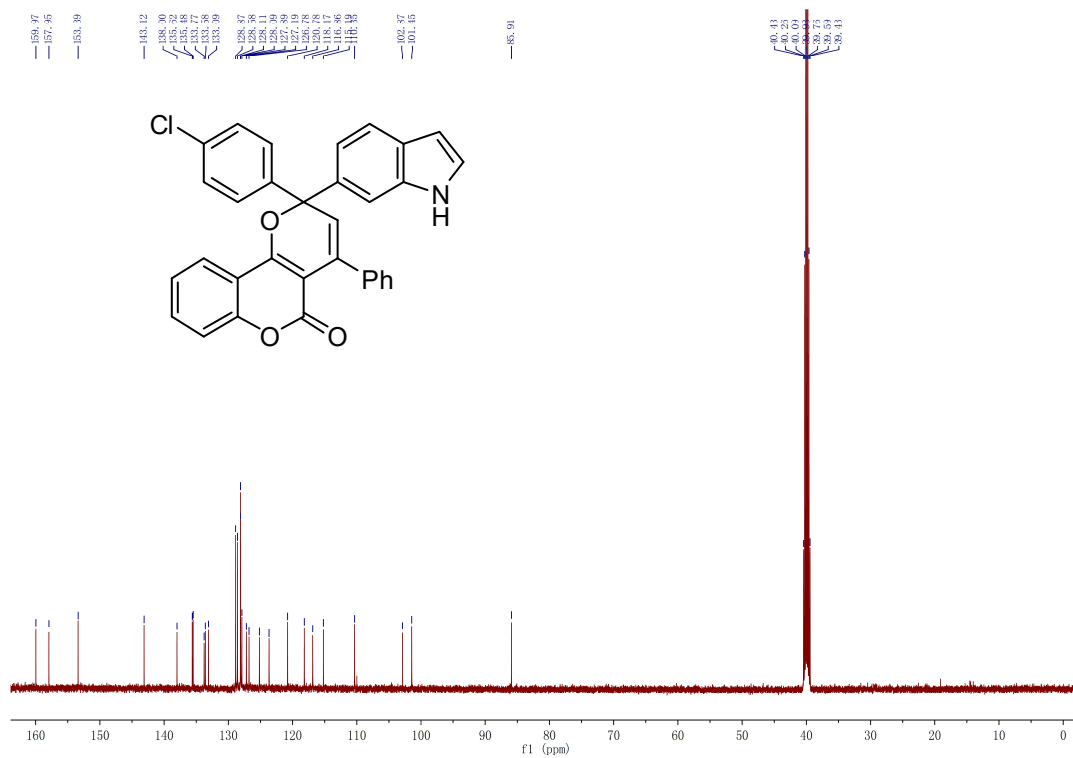

## 2-(1*H*-indol-6-yl)-4-phenyl-2-(*p*-tolyl)pyrano[3,2-*c*]chromen-5(2*H*)-one (3ra)

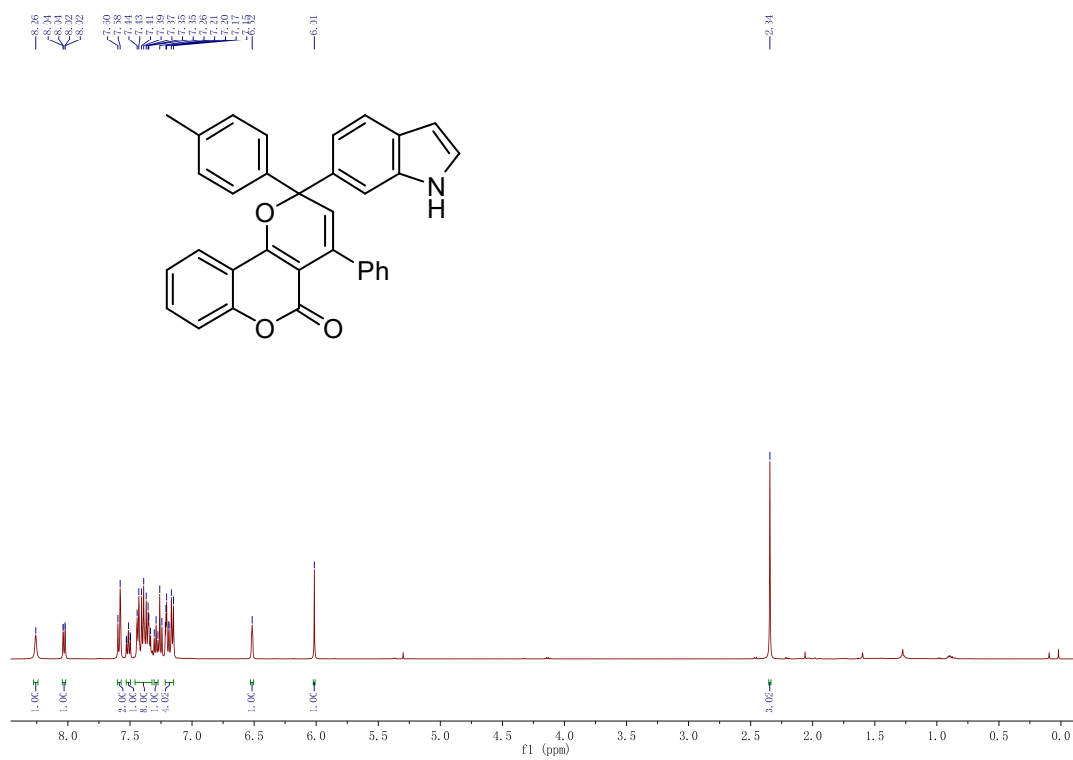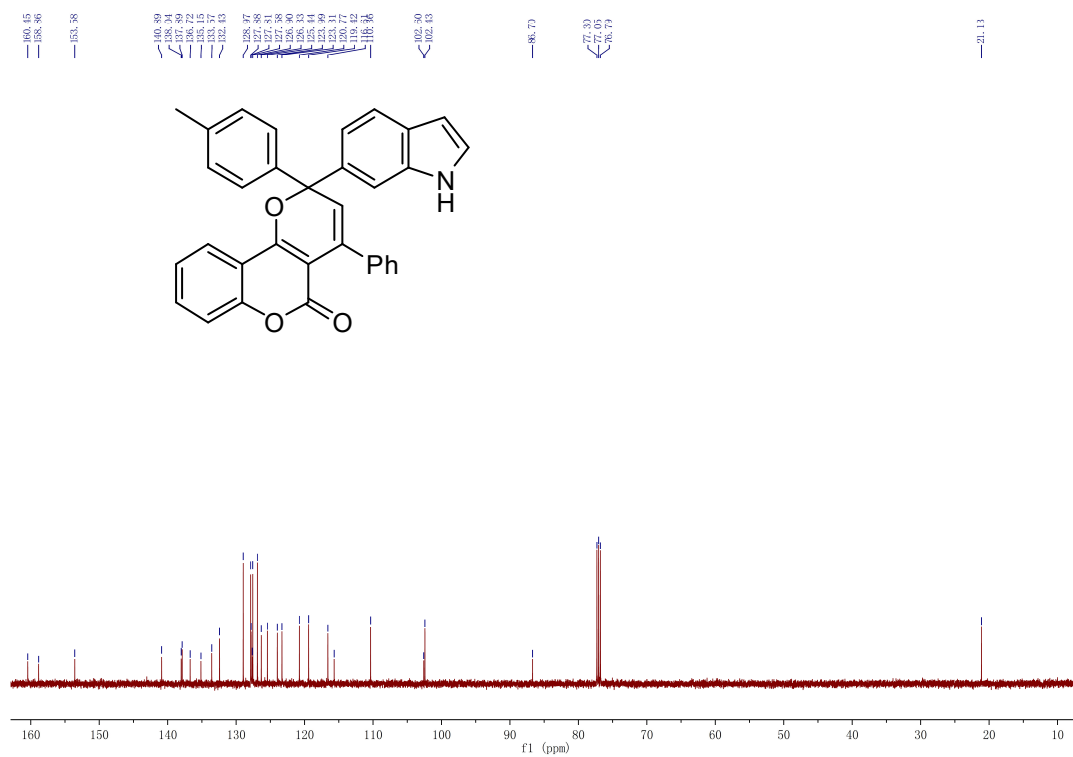

**2-(3-Chlorophenyl)-2-(1*H*-indol-6-yl)-4-phenylpyrano[3,2-*c*]chromen-5(2*H*)-one (3sa)**

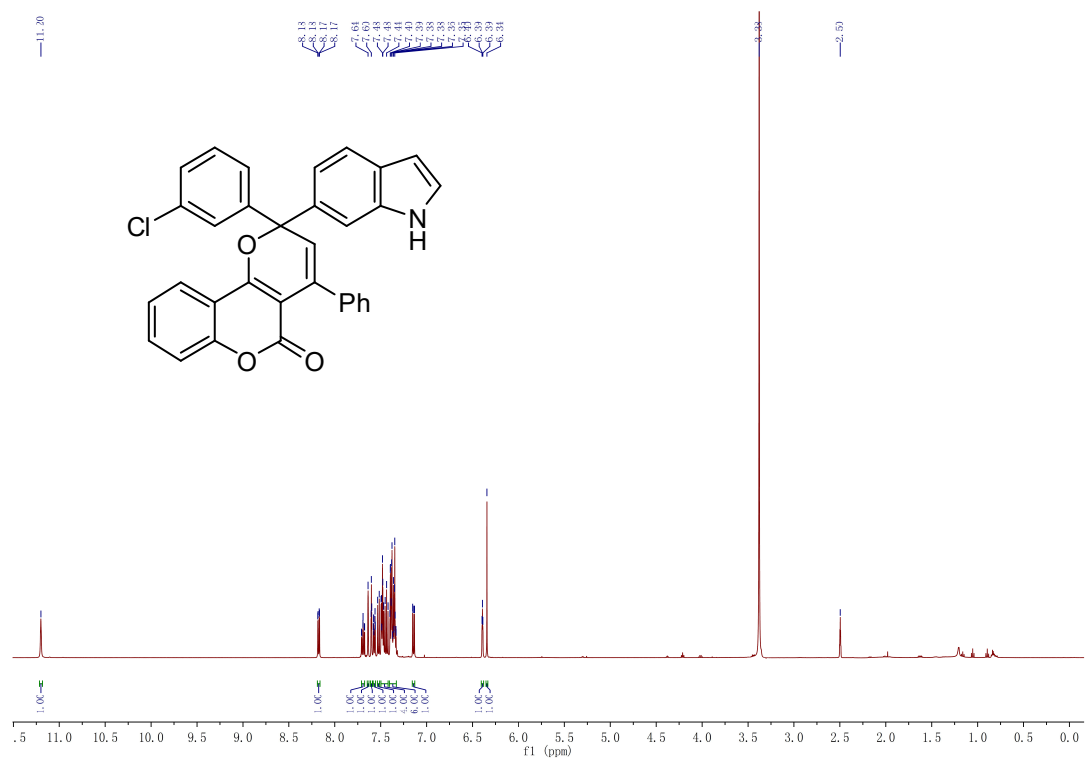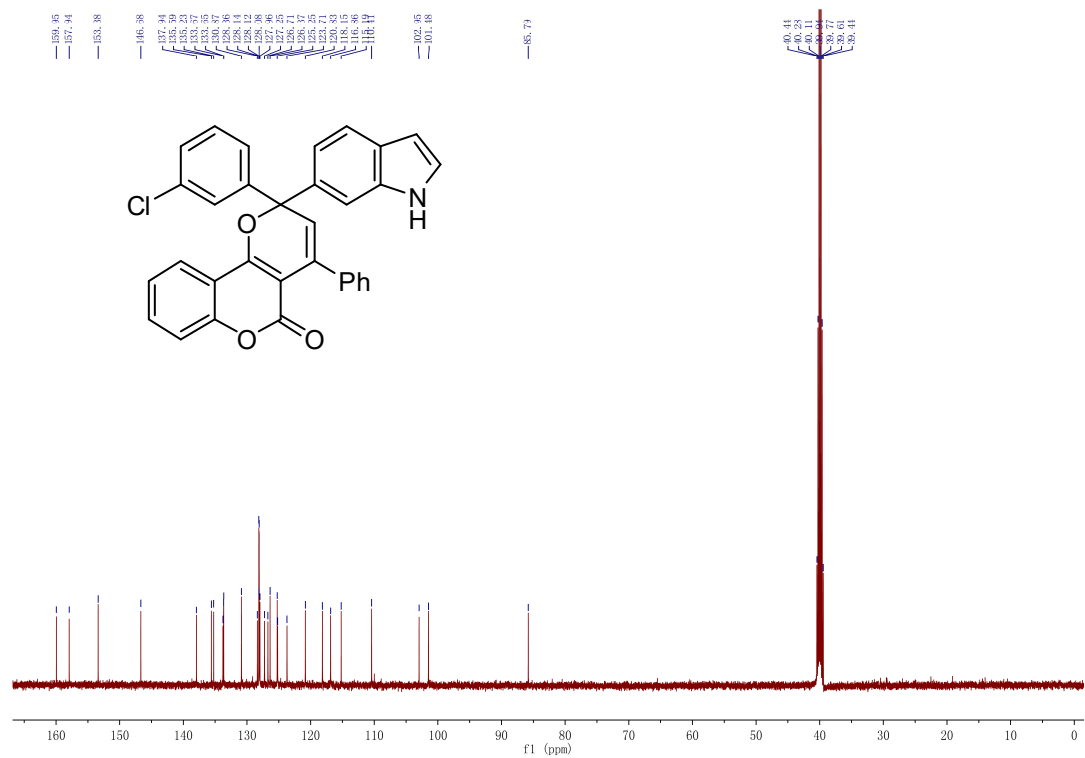

2-(1*H*-indol-6-yl)-4-phenyl-2-(*o*-tolyl)pyrano[3,2-*c*]chromen-5(2*H*)-one (3ta)

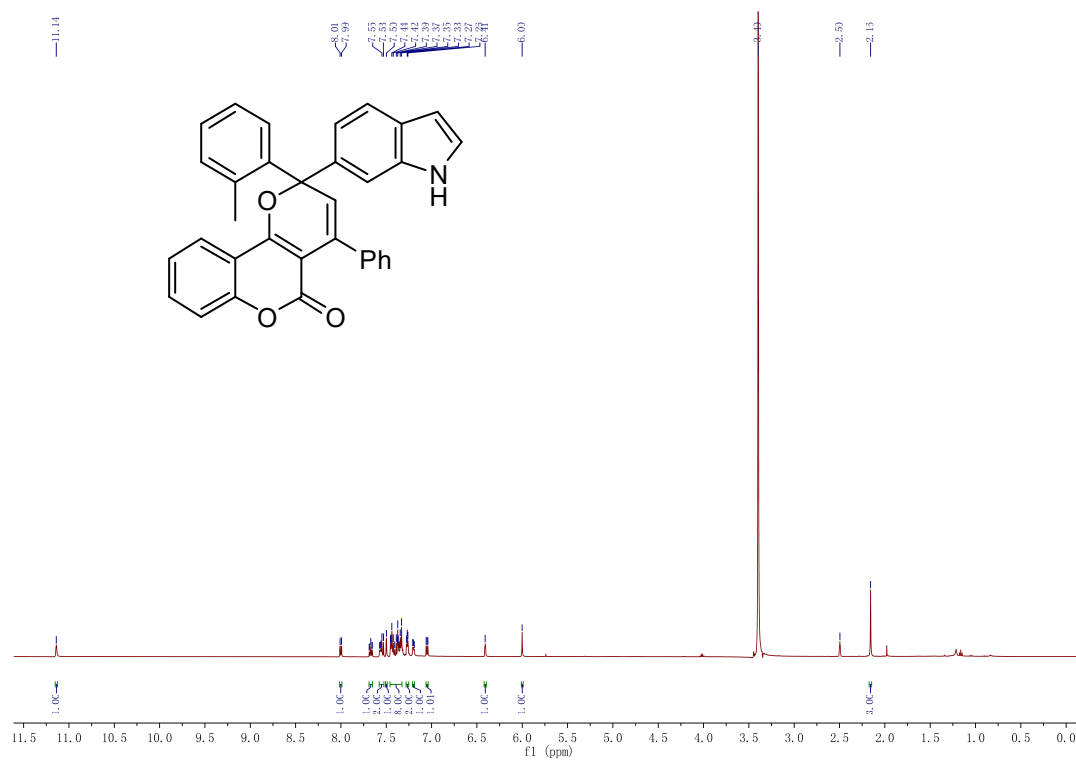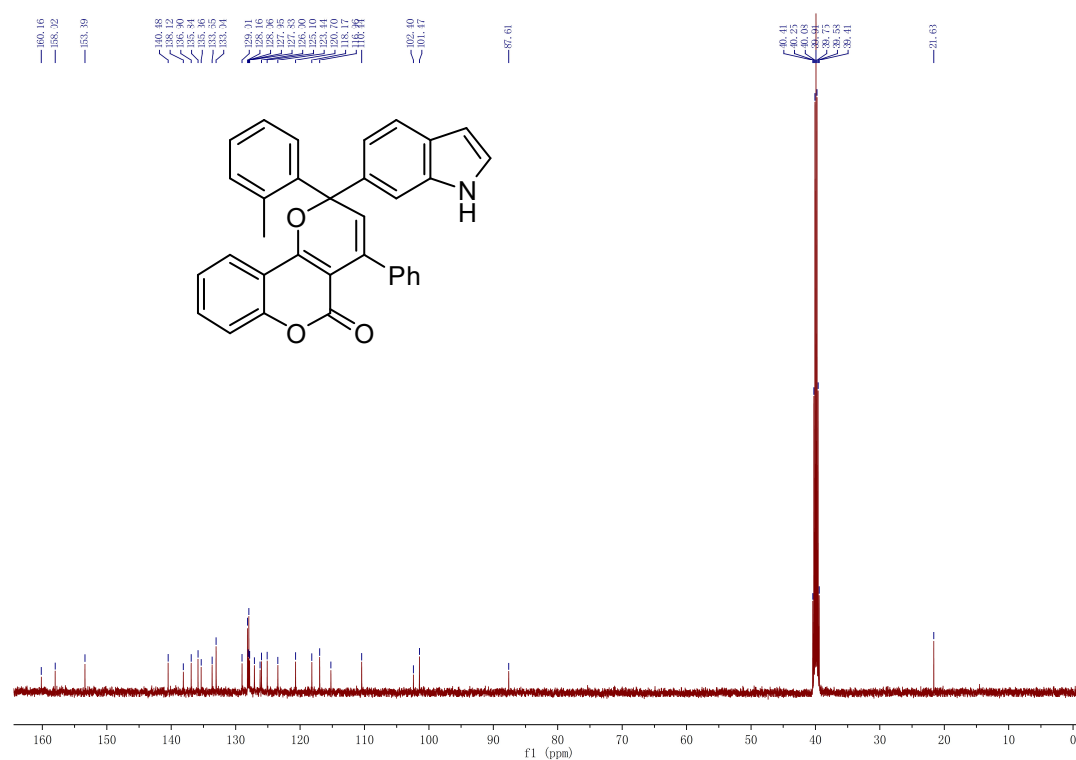



## 2-Ethyl-2-(1*H*-indol-6-yl)-4-phenylpyrano[3,2-*c*]chromen-5(2*H*)-one (3ua)

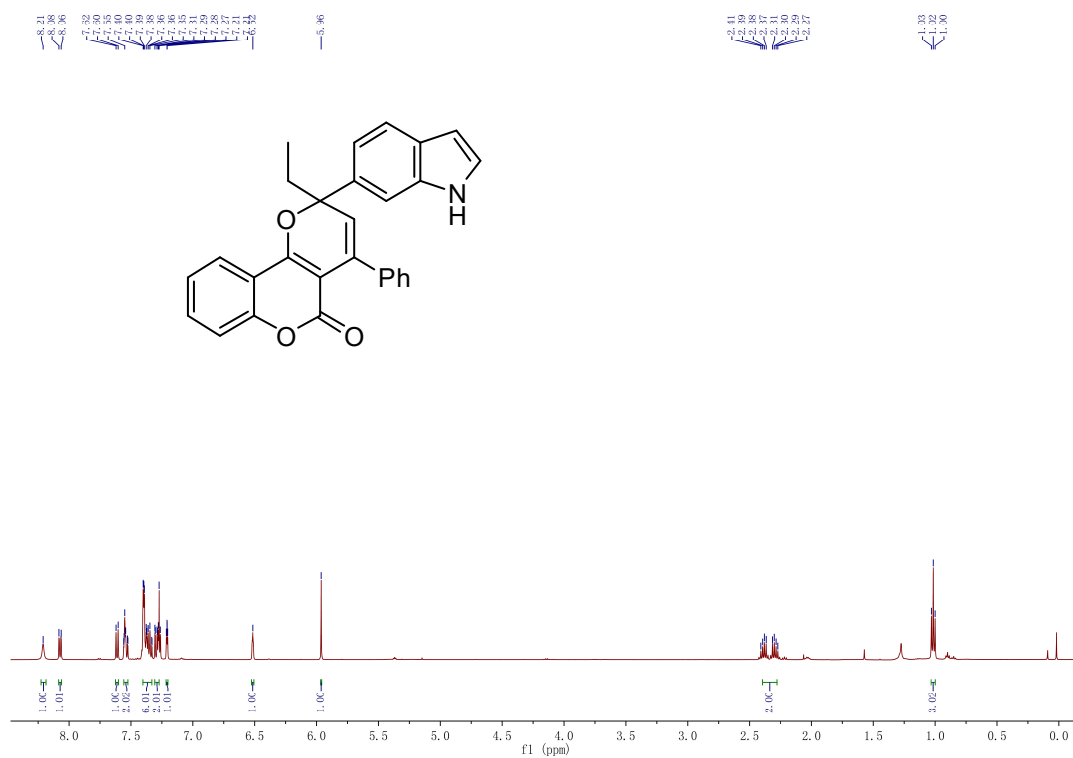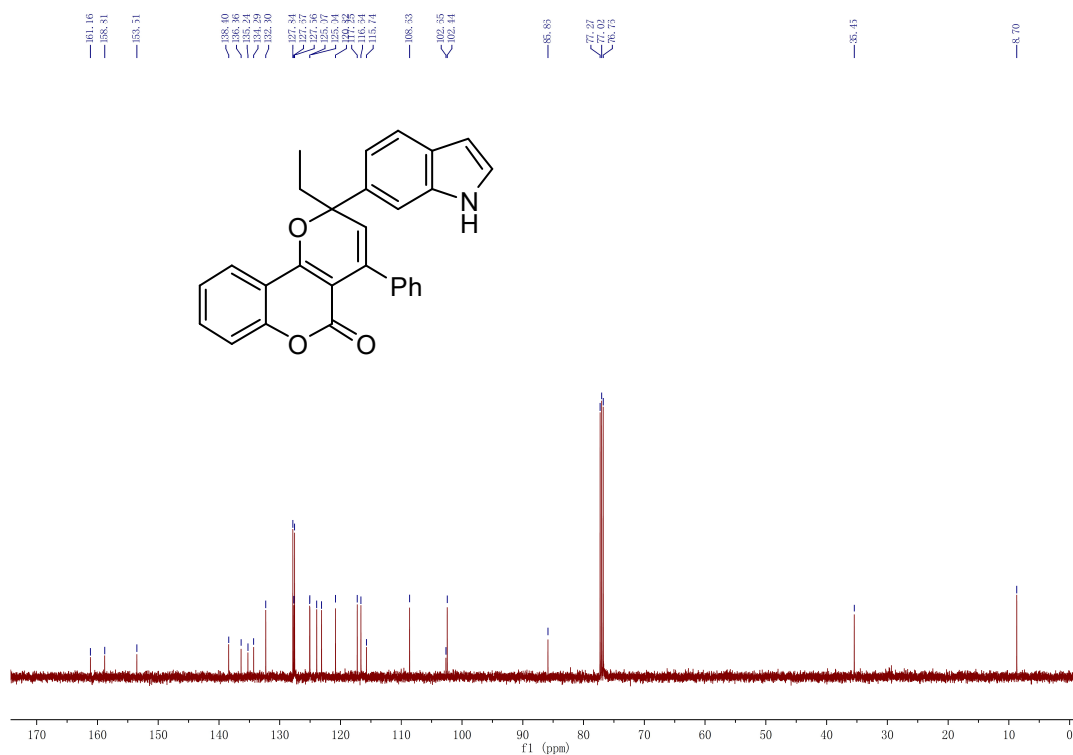

# 9-Chloro-2-(1*H*-indol-6-yl)-2,4-diphenylpyrano[3,2-*c*]chromen-5(2*H*)-one (3ab)

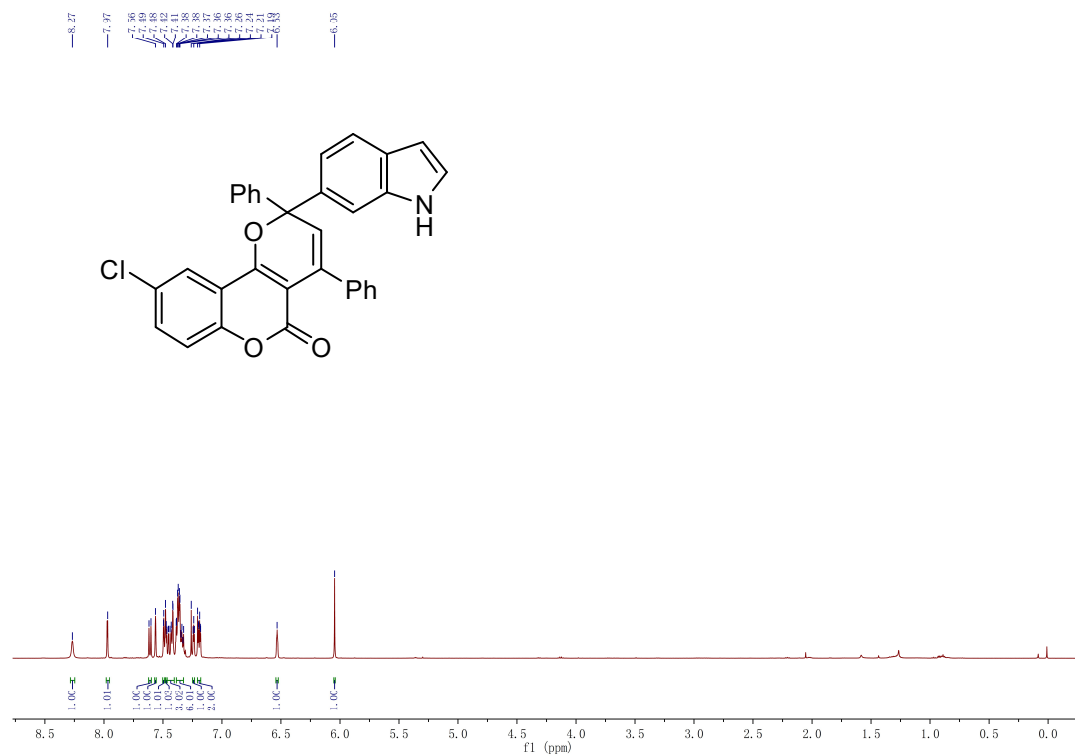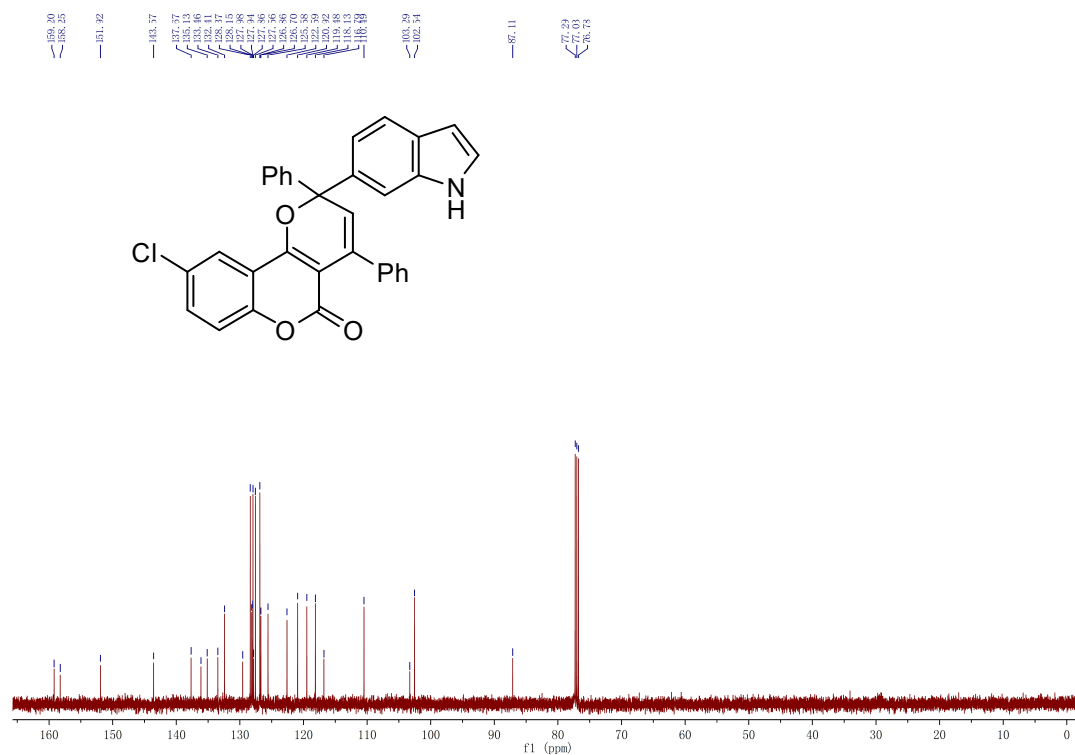

## 2-(1*H*-indol-6-yl)-9-methyl-2,4-diphenylpyrano[3,2-*c*]chromen-5(2*H*)-one (3ac)

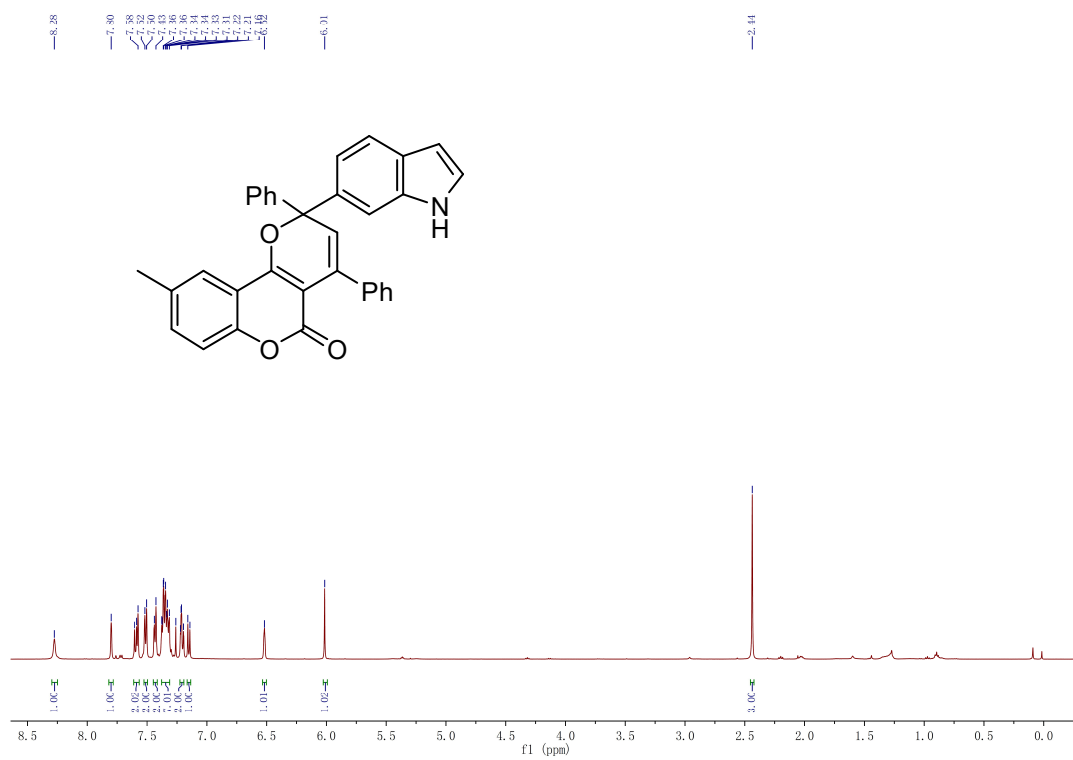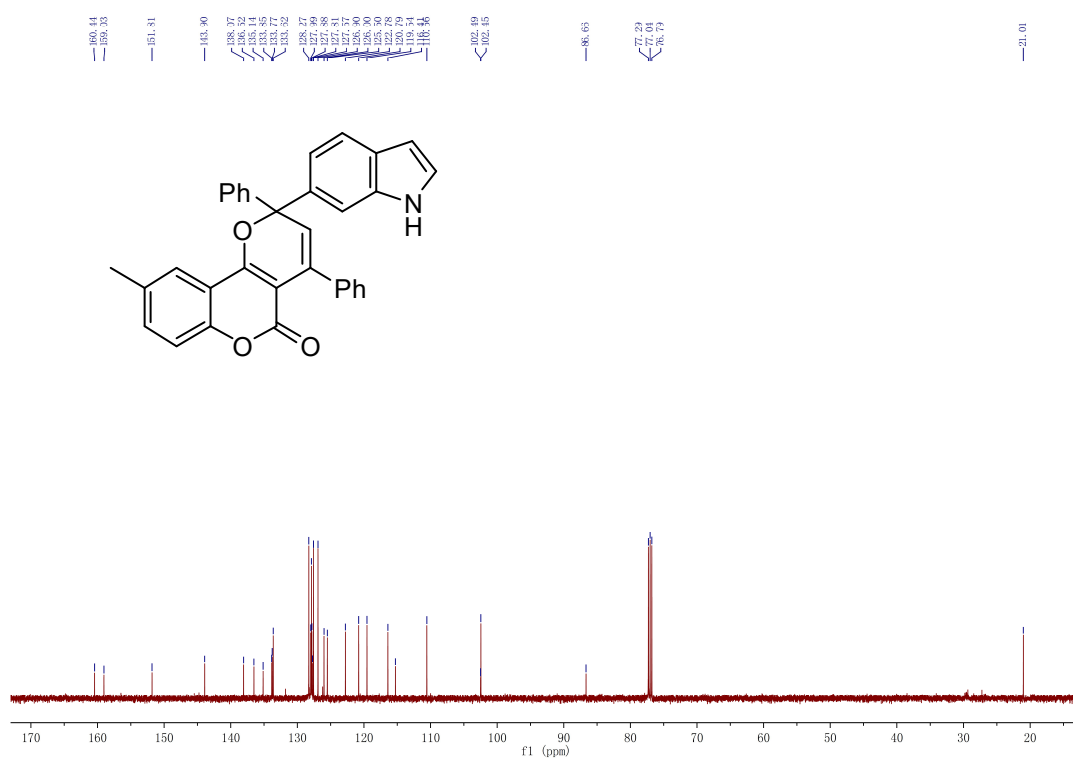

# 8-Chloro-2-(1*H*-indol-6-yl)-2,4-diphenylpyrano[3,2-*c*]chromen-5(2*H*)-one (3ad)

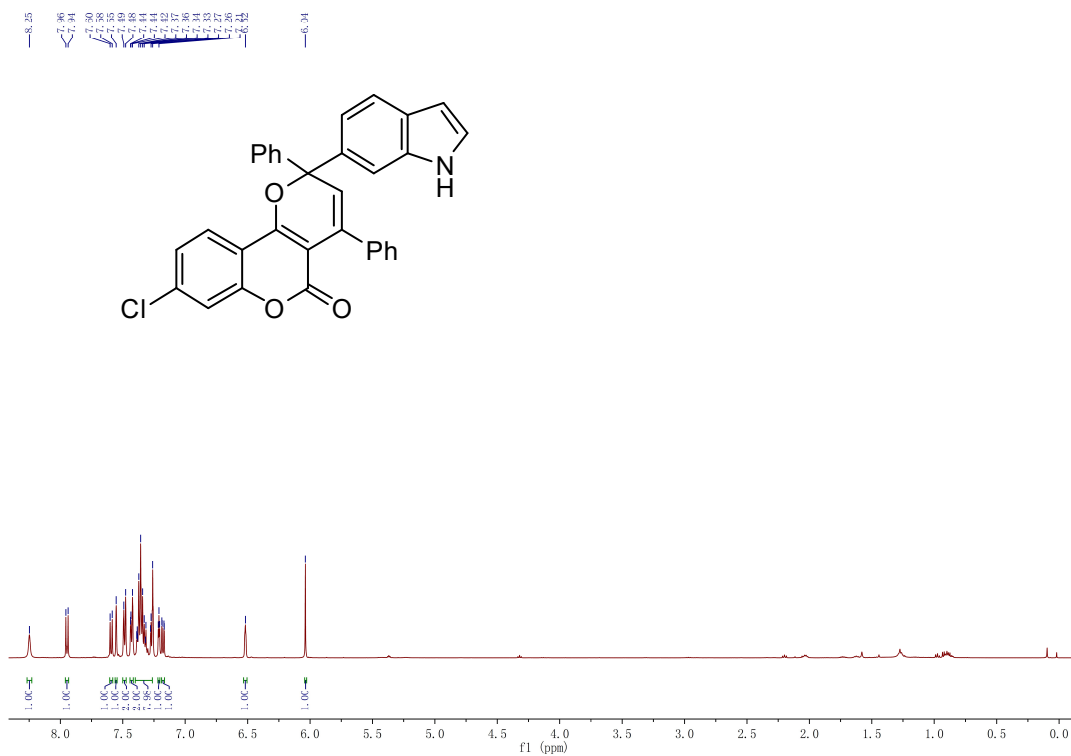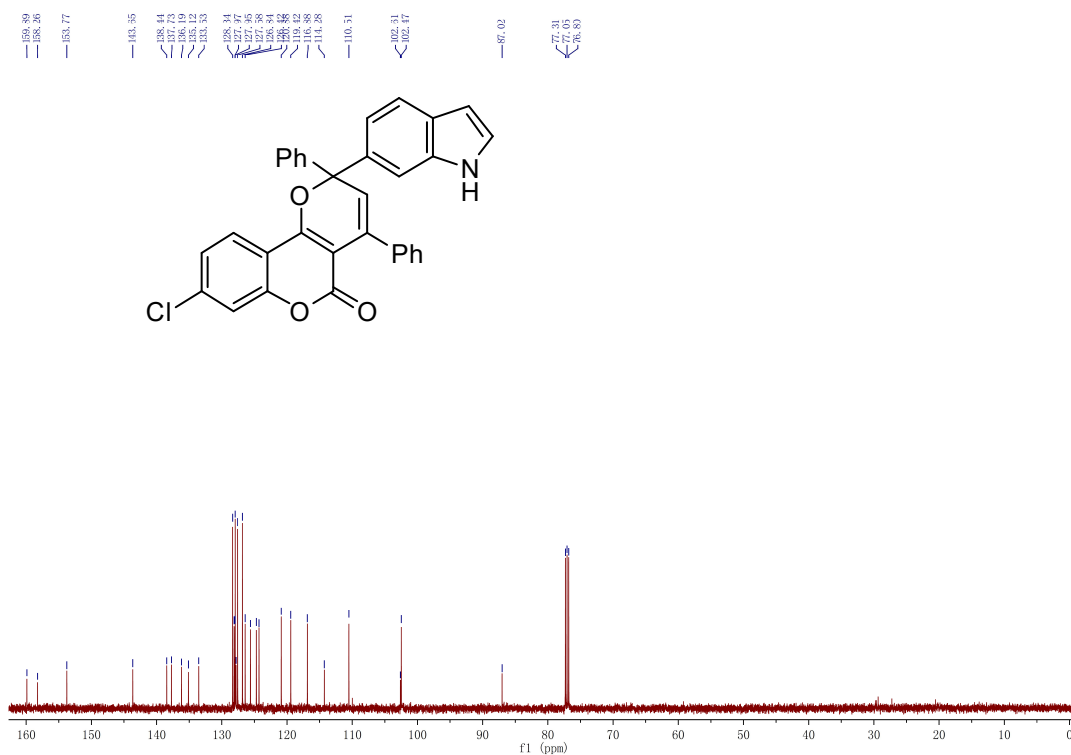

# 2-(1*H*-indol-6-yl)-8-methyl-2,4-diphenylpyrano[3,2-*c*]chromen-5(2*H*)-one (3ae)

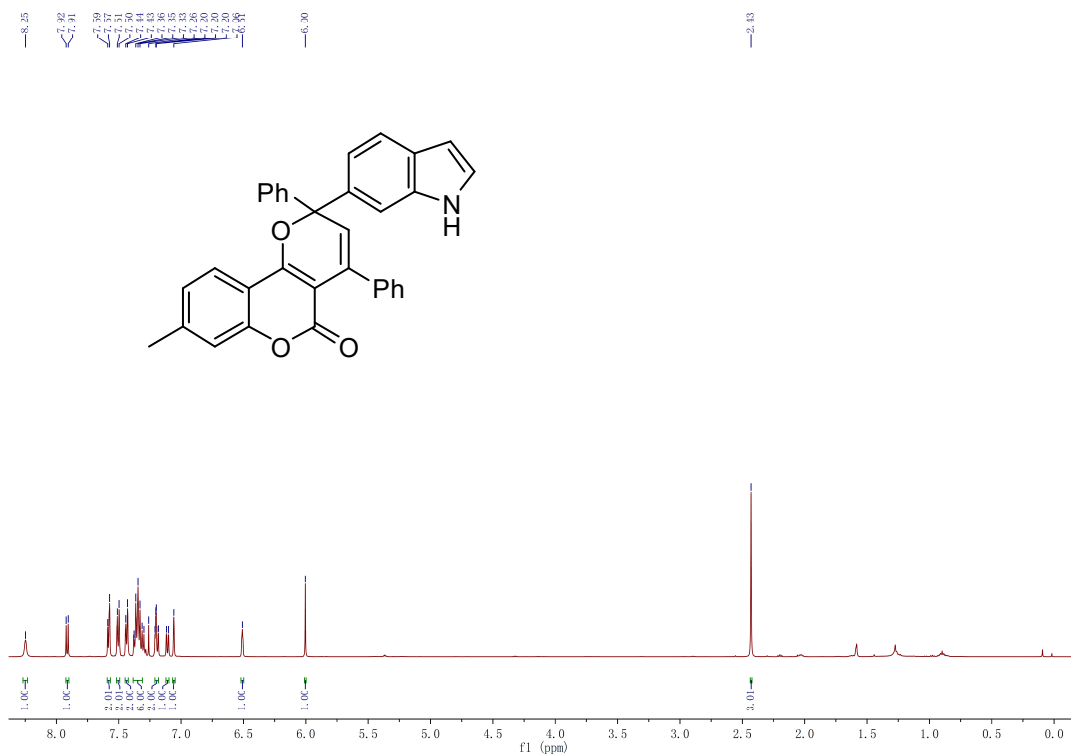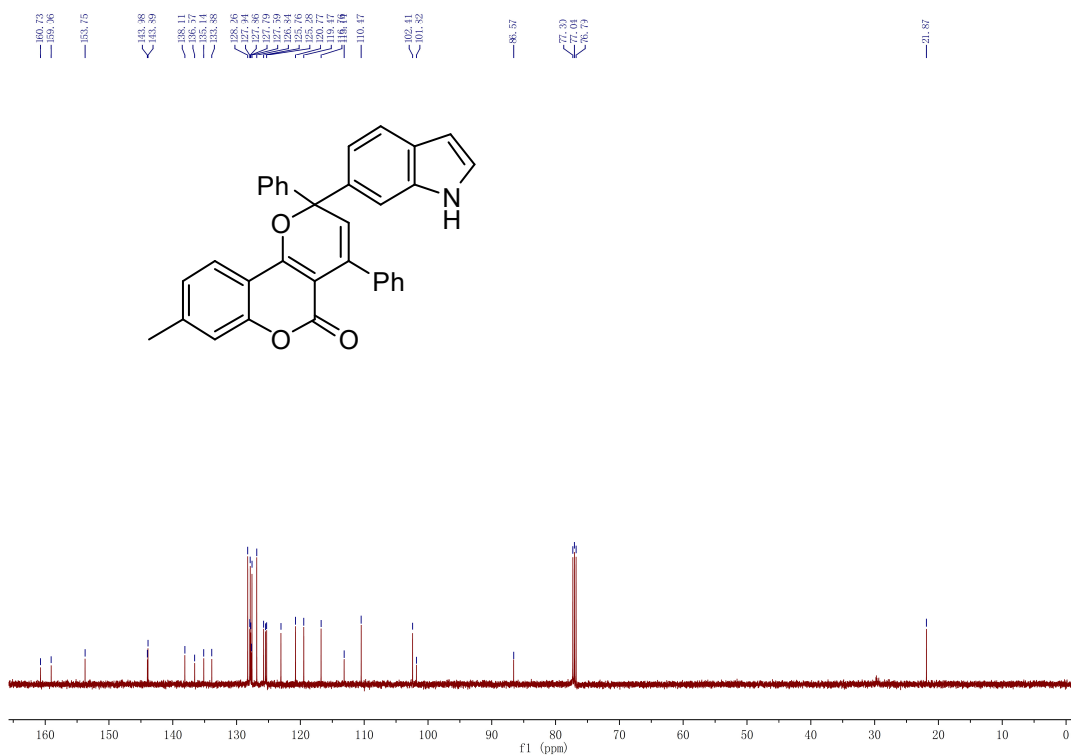

# 2-(1*H*-indol-6-yl)-2,4-diphenyl-7,8-dihydro-2*H*-chromen-5(6*H*)-one (5aa)

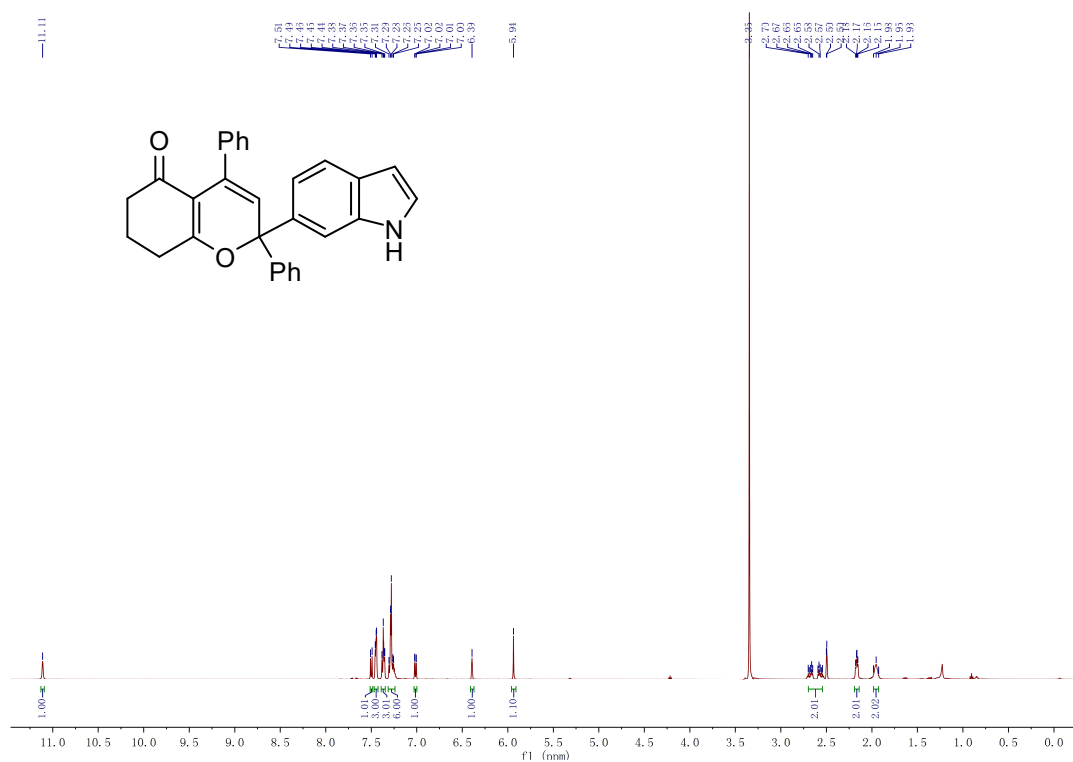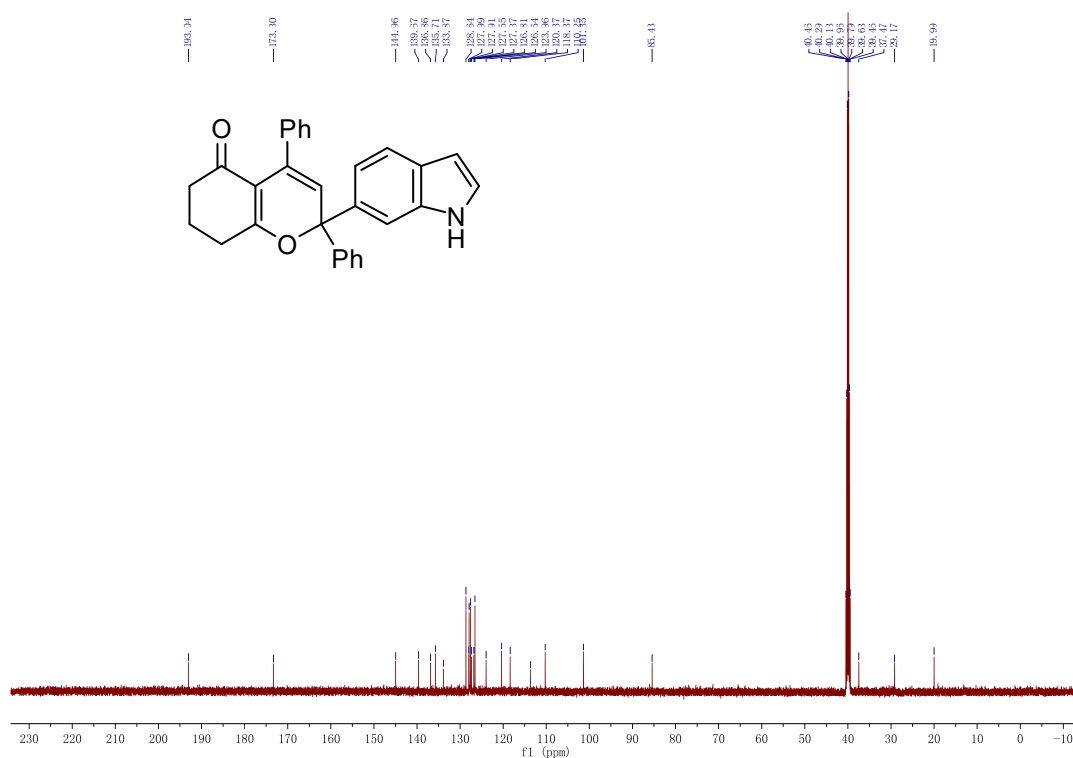

# 4-(4-Chlorophenyl)-2-(1*H*-indol-6-yl)-2-phenyl-7,8-dihydro-2*H*-chromen-5(6*H*)-one (5ca)

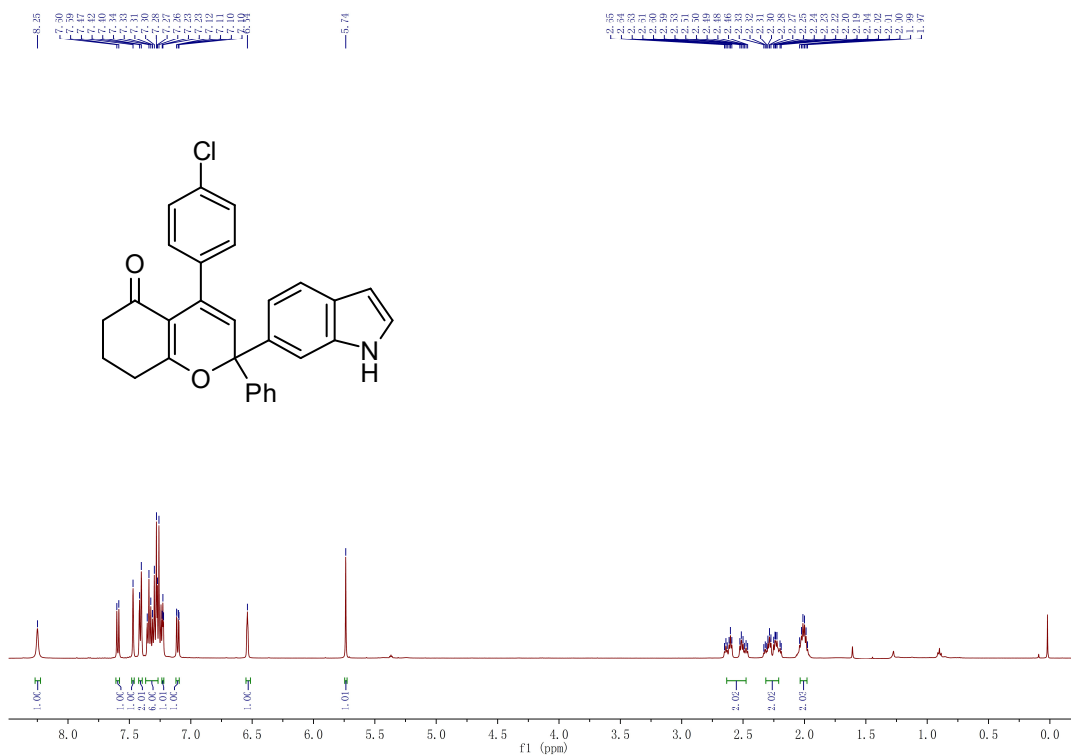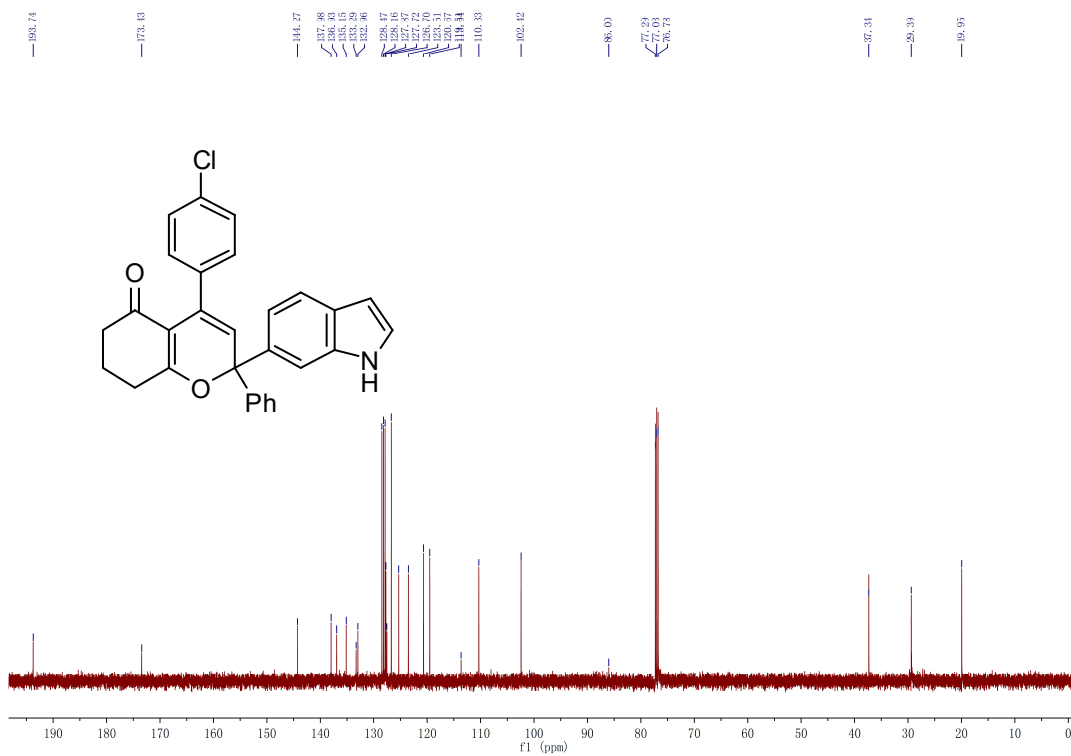

2-(1*H*-indol-6-yl)-2-phenyl-4-(*p*-tolyl)-7,8-dihydro-2*H*-chromen-5(6*H*)-one (5ea)

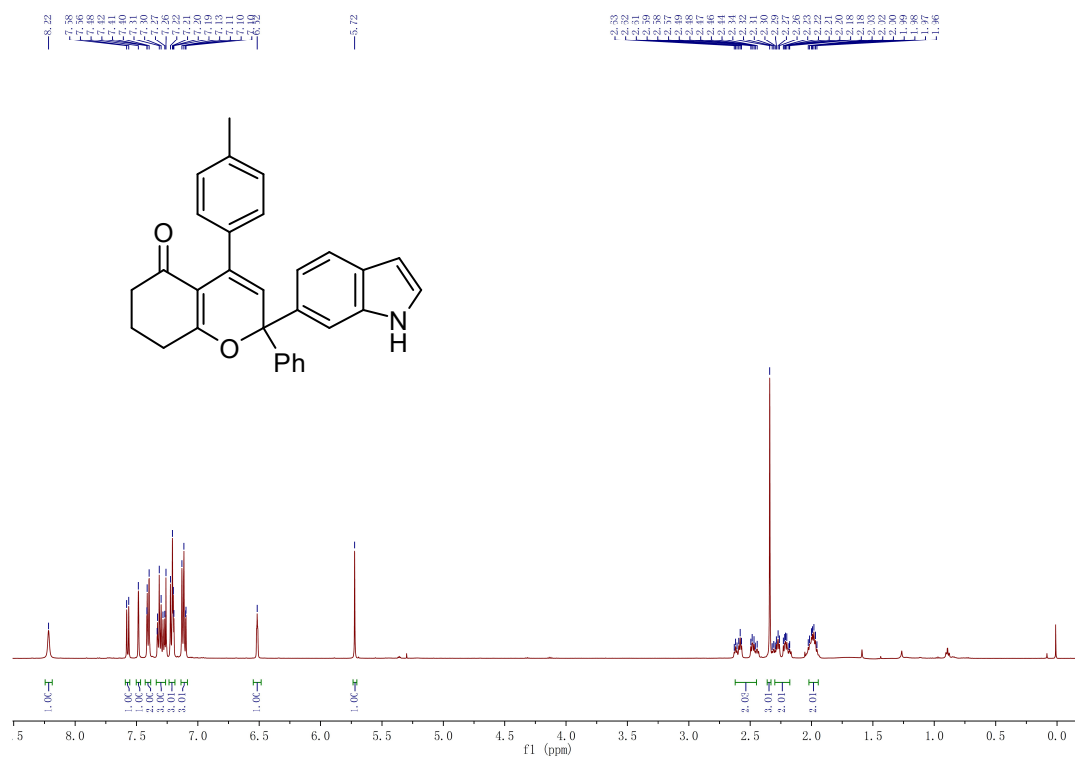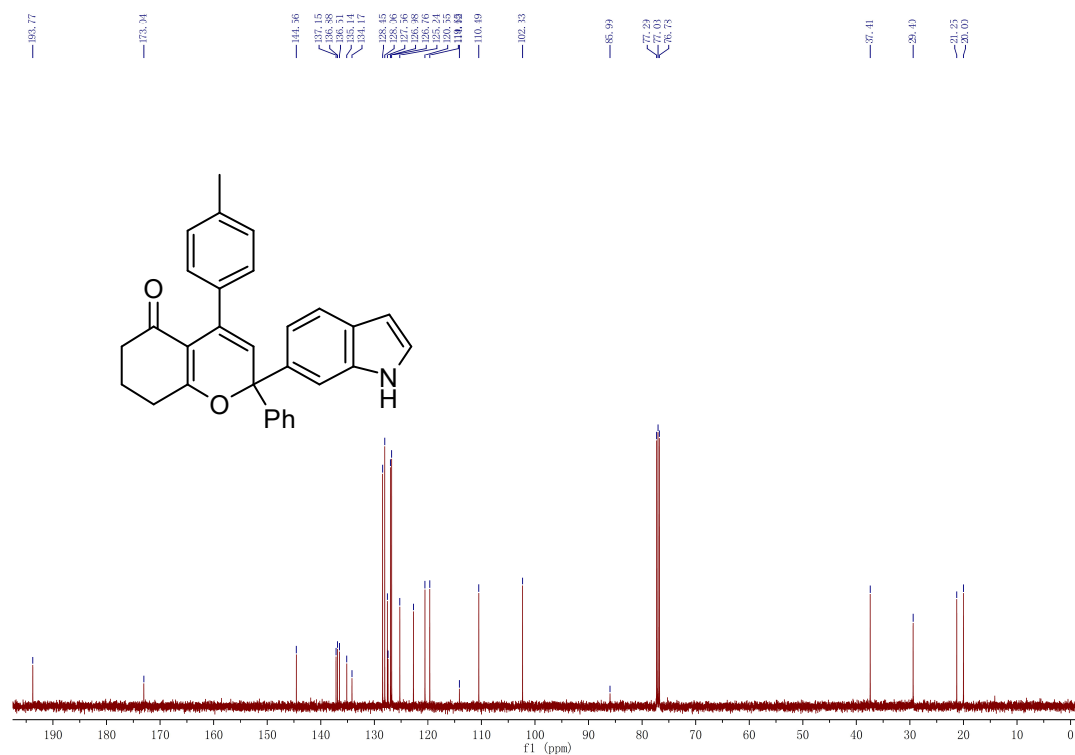



# 4-(3-Chlorophenyl)-2-(1*H*-indol-6-yl)-2-phenyl-7,8-dihydro-2*H*-chromen-5(6*H*)-one (Sha)

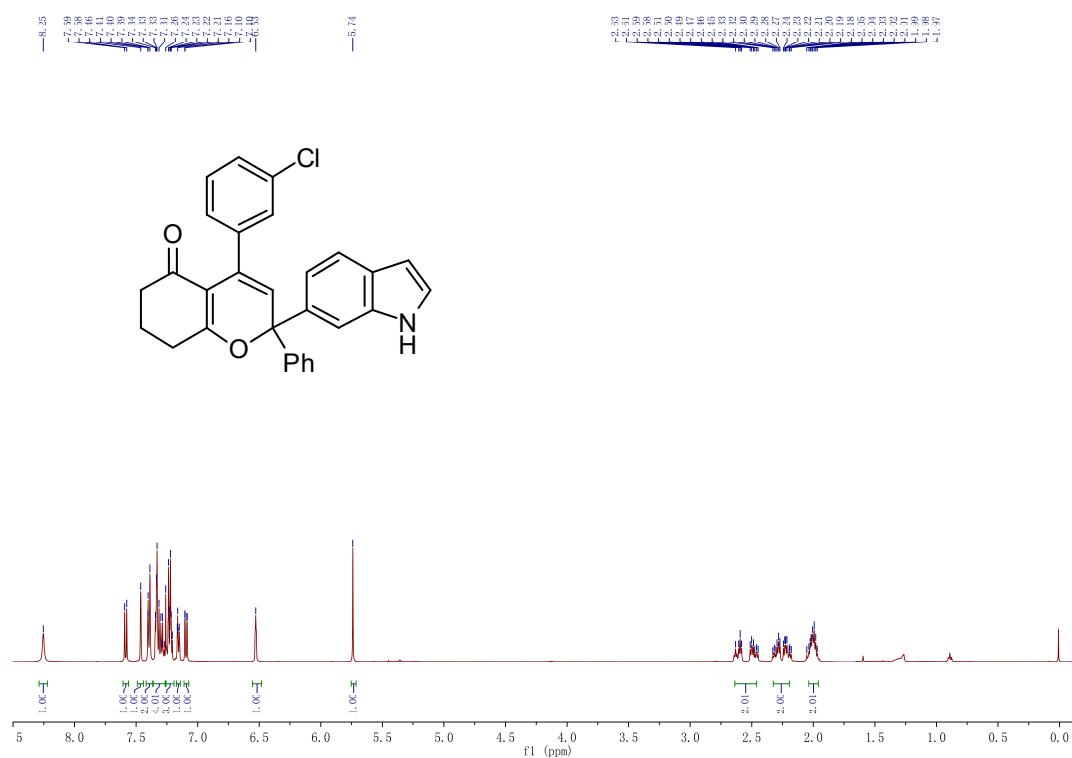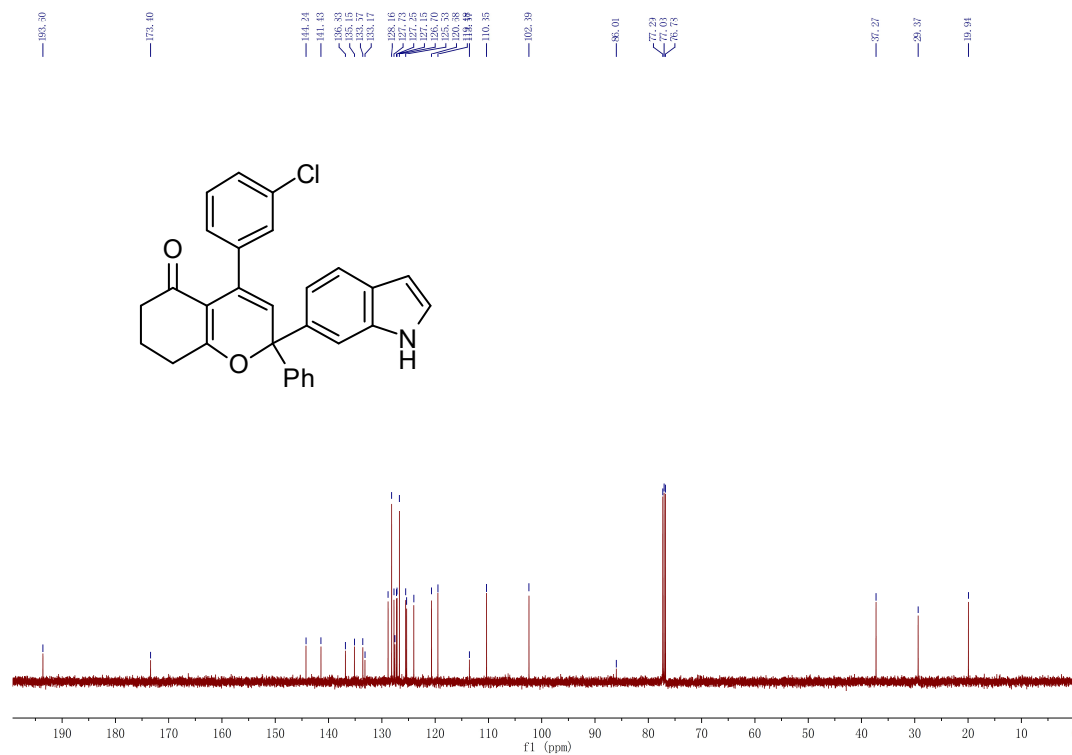



**2-(1*H*-indol-6-yl)-2-phenyl-4-(*o*-tolyl)-7,8-dihydro-2*H*-chromen-5(6*H*)-one (5ma)**

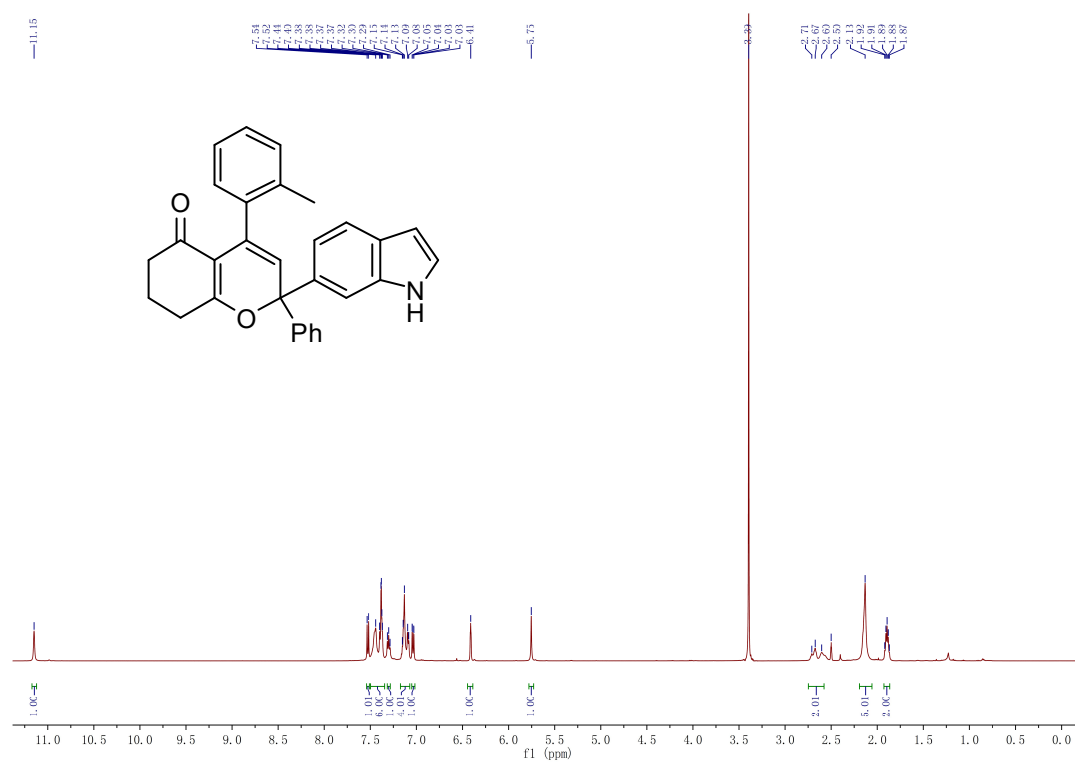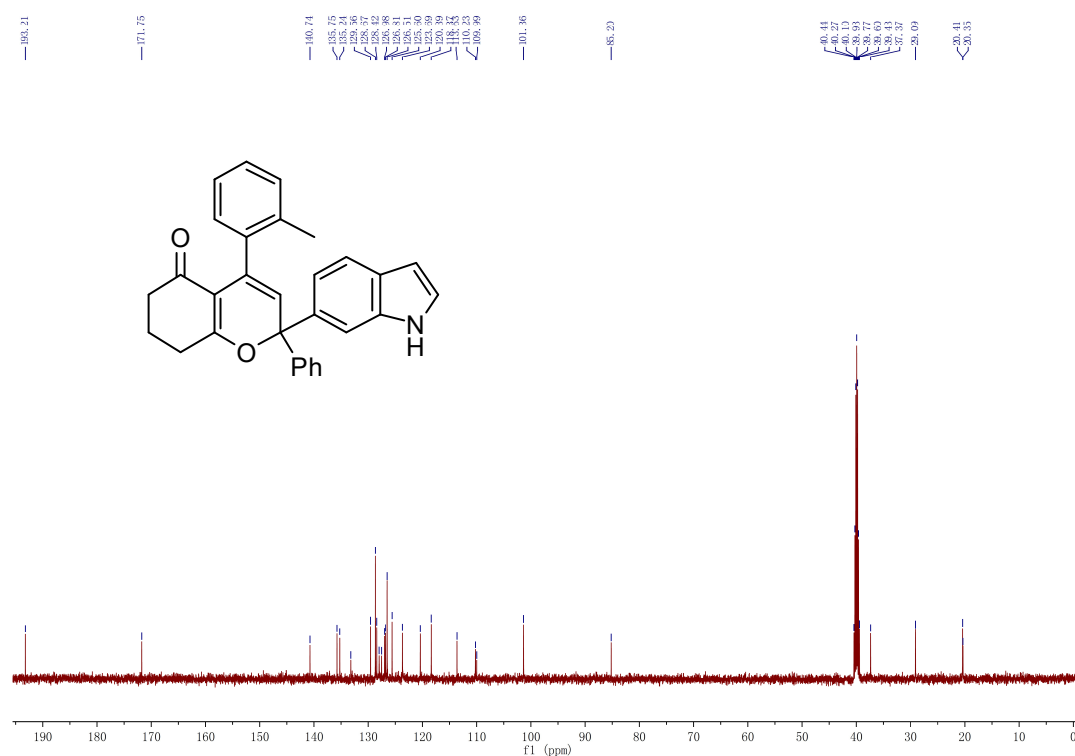

**2-(1*H*-indol-6-yl)-2-phenyl-4-(thiophen-3-yl)-7,8-dihydro-2*H*-chromen-5(6*H*)-one  
(5na)**

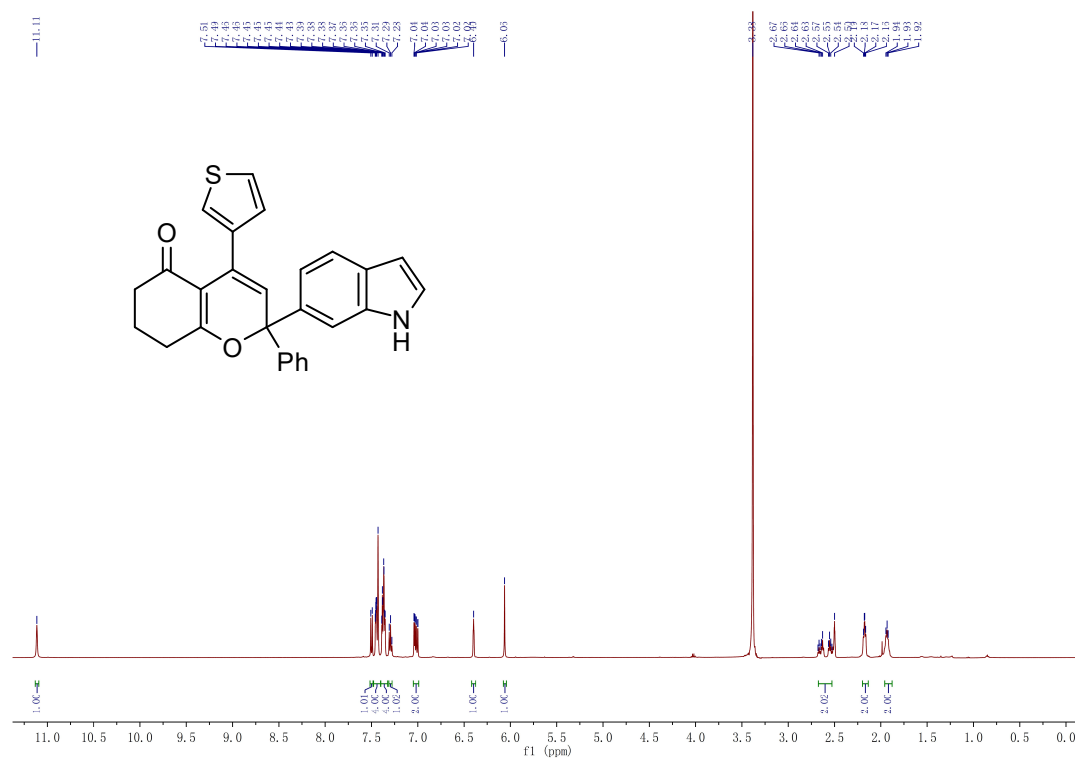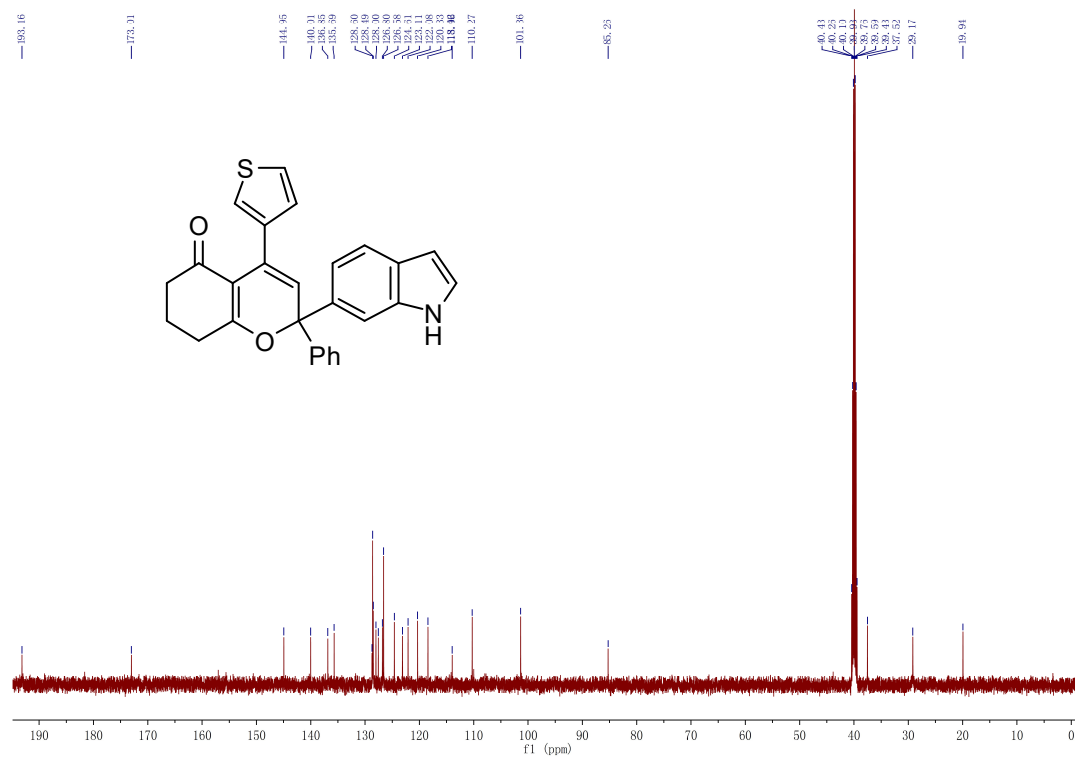

**2-(4-Fluorophenyl)-2-(1*H*-indol-6-yl)-4-phenyl-7,8-dihydro-2*H*-chromen-5(6*H*)-one (5va)**

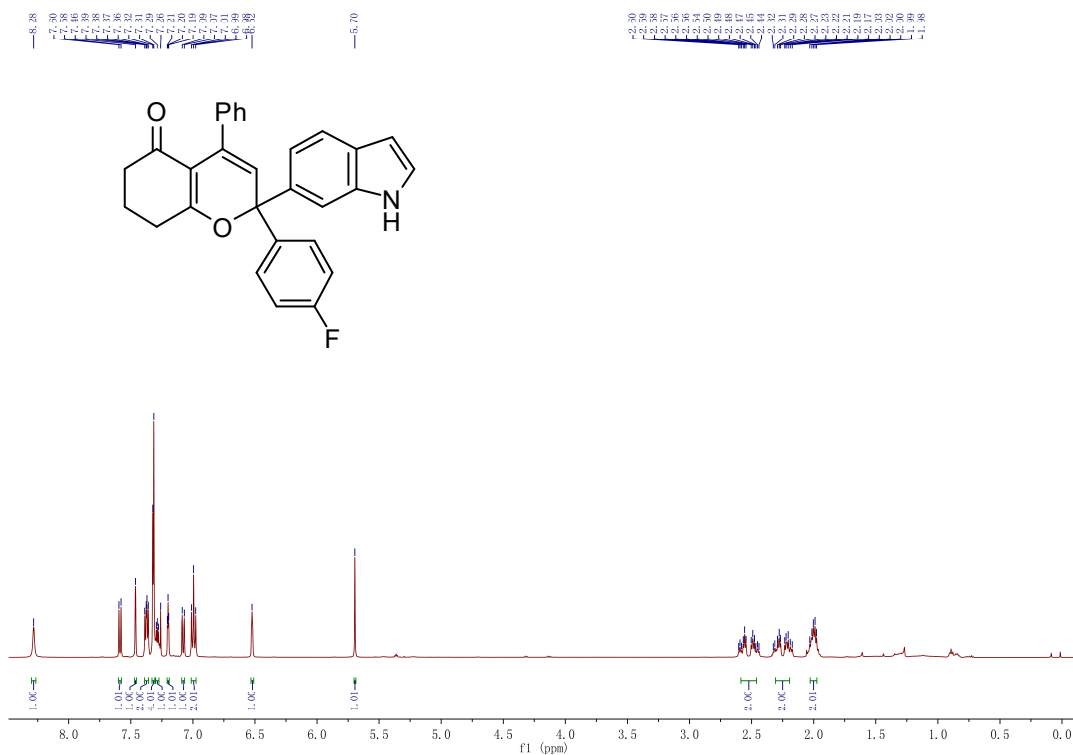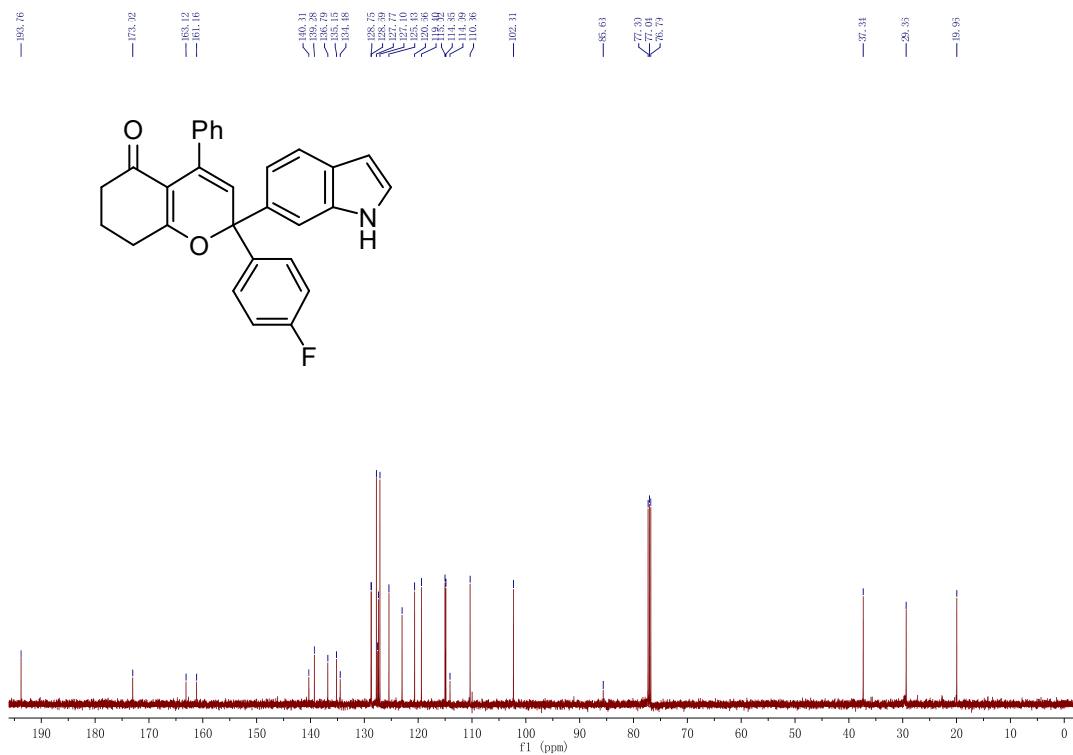

**2-(1*H*-indol-6-yl)-2-(4-methoxyphenyl)-4-phenyl-7,8-dihydro-2*H*-chromen-5(6*H*)-one (5wa)**

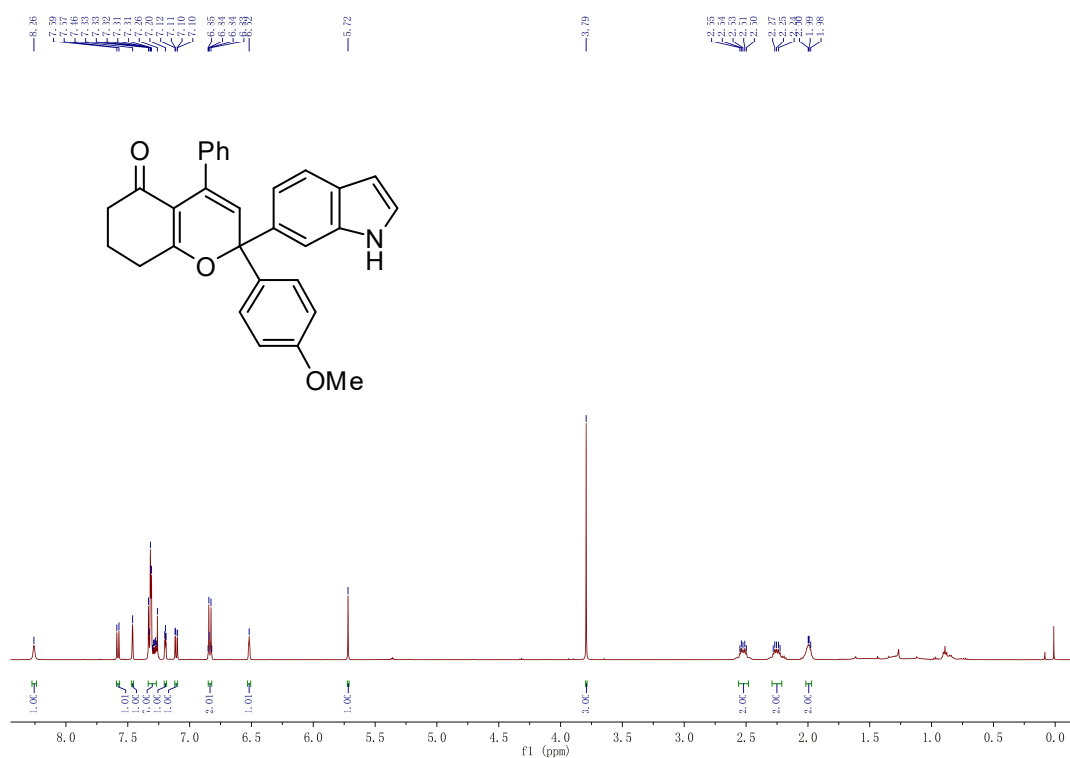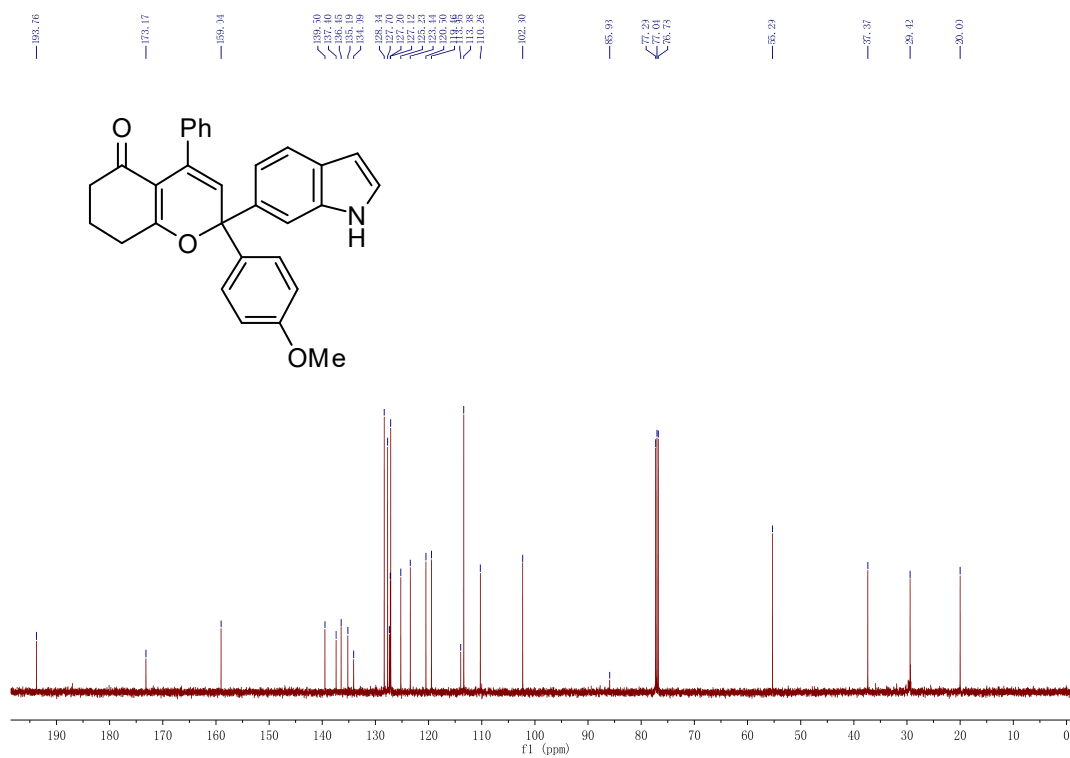



# I: X-Ray Analysis Data

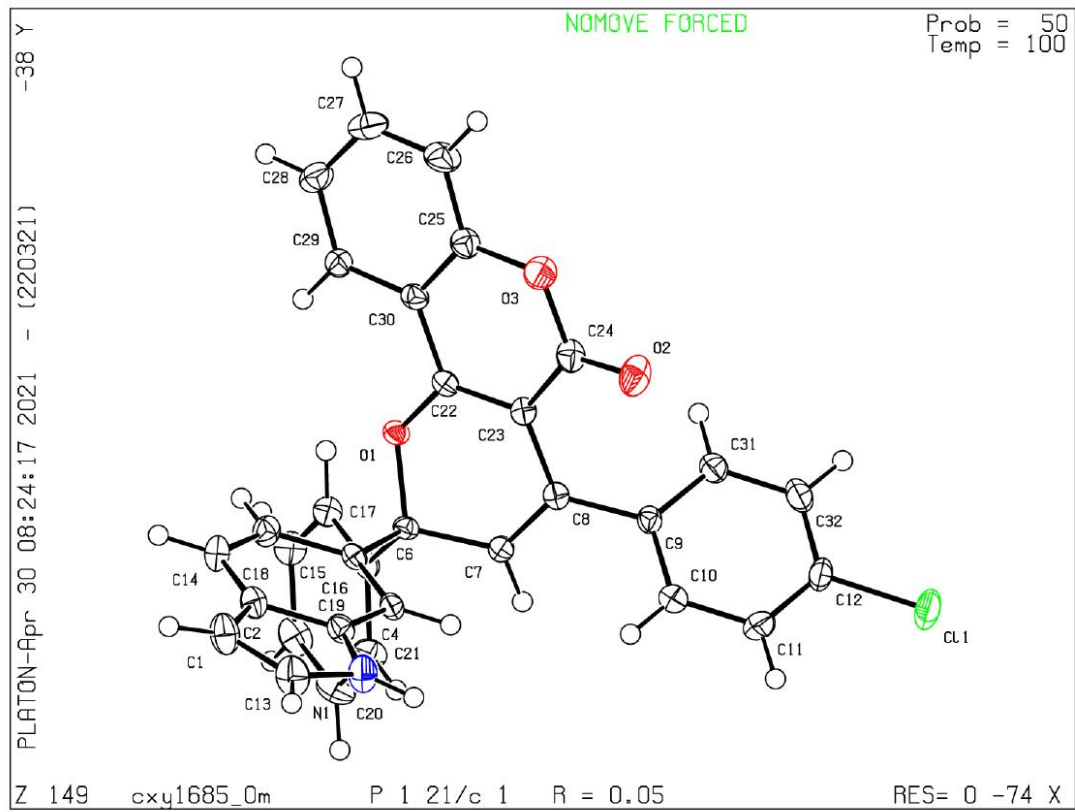



**Table Crystal data and structure refinement for 3ca.**

|                                             |                                                               |
|---------------------------------------------|---------------------------------------------------------------|
| Identification code                         | <b>3ca</b>                                                    |
| Empirical formula                           | C <sub>32</sub> H <sub>20</sub> ClNO <sub>3</sub>             |
| Formula weight                              | 501.94                                                        |
| Temperature/K                               | 100.0                                                         |
| Crystal system                              | monoclinic                                                    |
| Space group                                 | P2 <sub>1</sub> /c                                            |
| a/Å                                         | 14.9392(6)                                                    |
| b/Å                                         | 10.0969(4)                                                    |
| c/Å                                         | 17.2076(7)                                                    |
| α/°                                         | 90                                                            |
| β/°                                         | 111.7150(10)                                                  |
| γ/°                                         | 90                                                            |
| Volume/Å <sup>3</sup>                       | 2411.39(17)                                                   |
| Z                                           | 4                                                             |
| ρ <sub>calc</sub> /cm <sup>3</sup>          | 1.383                                                         |
| μ/mm <sup>-1</sup>                          | 0.195                                                         |
| F(000)                                      | 1040.0                                                        |
| Crystal size/mm <sup>3</sup>                | 0.35 × 0.31 × 0.24                                            |
| Radiation                                   | MoKα (λ = 0.71073)                                            |
| 2θ range for data collection/°              | 4.772 to 56.694                                               |
| Index ranges                                | -19 ≤ h ≤ 19, -13 ≤ k ≤ 13, -22 ≤ l ≤ 22                      |
| Reflections collected                       | 34701                                                         |
| Independent reflections                     | 6008 [R <sub>int</sub> = 0.0997, R <sub>sigma</sub> = 0.0749] |
| Data/restraints/parameters                  | 6008/0/335                                                    |
| Goodness-of-fit on F <sup>2</sup>           | 1.043                                                         |
| Final R indexes [I ≥ 2σ (I)]                | R <sub>1</sub> = 0.0484, wR <sub>2</sub> = 0.1094             |
| Final R indexes [all data]                  | R <sub>1</sub> = 0.1033, wR <sub>2</sub> = 0.1249             |
| Largest diff. peak/hole / e Å <sup>-3</sup> | 0.54/-0.46                                                    |

## **J: Reference**

1. a) M. Chen, J. Sun, *Angew. Chem. Int. Ed.* **2017**, *56*, 4583. b) D. Qian, L. Wu, Z. Lin, J. Sun, *Nat. Commun.* **2017**, *8*, 567.
2. Z. Chen, L. Tong, Z. Du, Z. Mao, X. Zhang, Y. Zou, M. Yan, *Org. Biomol. Chem.* **2018**, *16*, 2634.
